# Supplementary material for: Prospective cohort study of genomic newborn screening: BabyScreen+ pilot study protocol
Source: PubMed Central journal article supplement — BMJ Open. 2024 Apr 3;14(4):e081426. doi: 10.1136/bmjopen-2023-081426 (PMC11146401; doi:10.1136/bmjopen-2023-081426), 2024-04-03
Supplement: bmjopen-2023-081426.draft_revisions.pdf [file bmjopen-2023-081426.draft_revisions.pdf]

## Note from the Editors: Instructions for reviewers of study protocols

---

Since launching in 2011, BMJ Open has published study protocols for planned or ongoing research studies. If data collection is complete, we will not consider the manuscript.

Publishing study protocols enables researchers and funding bodies to stay up to date in their fields by providing exposure to research activity that may not otherwise be widely publicised. This can help prevent unnecessary duplication of work and will hopefully enable collaboration. Publishing protocols in full also makes available more information than is currently required by trial registries and increases transparency, making it easier for others (editors, reviewers and readers) to see and understand any deviations from the protocol that occur during the conduct of the study.

The scientific integrity and the credibility of the study data depend substantially on the study design and methodology, which is why the study protocol requires a thorough peer-review.

*BMJ Open* will consider for publication protocols for any study design, including observational studies and systematic reviews.

Some things to keep in mind when reviewing the study protocol:

- Protocol papers should report planned or ongoing studies. The dates of the study should be included in the manuscript.
- Unfortunately we are unable to customize the reviewer report form for study protocols. As such, some of the items (i.e., those pertaining to results) on the form should be scored as Not Applicable (N/A).
- While some baseline data can be presented, there should be no results or conclusions present in the study protocol.
- For studies that are ongoing, it is generally the case that very few changes can be made to the methodology. As such, requests for revisions are generally clarifications for the rationale or details relating to the methods. If there is a major flaw in the study that would prevent a sound interpretation of the data, we would expect the study protocol to be rejected.

# BMJ Open

## Prospective cohort study of genomic newborn screening: BabyScreen+ study protocol

|                               |                                                                                                                                                                                                                                                                                                                                                                                                                                                                                                                                                                                                                                                                                                                                                                                                                                                                                                                                                                                                                                                                                                                                                                                                                                                                                                                                                                                                                                                                                                                                                                                                                                                                                                                                                                                                                                                                                                                                                                                                                                                                                                                                                                                                                                             |
|-------------------------------|---------------------------------------------------------------------------------------------------------------------------------------------------------------------------------------------------------------------------------------------------------------------------------------------------------------------------------------------------------------------------------------------------------------------------------------------------------------------------------------------------------------------------------------------------------------------------------------------------------------------------------------------------------------------------------------------------------------------------------------------------------------------------------------------------------------------------------------------------------------------------------------------------------------------------------------------------------------------------------------------------------------------------------------------------------------------------------------------------------------------------------------------------------------------------------------------------------------------------------------------------------------------------------------------------------------------------------------------------------------------------------------------------------------------------------------------------------------------------------------------------------------------------------------------------------------------------------------------------------------------------------------------------------------------------------------------------------------------------------------------------------------------------------------------------------------------------------------------------------------------------------------------------------------------------------------------------------------------------------------------------------------------------------------------------------------------------------------------------------------------------------------------------------------------------------------------------------------------------------------------|
| Journal:                      | <i>BMJ Open</i>                                                                                                                                                                                                                                                                                                                                                                                                                                                                                                                                                                                                                                                                                                                                                                                                                                                                                                                                                                                                                                                                                                                                                                                                                                                                                                                                                                                                                                                                                                                                                                                                                                                                                                                                                                                                                                                                                                                                                                                                                                                                                                                                                                                                                             |
| Manuscript ID                 | bmjopen-2023-081426                                                                                                                                                                                                                                                                                                                                                                                                                                                                                                                                                                                                                                                                                                                                                                                                                                                                                                                                                                                                                                                                                                                                                                                                                                                                                                                                                                                                                                                                                                                                                                                                                                                                                                                                                                                                                                                                                                                                                                                                                                                                                                                                                                                                                         |
| Article Type:                 | Protocol                                                                                                                                                                                                                                                                                                                                                                                                                                                                                                                                                                                                                                                                                                                                                                                                                                                                                                                                                                                                                                                                                                                                                                                                                                                                                                                                                                                                                                                                                                                                                                                                                                                                                                                                                                                                                                                                                                                                                                                                                                                                                                                                                                                                                                    |
| Date Submitted by the Author: | 27-Oct-2023                                                                                                                                                                                                                                                                                                                                                                                                                                                                                                                                                                                                                                                                                                                                                                                                                                                                                                                                                                                                                                                                                                                                                                                                                                                                                                                                                                                                                                                                                                                                                                                                                                                                                                                                                                                                                                                                                                                                                                                                                                                                                                                                                                                                                                 |
| Complete List of Authors:     | <p>Lunke, Sebastian; Murdoch Children's Research Institute, Victorian Clinical Genetics Services; University of Melbourne</p> <p>Bouffler, Sophie; Australian Genomics Health Alliance; Murdoch Children's Research Institute</p> <p>Downie, Lilian; Victorian Clinical Genetics Services Ltd, Victorian Clinical Genetics Service; University of Melbourne</p> <p>Caruana, Jade; Murdoch Children's Research Institute</p> <p>Amor, David J.; Murdoch Children's Research Institute; University of Melbourne</p> <p>Archibald, Alison; Murdoch Children's Research Institute, Victorian Clinical Genetics Services; University of Melbourne</p> <p>Bombard, Yvonne; St Michael's Hospital, Genomics Health Services Research Program; University of Toronto, Institute of Health Policy, Management and Evaluation</p> <p>Christodoulou, John; Murdoch Children's Research Institute, Brain and Mitochondrial Research Group; The University of Melbourne, Department of Paediatrics</p> <p>Clausen, Marc; St Michael's Hospital, Genomics Health Services Research Program</p> <p>De Fazio, Paul; Murdoch Children's Research Institute, Victorian Clinical Genetics Services</p> <p>Greaves, Ronda; Murdoch Children's Research Institute, Victorian Clinical Genetics Services; University of Melbourne</p> <p>Hollizeck, Sebastian; Murdoch Children's Research Institute, Victorian Clinical Genetics Services</p> <p>Kanga-Parabia, Anaita; University of Melbourne; Murdoch Children's Research Institute</p> <p>Lang, Nitzan; Murdoch Children's Research Institute, Victorian Clinical Genetics Services</p> <p>Lynch, Fiona; University of Melbourne</p> <p>Peters, Riccarda; University of Melbourne</p> <p>Sadedin, Simon; Murdoch Children's Research Institute, Victorian Clinical Genetics Services</p> <p>Tutty, Erin; University of Melbourne; Murdoch Children's Research Institute</p> <p>Eggers, Stefanie; Murdoch Children's Research Institute, Victorian Clinical Genetics Services</p> <p>Lee, Crystle; Murdoch Children's Research Institute, Victorian Clinical Genetics Services</p> <p>Wall, Meaghan; Murdoch Children's Research Institute, Victorian Clinical Genetics Services; University of Melbourne</p> |

|           |                                                                                                                                                                                                                                                                                                                                                                                                                                                                                                                                                                                                                                                                                                                                                                                     |
|-----------|-------------------------------------------------------------------------------------------------------------------------------------------------------------------------------------------------------------------------------------------------------------------------------------------------------------------------------------------------------------------------------------------------------------------------------------------------------------------------------------------------------------------------------------------------------------------------------------------------------------------------------------------------------------------------------------------------------------------------------------------------------------------------------------|
|           | Yeung, Alison ; Murdoch Children's Research Institute, Victorian Clinical Genetics Services; University of Melbourne<br>Gaff , Clara; Walter and Eliza Hall Institute of Medical Research, Melbourne Genomics Health Alliance ; University of Melbourne<br>Gyngell, Christopher; University of Melbourne; Murdoch Children's Research Institute<br>Vears, Danya F; University of Melbourne; Murdoch Children's Research Institute<br>Best, Stephanie; Peter MacCallum Cancer Centre, Department of Health Services Research; Australian Genomics Health Alliance<br>Goranitis, I; University of Melbourne; Australian Genomics Health Alliance<br>Stark, Zornitza; Murdoch Children's Research Institute, Victorian Clinical Genetics Services; Australian Genomics Health Alliance |
| Keywords: | GENETICS, PAEDIATRICS, Health policy < HEALTH SERVICES ADMINISTRATION & MANAGEMENT                                                                                                                                                                                                                                                                                                                                                                                                                                                                                                                                                                                                                                                                                                  |
|           |                                                                                                                                                                                                                                                                                                                                                                                                                                                                                                                                                                                                                                                                                                                                                                                     |

SCHOLARONE™  
Manuscripts

## Prospective cohort study of genomic newborn screening: BabyScreen+ study protocol

Sebastian Lunke<sup>1,2</sup>, Sophie E Bouffler<sup>3,4</sup>, Lilian Downie<sup>1,2</sup>, Jade Caruana<sup>4</sup>, David J Amor<sup>2,4</sup>,  
Alison D Archibald<sup>1,2</sup>, Yvonne Bombard<sup>5,6</sup>, John Christodoulou<sup>2,4</sup>, Marc Clausen<sup>5</sup>, Paul De  
Fazio<sup>1</sup>, Ronda F Greaves<sup>1,2</sup>, Sebastian Hollizeck<sup>1</sup>, Anaita Kanga-Parabia<sup>2,4</sup>, Nitzan Lang<sup>1</sup>, Fiona  
Lynch<sup>2</sup>, Riccarda Peters<sup>2</sup>, Simon Sadedin<sup>1</sup>, Erin Tutty<sup>2,4</sup>, Stefanie Eggers<sup>1</sup>, Crystle Lee<sup>1</sup>,  
Meaghan Wall<sup>1,2</sup>, Alison Yeung<sup>1,2</sup>, Clara L Gaff<sup>2,7</sup>, Christopher Gyngell<sup>2,4</sup>, Danya F Vears<sup>2,4</sup>,  
Stephanie Best<sup>3,8</sup>, Ilias Goranitis<sup>2,3</sup>, Zornitza Stark<sup>1,3</sup>

<sup>1</sup>Victorian Clinical Genetics Services, Murdoch Children's Research Institute, Melbourne, Australia

<sup>2</sup>University of Melbourne, Melbourne, Australia

<sup>3</sup>Australian Genomics, Melbourne, Australia

<sup>4</sup>Murdoch Children's Research Institute, Melbourne, Australia

<sup>5</sup>Genomics Health Services Research Program, St. Michael's Hospital, Unity Health Toronto, Toronto, Ontario, Canada

<sup>6</sup>Institute of Health Policy, Management and Evaluation, University of Toronto, Toronto, Ontario, Canada

<sup>7</sup>Melbourne Genomics Health Alliance, Melbourne Australia

<sup>8</sup>Department of Health Services Research, Peter MacCallum Cancer Centre, Melbourne, Victoria, Australia

**Corresponding authors:** Sebastian Lunke, [Sebastian.lunke@mcri.edu.au](mailto:Sebastian.lunke@mcri.edu.au), Murdoch Children's Research Institute, Melbourne, VIC, Australia. Zornitza Stark, [Zornitza.stark@vcgs.org.au](mailto:Zornitza.stark@vcgs.org.au), Victorian Clinical Genetics Services, VIC, Australia.

**ABSTRACT**

**Introduction:** Newborn bloodspot screening (NBS) is a highly successful public health program that utilises biochemical and other assays to screen for severe but treatable childhood-onset conditions. Introducing genomic sequencing into NBS programs increases the range of detectable conditions but raises practical and ethical issues. Evidence from prospectively ascertained cohorts is required to guide policy and future implementation.

This study aims to develop, implement, and evaluate a genomic NBS (gNBS) pilot program.

**Methods and analysis:** The BabyScreen+ study will pilot gNBS in three phases. In the pre-implementation phase, study materials, including education resources, decision support and data collection tools, will be designed. Focus groups and key informant interviews will also be undertaken to inform delivery of the study and future gNBS programs. During the implementation phase, we will prospectively recruit birth parents in Victoria, Australia, to screen 1000 newborns for over 600 severe, treatable, childhood-onset conditions. Clinically accredited whole genome sequencing will be performed following stdNBS using the same sample. High chance results will be returned by genetic healthcare professionals, with follow-on genetic and other confirmatory testing and referral to specialist services as required. The post-implementation phase will evaluate the feasibility of gNBS as the primary aim, and assess ethical, implementation, psychosocial, and health economic factors to inform future service delivery.

**Ethics and dissemination:** This project received ethics approval from the Royal Children's Hospital Melbourne Research Ethics Committee: HREC/91500/RCHM-2023, HREC/90929/RCHM-2022 and HREC/91392/RCHM-2022. Findings will be disseminated to policy makers, and through peer-reviewed journals and conferences.

1  
2  
3 **Word count:** 2715  
4

5 **Keywords:** Genomic newborn screening, rare disease, genomics, implementation  
6  
7  
8  
9  
10  
11  
12  
13  
14  
15  
16  
17  
18  
19  
20  
21  
22  
23  
24  
25  
26  
27  
28  
29  
30  
31  
32  
33  
34  
35  
36  
37  
38  
39  
40  
41  
42  
43  
44  
45  
46  
47  
48  
49  
50  
51  
52  
53  
54  
55  
56  
57  
58  
59  
60

For peer review only

## ARTICLE SUMMARY

### Strengths and limitations of this study

- A prospective feasibility study to offer genomic newborn screening to birth parents during pregnancy.
- The study includes a multidisciplinary evaluation approach ascertaining perspectives from public, health professionals and participating parents.
- The study will utilise online recruitment tools to facilitate education and consent to allow scaling up for a future screening program.
- Interpreter-assisted recruitment is available for people who use a language other than English.
- Recruitment will encompass birth parents in the private and public healthcare system, however, may not be representative of the wider population as this is a pilot study.

## INTRODUCTION

Newborn bloodspot screening (NBS) is a well-established and highly successful public health intervention that has enabled the early diagnosis and prompt treatment of many severe childhood conditions.(1) Traditionally, NBS programs select conditions for inclusion using the classic Wilson and Jungner screening principles,(2) and employ targeted biochemical and other assays that can be delivered at scale with rapid turnaround times and at a relatively low cost. Wide variability exists between, and even within, countries in the number of conditions included, ranging from nine in the United Kingdom to 80 in California, USA.(3) Currently in Australia, NBS programs are funded by state and territory governments and screen for around 27 conditions.

1  
2  
3  
4  
5  
6 In the last decade, the use of genomic sequencing in the research and clinical setting has  
7  
8 transformed rare disease diagnosis.(3) At the same time, increased understanding of the  
9  
10 underlying molecular mechanisms of disease has accelerated the development of precision  
11  
12 treatments.(4) The gap between the number of rare diseases now considered 'treatable'  
13  
14 and those included in NBS programs is expanding rapidly. Integrating genomic sequencing  
15  
16 into NBS programs would enable screening for a much broader range of conditions, while  
17  
18 also providing the flexibility to quickly add more conditions at low incremental cost.  
19  
20  
21  
22  
23  
24

25 The concept of performing genomic sequencing in all children at birth, termed genomic  
26  
27 newborn screening (gNBS), has been extensively debated. Empirical evidence to guide  
28  
29 decision-making is starting to emerge,(5-9) addressing important questions of test design,  
30  
31 diagnostic performance, and clinical utility, as well as parental and healthcare professionals'  
32  
33 (HCP) views and concerns.(10) However, evidence from prospective cohorts is limited, with  
34  
35 the most extensively evaluated cohort, the BabySeq study,(11) having recruited 159 infants.  
36  
37  
38  
39  
40  
41

42 Many concerns have been raised, including reduced sensitivity of genomic testing for some  
43  
44 of the metabolic conditions screened via standard NBS (stdNBS),(7) and the appropriate  
45  
46 timing and means of parental education to ensure informed consent.(12) None of the  
47  
48 studies to date have fully addressed the key questions of acceptability, feasibility, scalability,  
49  
50 and cost-effectiveness of gNBS. Most have focussed on the clinical, legal, insurance, and  
51  
52 social contexts in the USA,(1, 6, 7, 9, 11, 12) which have limited applicability to the  
53  
54 Australian and other public healthcare systems.  
55  
56  
57  
58  
59  
60



1  
2  
3 Our prospective cohort study, BabyScreen+, will address many of these questions in an  
4  
5 Australian context to inform a future population-scale gNBS program. We will perform gNBS  
6  
7 for a cohort of 1000 Victorian newborns using whole genome sequencing (WGS) that will  
8  
9 increase the range of conditions screened in stdNBS to over 600 treatable, childhood-onset  
10  
11 conditions. Insights from our research will be used to design laboratory processes that can  
12  
13 deliver clinically accredited gNBS in an appropriate timeframe and at population scale. In  
14  
15 addition, our study will inform the design of pre- and post-test processes, including  
16  
17 education, decision support, informed consent, and results management, aimed at  
18  
19 facilitating understanding and acceptance of gNBS for parents, HCP, and the Australian  
20  
21 public.  
22  
23  
24  
25  
26  
27  
28  
29

## 30 **METHODS AND ANALYSIS**

### 31 **Study design**

32  
33 The BabyScreen+ study will involve three phases, as outlined in Figure 1. Following the  
34  
35 design and implementation of education and consent materials, research data collection  
36  
37 tools, and laboratory pathways, we will offer and evaluate the feasibility of gNBS. Clinically  
38  
39 accredited gNBS will be performed for over 600 treatable, childhood-onset conditions  
40  
41 following stdNBS. Evaluation will focus on the health economic, implementation science,  
42  
43 psychosocial, and ethical aspects of gNBS.  
44  
45  
46  
47  
48  
49  
50  
51

### 52 **Study aims**

53  
54 The overall aim of this study is to design and deliver a gNBS program to screen 1000  
55  
56 prospectively recruited newborns and assess feasibility.  
57  
58  
59  
60

1  
2  
3 Secondary aims are to evaluate:  
4  
5

- 6 • Public preferences and perspectives for the delivery of gNBS
- 7
- 8 • Ethical issues
- 9
- 10 • Performance of gNBS alongside stdNBS, comparing diagnostic performance, and
- 11 clinical utility
- 12
- 13 • Parental screening experience and psychosocial outcomes
- 14
- 15 • Cost-effectiveness and cost-benefit of gNBS relative to stdNBS
- 16
- 17 • Implementation of gNBS, including acceptability to HCP, parents, and the public
- 18
- 19 • Value and ethical implications of using genomic data generated at birth as a lifelong
- 20 healthcare resource
- 21
- 22
- 23
- 24
- 25
- 26
- 27
- 28
- 29

### 30 **Study timetable and sites**

31  
32 The pre-implementation phase of the study commenced in July 2022 (Figure 1). Staged  
33 recruitment into the implementation phase of the study began on 20 July 2023 at three  
34 sites, including a private obstetrics practice and two public hospitals. The post-  
35 implementation phase will commence at the completion of recruitment, and the study will  
36 be completed by 31 May 2027.  
37  
38  
39  
40  
41  
42  
43  
44  
45  
46  
47

### 48 **Pre-implementation phase**

49  
50 The pre-implementation phase comprises the design, development, and testing of study  
51 processes and materials. These include HCP education materials; the online enrolment,  
52 decision support, education, and consent platform; evaluation data collection tools; the list  
53 of genes for inclusion in screening; and laboratory protocols. Key informant interviews,  
54  
55  
56  
57  
58  
59  
60

1  
2  
3 focus groups, and discrete choice experiments will be undertaken to assess public and HCP  
4  
5 views on study processes and acceptability of gNBS.  
6  
7  
8  
9

### 10 Condition and gene selection

11  
12 The overarching condition selection principles that are used in stdNBS were maintained  
13  
14 when considering which genes and conditions to include in this study.(2) Included  
15  
16 conditions:  
17  
18

- 19  
20 • have a well-established gene-disease association and the majority of known  
21  
22 clinically relevant variants are ascertainable by WGS
- 23  
24 • are considered severe (i.e., causing mortality or considerable morbidity/disability in  
25  
26 the majority of affected children if untreated),
- 27  
28 • have early-onset of disease or significantly benefit from early intervention (<5 years  
29  
30 of age in the majority), and
- 31  
32 • have an available treatment (e.g., drugs/supplements, enzyme replacement  
33  
34 therapy, organ or bone marrow transplant, diet modification, gene therapy) or  
35  
36 other intervention that significantly alters the natural progression of the condition.  
37  
38 Interventions must be accessible to study participants in Victoria, Australia.  
39  
40  
41  
42  
43  
44  
45  
46  
47

48 We included all conditions that are currently screened in stdNBS in Australia. The gene  
49  
50 selection process and panel content has been informed by prior local and international  
51  
52 gNBS projects.(13, 14) Genes included in the study are publicly available for review and  
53  
54 comment on PanelApp Australia (BabyScreen+ newborn screening panel:  
55  
56 <https://panelapp.gha.umccr.org/panels/3931/>) and on the study website along with a plain  
57  
58 language description of the gene selection process and screening approach.  
59  
60

## Key informant interviews

The implementation phase will be informed by interviews with key stakeholders involved in the current delivery of stdNBS. These include laboratory staff, HCP offering stdNBS, other antenatal HCP, and paediatric physicians. Data collection and analysis will be guided by the Action, Actor, Context, Target, Time (AACTT) framework(15) to capture views on who should do what and when. Interviews will explore opinions on offering gNBS; education and consent; sample collection and testing; and result management.

## Eliciting public preferences and perspectives

Public preferences and values will be sought through a multi-phase mixed-methods design involving focus groups and discrete choice experiment surveys (DCEs) with members of the Australian public. Focus groups will explore public preferences and perspectives for 1) implementation of gNBS, 2) risks and benefits of gNBS, and 3) use of data generated by gNBS as a lifetime resource and will involve qualitative exploration through facilitated discussion to elicit characteristics of gNBS delivery. Outcomes from the focus groups will be used to inform the implementation phase of the study. The DCE surveys will elicit public preferences, values, and priorities for gNBS to support the economic evaluation and implementation of gNBS in Australia.

## Implementation phase

### HCP engagement

We will invite HCP from selected public and private healthcare settings to offer the study to their patients. HCP participation is voluntary and will not be incentivised. HCP who wish to

1  
2  
3 be involved will receive education and support from the study team regarding gNBS and  
4  
5 study processes.  
6  
7  
8  
9

#### 10 Participant eligibility and recruitment

11  
12 Pregnant individuals will be invited to take part at in the third trimester. At one public  
13  
14 hospital, recruitment will also occur via advertisement on a digital pregnancy care platform.  
15  
16 To be eligible to participate, birth parents must be due to give birth in Victoria, Australia,  
17  
18 within the study timeframe, and participate in the state-based stdNBS. They must be aged  
19  
20 16 years or over, or have a legal representative capable of providing informed consent on  
21  
22 their behalf. Enrolment must be completed by two weeks after their baby is born, to ensure  
23  
24 that results are returned in a clinically meaningful timeframe.  
25  
26  
27  
28  
29  
30  
31  
32

#### 33 Enrolment and Consent

34  
35 After receiving a study invitation, birth parents will complete enrolment and consent for the  
36  
37 study online. Figure 2 provides a detailed outline of the participation process.  
38  
39  
40  
41  
42

43 Birth parents will first be asked to provide consent for the research component of the study  
44  
45 via REDCap.(16, 17) This encompasses collection of personal and health related data and  
46  
47 survey responses. Participants who use a language other than English will be assisted to  
48  
49 enrol and take part by a research genetic counsellor and an interpreter.  
50  
51  
52  
53

54  
55 Birth parents who consent to research will receive education and decision support, as well  
56  
57 as provide informed consent to clinical gNBS for their baby, via the online Genetics Adviser  
58  
59 platform. Genetics Adviser is a patient-centred interactive online tool that provides  
60

1  
2  
3 educational, decisional, and counselling support to patients undergoing genetic testing,  
4  
5 along with managing consent capture and return of results  
6  
7  
8 (<https://www.geneticsadviser.com/>). Genetics Adviser has been extensively evaluated and  
9  
10 improved by iterative co-design and has been shown to improve participant knowledge and  
11  
12 decisional confidence.(18-21) The study will use a locally deployed version of the platform,  
13  
14 adapted in collaboration with the Genetics Adviser team.  
15  
16

17  
18  
19  
20 A 'check-in' module in Genetics Adviser will automatically remind birth parents about the  
21  
22 study four weeks prior to their estimated due date via email and SMS. Participants will be  
23  
24 invited to log back into Genetics Adviser via email and SMS, where they will receive a brief  
25  
26 refresher on gNBS, explore how they are currently feeling, and have the option to review  
27  
28 their gNBS consent.  
29  
30  
31  
32

33  
34  
35 Genetic counselling is available at any time, if requested. Consent to research participation  
36  
37 can be withdrawn at any time. Consent to clinical gNBS can be withdrawn at any time prior  
38  
39 to result reporting.  
40  
41  
42

#### 43 44 45 Sample testing

46  
47 Sample collection will be performed by the pregnancy service provider as part of stdNBS  
48  
49 undertaken by Victorian Clinical Genetics Services (VCGS). Following completion of stdNBS,  
50  
51 four 3mm punches will be taken from a single dried blood spot and processed using  
52  
53 clinically accredited protocols and procedures at VCGS. Following DNA extraction, PCR-free  
54  
55 genome sequencing libraries will be created using the PCR-free DNA prep kit (Illumina) and  
56  
57 sequenced to an average depth of 30x on NovaSeq 6000 of X Plus instruments (Illumina).  
58  
59  
60

1  
2  
3 For samples with insufficient quantity or quality of DNA, the study team will contact the  
4  
5 participant to arrange sample recollection.  
6  
7  
8  
9

10 Genome data analysis and interpretation will be performed using validated and clinically  
11  
12 accredited, cloud-based analysis pipelines and procedures, including the Dragen and  
13  
14 eMedgene (Illumina) analysis tools. Interpretation will be restricted to genes on the  
15  
16 BabyScreen+ gNBS panel, and only variants that are classified as likely pathogenic or  
17  
18 pathogenic will be considered for reporting. We will not report carrier status, adult-onset  
19  
20 conditions, or variants of uncertain significance. All variants that are considered for  
21  
22 reporting will be discussed by a team of clinical specialists, genetic pathologists, and medical  
23  
24 scientists.  
25  
26  
27  
28  
29  
30  
31  
32

### 33 Screening results

34 Results will be returned within four weeks of sample collection. There will be two categories  
35  
36 of result:  
37  
38

- 39 1) A low chance result, where no reportable variants are identified, or
- 40 2) A high chance result, where one or more reportable variants are identified.  
41  
42  
43  
44  
45  
46

47 *For low chance results*, birth parents will be informed via the online Genetics Adviser  
48  
49 platform following notification of result availability via email and SMS. Genetic counselling  
50  
51 follow-up will be available on request.  
52  
53  
54  
55  
56

57 *For high chance results*, birth parents will receive a phone call from a genetics HCP to discuss  
58  
59 the result, arrange an appointment and any required additional testing (including  
60

1  
2  
3 confirmation of reported variants), as well as referral to specialist services. Further genetic  
4  
5 counselling support will also be available.  
6  
7  
8  
9

## 10 **Post-implementation phase**

11  
12  
13 The study will move to the post-implementation phase after recruitment, with a focus on  
14  
15 evaluation and data analysis. See Figure 1 and Figure 2 for details on the data collection  
16  
17 tools, timepoints, and evaluation focus areas.  
18  
19  
20  
21  
22

### 23 Evaluation

24  
25 Feasibility will be evaluated through a set of key performance indicators gathered from  
26  
27 laboratory data. This includes data on the percentage of study samples that:  
28  
29

- 30 • Are successfully identified from stdNBS samples
- 31
- 32 • Require a recollect due to insufficient DNA
- 33
- 34 • Fail sequencing
- 35
- 36 • Are processed within the expected turn-around time
- 37
- 38 • Have a concordant high chance result from stdNBS and gNBS
- 39
- 40
- 41
- 42
- 43
- 44

45 Views on acceptability and participant experiences will be collected during the first two  
46  
47 phases of the study. Participant, public and HCP views will be captured through key  
48  
49 informant interviews, focus groups, surveys, and discrete choice experiments (see Figures 1  
50  
51 and 2 and Table 1). Participants will complete compulsory surveys at enrolment (T1) and  
52  
53 after consent (T2), followed by optional surveys at 3-months post-result (T3) and ~12-  
54  
55 months post-result (T4). Participants will also be invited to take part in interviews before  
56  
57 and after receiving their gNBS results. Participants who decline gNBS will be asked to  
58  
59  
60



complete a modified T2 survey and invited to take part in an interview. Refer to Table 1 for survey and interview measures.

Table 1: Survey and interview measures used to ascertain parental experiences and preferences throughout the study

| Measure                                                 | Description                                                                                                                                                                                                                                            | T1 | T2 | Pre-result int | T3 | Post-result int | T4 | Decliner int |
|---------------------------------------------------------|--------------------------------------------------------------------------------------------------------------------------------------------------------------------------------------------------------------------------------------------------------|----|----|----------------|----|-----------------|----|--------------|
| Details of pregnancy and demographics                   | Estimated due date, intended birth hospital, sex of baby (if known), twin/triplet pregnancy details (if applicable), education, income, language, marital status, number of children, prior experience with genomic testing, family history, ancestry. | X  |    |                |    |                 |    |              |
| Acceptability E-scale [gNBS acceptor]                   | Seven-item scale to determine the acceptability and usability of computerised health-related programs(22).                                                                                                                                             |    | X  |                |    |                 |    |              |
| Information in Genetics Adviser [gNBS acceptor]         | Three study-specific questions to assess the perceived bias of Genetics Adviser content and review/influence of the study gene list.                                                                                                                   |    | X  |                |    |                 |    |              |
| Knowledge of gNBS [gNBS acceptor]                       | Eight study-specific True/False questions to determine participants' understanding of gNBS.                                                                                                                                                            |    | X  |                | X  |                 | X  |              |
| Difficulty and deliberation of decision [gNBS acceptor] | Three study-specific questions to assess the level of difficulty making a decision, length of deliberation and sources of information used                                                                                                             |    | X  |                |    |                 |    |              |

|                                                     |                                                                                                                                                                                                                                                                                                                                         |  |   |  |   |  |   |  |
|-----------------------------------------------------|-----------------------------------------------------------------------------------------------------------------------------------------------------------------------------------------------------------------------------------------------------------------------------------------------------------------------------------------|--|---|--|---|--|---|--|
|                                                     | when consenting to gNBS.                                                                                                                                                                                                                                                                                                                |  |   |  |   |  |   |  |
| Reasons for accepting or declining [gNBS accepter]  | One study-specific question addressing reasons for consenting to gNBS. Participants are asked to rate a selection of reasons on a 5-point Likert scale and asked to comment if there are other reasons not listed.                                                                                                                      |  | X |  |   |  |   |  |
| Willingness to pay [gNBS accepter]                  | Dynamic triple-bounded dichotomous choice contingent valuation, also known as a 'bidding game', to assess the value participants place on gNBS.                                                                                                                                                                                         |  | X |  | X |  | X |  |
| State trait anxiety index (STAI-AD) [gNBS accepter] | 26-item scale measuring state and trait anxiety. <i>Copyright © 1968, 1977 by Charles D. Spielberger. All rights reserved in all media. Published by Mind Garden, Inc. <a href="http://www.mindgarden.com">www.mindgarden.com</a></i><br>Note: Only the 6 questions that form the STAI-6 short form(23) are repeated at each timepoint. |  | X |  | X |  | X |  |
| Reasons for declining [gNBS decliner]               | One study-specific question exploring the reasons for declining. Participants are presented with 11 reasons and asked to rate how much each one influenced their decision on a scale of 1 (did not influence) to 5 (strongly influenced).                                                                                               |  | X |  |   |  |   |  |
| Result recall                                       | One study-specific question to determine if participants recall their baby's result correctly.                                                                                                                                                                                                                                          |  |   |  | X |  | X |  |

|                                                            |                                                                                                                                                 |  |  |   |   |   |   |   |
|------------------------------------------------------------|-------------------------------------------------------------------------------------------------------------------------------------------------|--|--|---|---|---|---|---|
| Decision regret scale                                      | Five-item scale to measure regret after a health care decision(24).                                                                             |  |  |   | X |   | X |   |
| Health system utilisation                                  | One study-specific question to determine health system utilisation post-result.                                                                 |  |  |   | X |   | X |   |
| Result dissemination<br><i>[high chance result only]</i>   | One study-specific question for people to determine who participants have shared their result with and why.                                     |  |  |   | X |   |   |   |
| Genomics Outcome Scale<br><i>[high chance result only]</i> | Six-item scale based on the Genetic Counselling Outcome Scale-24 adapted to assess outcomes of genetic counselling and patient empowerment.(25) |  |  |   | X |   |   |   |
| Service delivery preferences                               | 10 study-specific questions assessing opinions on if, how, and when gNBS should be offered, and what conditions should be screened.             |  |  |   | X |   |   |   |
| Experience of gNBS                                         | Questions on prior knowledge of genetic or genomic testing and experiences taking part in the study.                                            |  |  | X |   | X |   | X |
| Expectations of results                                    | Questions on expected result and how they plan to use the result.                                                                               |  |  | X |   |   |   |   |
| Receiving results, understanding, and making meaning       | Questions on result including knowledge of outcomes and how they plan to use the result.                                                        |  |  |   |   | X |   |   |
| Attitudes and perceptions                                  | Questions on if, how, and when gNBS should be offered, and what conditions should be screened.                                                  |  |  | X |   | X |   | X |
| Decision making                                            | Questions on reasons for declining gNBS.                                                                                                        |  |  |   |   |   |   | X |

|                      |                                                                                   |  |  |  |  |  |   |  |
|----------------------|-----------------------------------------------------------------------------------|--|--|--|--|--|---|--|
| Data re-use          | Study-specific questions around preferences for additional analyses of gNBS data. |  |  |  |  |  | X |  |
| Future gNBS decision | One study-specific question asking preference for gNBS for future children        |  |  |  |  |  | X |  |

T1, survey at enrolment; T2, survey post-consent; T3, 3-months post result survey; T4, 12-months post result survey; int, interviews; STAI-6, Six-item State-Trait Anxiety Inventory; STAI-AD, State-Trait Anxiety Inventory for Adults; gNBS, genomic newborn screening.

Health economic analyses will be performed from the perspective of the Australian healthcare system, using a lifetime horizon, and based on the outcomes of cost per additional diagnosis, cost per quality-adjusted life-year gained, and net benefit. A budget impact analysis will be conducted to provide policy-relevant insights into the affordability and sustainability of implementing gNBS.

Potential barriers and enablers to implementation of gNBS will be identified to generate strategies to support successful delivery and inform future studies. These will be ascertained through theory-informed interviews. This will include capturing the experiences of professionals including HCP involved in the delivery of gNBS, and those impacted by the implementation of gNBS, including perinatal HCP and paediatric physicians. In addition, process mapping will be undertaken with laboratory staff and study team members at intervals throughout the study to understand adaptations required to deliver gNBS at scale and within clinically meaningful timeframes.

## Data analysis

Personal identifying information, clinical, and evaluation data will be collected using recording devices, and electronic data collection forms in the online Genetics Adviser platform(21) and REDCap,(16, 17) both hosted at the Murdoch Children's Research Institute, Melbourne, Australia.

Findings from interviews and surveys will be used to provide qualitative and statistical information on the associations between a particular behaviour and opinions or attitudes about the program. Qualitative data will be either deductively analysed where a theoretical framework has been employed e.g., AACTT(15) or analysed using inductive content analysis(26) or thematic analysis to generate rich descriptions responding to the research aims e.g., acceptability of testing. Economic evaluation and discrete choice experiments will be conducted according to best practice recommendations.(27-29) Quotes from participants will be used to illustrate qualitative findings in scientific presentations and other publications. Statistical analysis will utilise appropriate methods and tests depending on the nature of the data and its normality. Probability values of  $<0.05$  will be considered statistically significant, and confidence intervals will be calculated where possible.

## Patient and public involvement

The pre-implementation phase of the study involved extensive consultation with the public via focus groups and discrete choice experiment surveys. These have informed the design of the implementation phase. Condition selection has been done in conjunction with patient

1  
2  
3 support groups. The study also uses Genetics Adviser, a decision support platform with  
4  
5 extensive public input into design and development.(18-21)  
6  
7  
8  
9

## 10 **ETHICS AND DISSEMINATION**

11  
12  
13 This study is governed and administered by the Murdoch Children’s Research Institute  
14  
15 (MCRI), Melbourne, Australia. All genetic testing is performed by VCGS, Melbourne,  
16  
17 Australia, a wholly owned not-for-profit subsidiary of MCRI. VCGS is clinically accredited  
18  
19 (NATA/RCPA) to ISO15189:2012 to carry out genetic and genomic testing. The project has  
20  
21 received ethics approval from the Royal Children’s Hospital Melbourne Human Research  
22  
23 Ethics Committee (main BabyScreen+ protocol: HREC/91500/RCHM-2023; key informant  
24  
25 interviews: HREC/90929/RCHM-2022; and focus groups and DCE: HREC/91392/RCHM-2022).  
26  
27  
28 Findings from this study will be published in peer-reviewed scientific journal articles and  
29  
30 presented at appropriate clinical and research conferences. The findings will also be  
31  
32 disseminated to policy makers including the Standing Committee on Screening. All  
33  
34 participants have provided informed consent to be involved in this study.  
35  
36  
37  
38  
39  
40  
41  
42  
43  
44  
45  
46  
47  
48  
49  
50  
51  
52  
53  
54  
55  
56  
57  
58  
59  
60

## ACKNOWLEDGEMENTS

The research conducted at the Murdoch Children's Research Institute was supported by the Victorian Government's Operational Infrastructure Support Program. The Chair in Genomic Medicine awarded to JC is generously supported by The Royal Children's Hospital Foundation. YB holds the Canada Research Chair in Genomics Health Services and Policy, funded by the Canada Research Chairs Program.

## AUTHOR CONTRIBUTIONS

All authors contributed to the design of the protocol, including its concept and the critical review and final approval of the manuscript. Sebastian Lunke, Sophie Bouffler and Zornitza Stark drafted the manuscript. Simon Sadedin, Stefanie Eggers, Sebastian Hollizeck, Crystle Lee, Meaghan Wall, Ronda Greaves, Paul De Fazio and Sebastian Lunke contributed to the design of the laboratory processes. David Amor, Lilian Downie, Alison Archibald, John Christodoulou, Alison Yeung, Zornitza Stark and Sebastian Lunke contributed to the design of the gene list. Yvonne Bombard, Marc Clausen, Jade Caruana, Alison Archibald, Lilian Downie, Clara Gaff, Sophie Bouffler, Nitzan Lang, Anaita Kanga-Parabia and Zornitza Stark contributed to the design of participant and HCP education materials. Danya Vears, Fiona Lynch and Christopher Gyngell contributed to the design of the ethical evaluation. Erin Tutty, Anaita Kanga-Parabia, Alison Archibald and Stephanie Best contributed to the design of the psychosocial and implementation evaluation. Riccarda Peters and Ilias Goranitis contributed to the design of the health economic evaluation.

1  
2  
3  
4  
5  
6 **FUNDING STATEMENT**  
7

8 The BabyScreen+ study is funded by the Australian Government's Medical Research Future  
9 Fund as part of the Genomics Health Futures Mission, grant MRF2015937 titled '*Genomic  
10 newborn screening for personalised lifelong healthcare in Australian babies*'.  
11  
12  
13  
14  
15  
16  
17

18 **COMPETING INTERESTS**  
19

20 YB and MC are cofounders of the Genetics Adviser. The other authors declare no relevant  
21 disclosures.  
22  
23  
24  
25  
26  
27  
28  
29  
30  
31  
32  
33  
34  
35  
36  
37  
38  
39  
40  
41  
42  
43  
44  
45  
46  
47  
48  
49  
50  
51  
52  
53  
54  
55  
56  
57  
58  
59  
60



## REFERENCES

1. Therrell BL, Padilla CD, Loeber JG, Kneisser I, Saadallah A, Borrajo GJ, et al. Current status of newborn screening worldwide: 2015. *Semin Perinatol.* 2015;39(3):171-87.
2. Wilson JMG, Jungner G, World Health O. Principles and practice of screening for disease. Geneva: World Health Organization; 1968.
3. Stark Z, Scott RH. Genomic newborn screening for rare diseases. *Nat Rev Genet.* 2023.
4. Tambuyzer E, Vandendriessche B, Austin CP, Brooks PJ, Larsson K, Miller Needleman KI, et al. Therapies for rare diseases: therapeutic modalities, progress and challenges ahead. *Nat Rev Drug Discov.* 2020;19(2):93-111.
5. Berg JS, Agrawal PB, Bailey DB, Jr., Beggs AH, Brenner SE, Brower AM, et al. Newborn Sequencing in Genomic Medicine and Public Health. *Pediatrics.* 2017;139(2).
6. Roman TS, Crowley SB, Roche MI, Foreman AKM, O'Daniel JM, Seifert BA, et al. Genomic Sequencing for Newborn Screening: Results of the NC NEXUS Project. *Am J Hum Genet.* 2020;107(4):596-611.
7. Adhikari AN, Gallagher RC, Wang Y, Currier RJ, Amatuni G, Bassaganyas L, et al. The role of exome sequencing in newborn screening for inborn errors of metabolism. *Nat Med.* 2020;26(9):1392-7.
8. Ceyhan-Birsoy O, Machini K, Lebo MS, Yu TW, Agrawal PB, Parad RB, et al. A curated gene list for reporting results of newborn genomic sequencing. *Genet Med.* 2017;19(7):809-18.
9. Pereira S, Robinson JO, Gutierrez AM, Petersen DK, Hsu RL, Lee CH, et al. Perceived Benefits, Risks, and Utility of Newborn Genomic Sequencing in the BabySeq Project. *Pediatrics.* 2019;143(Suppl 1):S6-s13.
10. Downie L, Halliday J, Lewis S, Amor DJ. Principles of Genomic Newborn Screening Programs: A Systematic Review. *JAMA Netw Open.* 2021;4(7):e2114336.
11. Ceyhan-Birsoy O, Murry JB, Machini K, Lebo MS, Yu TW, Fayer S, et al. Interpretation of Genomic Sequencing Results in Healthy and Ill Newborns: Results from the BabySeq Project. *Am J Hum Genet.* 2019;104(1):76-93.
12. Timmins GT, Wynn J, Saami AM, Espinal A, Chung WK. Diverse Parental Perspectives of the Social and Educational Needs for Expanding Newborn Screening through Genomic Sequencing. *Public Health Genomics.* 2022:1-8.
13. Downie L, Halliday JL, Burt RA, Lunke S, Lynch E, Martyn M, et al. A protocol for whole-exome sequencing in newborns with congenital deafness: a prospective population-based cohort. *BMJ Paediatr Open.* 2017;1(1):e000119.
14. Kingsmore SF, Smith LD, Kunard CM, Bainbridge M, Batalov S, Benson W, et al. A genome sequencing system for universal newborn screening, diagnosis, and precision medicine for severe genetic diseases. *Am J Hum Genet.* 2022;109(9):1605-19.
15. Presseau J, McCleary N, Lorencatto F, Patey AM, Grimshaw JM, Francis JJ. Action, actor, context, target, time (AACTT): a framework for specifying behaviour. *Implementation Science.* 2019;14(1):102.
16. Harris PA, Taylor R, Minor BL, Elliott V, Fernandez M, O'Neal L, et al. The REDCap consortium: Building an international community of software platform partners. *Journal of Biomedical Informatics.* 2019;95:103208.
17. Harris PA, Taylor R, Thielke R, Payne J, Gonzalez N, Conde JG. Research electronic data capture (REDCap)—A metadata-driven methodology and workflow process for

- 1  
2  
3 providing translational research informatics support. *Journal of Biomedical Informatics*.  
4 2009;42(2):377-81.
- 5  
6 18. Bombard Y, Clausen M, Shickh S, Mighton C, Casalino S, Kim THM, et al. Effectiveness  
7 of the Genomics ADvISER decision aid for the selection of secondary findings from genomic  
8 sequencing: a randomized clinical trial. *Genetics in Medicine*. 2020;22(4):727-35.
- 9  
10 19. Shickh S, Rafferty SA, Clausen M, Kodida R, Mighton C, Panchal S, et al. The role of  
11 digital tools in the delivery of genomic medicine: enhancing patient-centered care. *Genetics  
12 in Medicine*. 2021;23(6):1086-94.
- 13  
14 20. Bombard Y, Clausen M, Mighton C, Carlsson L, Casalino S, Glogowski E, et al. The  
15 Genomics ADvISER: development and usability testing of a decision aid for the selection of  
16 incidental sequencing results. *European Journal of Human Genetics*. 2018;26(7):984-95.
- 17  
18 21. Shickh S, Hirjikaka D, Clausen M, Kodida R, Mighton C, Reble E, et al. *Genetics  
19 Adviser: a protocol for a mixed-methods randomised controlled trial evaluating a digital  
20 platform for genetics service delivery*. *BMJ Open*. 2022;12(4):e060899.
- 21  
22 22. Tariman JD, Berry DL, Halpenny B, Wolpin S, Schepp K. Validation and testing of the  
23 Acceptability E-scale for web-based patient-reported outcomes in cancer care. *Appl Nurs  
24 Res*. 2011;24(1):53-8.
- 25  
26 23. Marteau TM, Bekker H. The development of a six-item short-form of the state scale  
27 of the Spielberger State-Trait Anxiety Inventory (STAI). *Br J Clin Psychol*. 1992;31(3):301-6.
- 28  
29 24. Brehaut JC, O'Connor AM, Wood TJ, Hack TF, Siminoff L, Gordon E, et al. Validation  
30 of a decision regret scale. *Medical decision making : an international journal of the Society  
31 for Medical Decision Making*. 2003;23(4):281-92.
- 32  
33 25. Grant PE, Pampaka M, Payne K, Clarke A, McAllister M. Developing a short-form of  
34 the Genetic Counselling Outcome Scale: The Genomics Outcome Scale. *Eur J Med Genet*.  
35 2019;62(5):324-34.
- 36  
37 26. Vears DF, Gillam L. Inductive content analysis: A guide for beginning qualitative  
38 researchers. *Focus on Health Professional Education*. 2022;23(1):111-27.
- 39  
40 27. Briggs A, Sculpher M, Claxton K. *Decision modelling for health economic evaluation*.  
41 Oxford: Oxford University Press; 2006.
- 42  
43 28. Hauber AB, González JM, Groothuis-Oudshoorn CG, Prior T, Marshall DA,  
44 Cunningham C, et al. *Statistical Methods for the Analysis of Discrete Choice Experiments: A  
45 Report of the ISPOR Conjoint Analysis Good Research Practices Task Force*. *Value Health*.  
46 2016;19(4):300-15.
- 47  
48 29. Reed Johnson F, Lancsar E, Marshall D, Kilambi V, Mühlbacher A, Regier DA, et al.  
49 *Constructing experimental designs for discrete-choice experiments: report of the ISPOR  
50 Conjoint Analysis Experimental Design Good Research Practices Task Force*. *Value Health*.  
51 2013;16(1):3-13.
- 52  
53  
54  
55  
56  
57  
58  
59  
60

1  
2  
3 Figure 1: The three phases of the BabyScreen+ study including data collection tools and  
4  
5 research focus areas. \*refer to Table 1 for survey and interview measures.  
6  
7  
8  
9

10 Figure 2: Participation process for birth parents. Solid lines represent the expected end-to-  
11  
12 end study pathway (offer to result and final surveys), dashed lines represent anticipated  
13  
14 study exit pathways. \*Participants not able to complete enrolment in English will be  
15  
16 supported by a genetic counsellor and an interpreter. HCP, healthcare professional; NBS,  
17  
18 newborn bloodspot screening; T1-T4, survey timepoints/identifiers.  
19  
20  
21  
22  
23  
24  
25  
26  
27  
28  
29  
30  
31  
32  
33  
34  
35  
36  
37  
38  
39  
40  
41  
42  
43  
44  
45  
46  
47  
48  
49  
50  
51  
52  
53  
54  
55  
56  
57  
58  
59  
60

**Pre-implementation**

**Implementation**

**Post-implementation**

Study process

**Study design**

**Eligibility & recruitment**

**Enrolment & consent**

**Testing**

**Results**

**Evaluation**

Data collection tools

Key informant interviews  
Focus groups  
Process mapping  
Discrete choice experiments

Laboratory data  
Parental surveys and interviews\*

Interviews  
Process mapping  
Downstream healthcare use

Focus areas

Acceptability - public and professional views

Feasibility  
Acceptability - family experience and attitudes  
  
For peer review only - <http://bmjopen.bmj.com/site/about/guidelines.xhtml>

Diagnostic performance & clinical utility  
Implementation experience  
Ethical issues  
Health economic analysis  
Lifetime use of genomic data

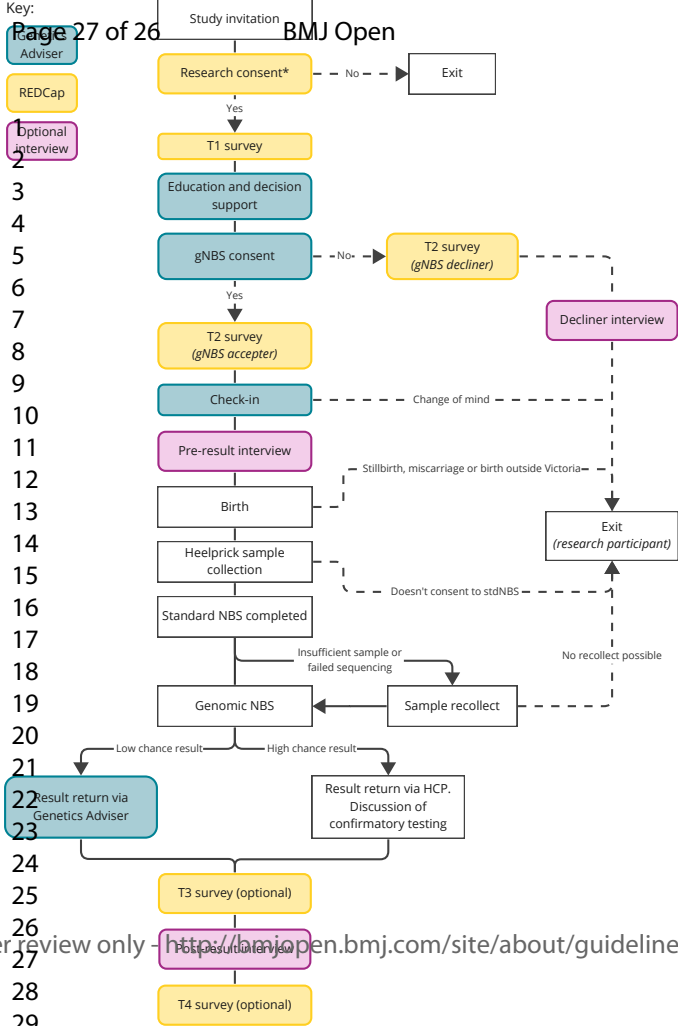

# BMJ Open

## Prospective cohort study of genomic newborn screening: BabyScreen+ pilot study protocol

|                               |                                                                                                                                                                                                                                                                                                                                                                                                                                                                                                                                                                                                                                                                                                                                                                                                                                                                                                                                                                                                                                                                                                                                                                                                                                                                                                                                                                                                                                                                                                                                                                                                                                                                                                                                                                                                                                                                                                                                                                                                                                                                                                                                                                                                                                          |
|-------------------------------|------------------------------------------------------------------------------------------------------------------------------------------------------------------------------------------------------------------------------------------------------------------------------------------------------------------------------------------------------------------------------------------------------------------------------------------------------------------------------------------------------------------------------------------------------------------------------------------------------------------------------------------------------------------------------------------------------------------------------------------------------------------------------------------------------------------------------------------------------------------------------------------------------------------------------------------------------------------------------------------------------------------------------------------------------------------------------------------------------------------------------------------------------------------------------------------------------------------------------------------------------------------------------------------------------------------------------------------------------------------------------------------------------------------------------------------------------------------------------------------------------------------------------------------------------------------------------------------------------------------------------------------------------------------------------------------------------------------------------------------------------------------------------------------------------------------------------------------------------------------------------------------------------------------------------------------------------------------------------------------------------------------------------------------------------------------------------------------------------------------------------------------------------------------------------------------------------------------------------------------|
| Journal:                      | <i>BMJ Open</i>                                                                                                                                                                                                                                                                                                                                                                                                                                                                                                                                                                                                                                                                                                                                                                                                                                                                                                                                                                                                                                                                                                                                                                                                                                                                                                                                                                                                                                                                                                                                                                                                                                                                                                                                                                                                                                                                                                                                                                                                                                                                                                                                                                                                                          |
| Manuscript ID                 | bmjopen-2023-081426.R1                                                                                                                                                                                                                                                                                                                                                                                                                                                                                                                                                                                                                                                                                                                                                                                                                                                                                                                                                                                                                                                                                                                                                                                                                                                                                                                                                                                                                                                                                                                                                                                                                                                                                                                                                                                                                                                                                                                                                                                                                                                                                                                                                                                                                   |
| Article Type:                 | Protocol                                                                                                                                                                                                                                                                                                                                                                                                                                                                                                                                                                                                                                                                                                                                                                                                                                                                                                                                                                                                                                                                                                                                                                                                                                                                                                                                                                                                                                                                                                                                                                                                                                                                                                                                                                                                                                                                                                                                                                                                                                                                                                                                                                                                                                 |
| Date Submitted by the Author: | 13-Dec-2023                                                                                                                                                                                                                                                                                                                                                                                                                                                                                                                                                                                                                                                                                                                                                                                                                                                                                                                                                                                                                                                                                                                                                                                                                                                                                                                                                                                                                                                                                                                                                                                                                                                                                                                                                                                                                                                                                                                                                                                                                                                                                                                                                                                                                              |
| Complete List of Authors:     | <p>Lunke, Sebastian; Murdoch Children's Research Institute, Victorian Clinical Genetics Services; University of Melbourne</p> <p>Bouffler, Sophie; Australian Genomics Health Alliance; Murdoch Children's Research Institute</p> <p>Downie, Lilian; Murdoch Children's Research Institute, Victorian Clinical Genetics Service; University of Melbourne</p> <p>Caruana, Jade; Murdoch Children's Research Institute</p> <p>Amor, David J.; Murdoch Children's Research Institute; University of Melbourne</p> <p>Archibald, Alison; Murdoch Children's Research Institute, Victorian Clinical Genetics Services; University of Melbourne</p> <p>Bombard, Yvonne; St Michael's Hospital, Genomics Health Services Research Program; University of Toronto, Institute of Health Policy, Management and Evaluation</p> <p>Christodoulou, John; Murdoch Children's Research Institute, Brain and Mitochondrial Research Group; The University of Melbourne, Department of Paediatrics</p> <p>Clausen, Marc; St Michael's Hospital, Genomics Health Services Research Program</p> <p>De Fazio, Paul; Murdoch Children's Research Institute, Victorian Clinical Genetics Services</p> <p>Greaves, Ronda; Murdoch Children's Research Institute, Victorian Clinical Genetics Services; University of Melbourne</p> <p>Hollizeck, Sebastian; Murdoch Children's Research Institute, Victorian Clinical Genetics Services</p> <p>Kanga-Parabia, Anaita; University of Melbourne; Murdoch Children's Research Institute</p> <p>Lang, Nitzan; Murdoch Children's Research Institute, Victorian Clinical Genetics Services</p> <p>Lynch, Fiona; University of Melbourne</p> <p>Peters, Riccarda; University of Melbourne</p> <p>Sadedin, Simon; Murdoch Children's Research Institute, Victorian Clinical Genetics Services</p> <p>Tutty, Erin; University of Melbourne; Murdoch Children's Research Institute</p> <p>Eggers, Stefanie; Murdoch Children's Research Institute, Victorian Clinical Genetics Services</p> <p>Lee, Crystle; Murdoch Children's Research Institute, Victorian Clinical Genetics Services</p> <p>Wall, Meaghan; Murdoch Children's Research Institute, Victorian Clinical Genetics Services; University of Melbourne</p> |

|                                 |                                                                                                                                                                                                                                                                                                                                                                                                                                                                                                                                                                                                                                                                                                                                                                                     |
|---------------------------------|-------------------------------------------------------------------------------------------------------------------------------------------------------------------------------------------------------------------------------------------------------------------------------------------------------------------------------------------------------------------------------------------------------------------------------------------------------------------------------------------------------------------------------------------------------------------------------------------------------------------------------------------------------------------------------------------------------------------------------------------------------------------------------------|
|                                 | Yeung, Alison ; Murdoch Children's Research Institute, Victorian Clinical Genetics Services; University of Melbourne<br>Gaff , Clara; Walter and Eliza Hall Institute of Medical Research, Melbourne Genomics Health Alliance ; University of Melbourne<br>Gyngell, Christopher; University of Melbourne; Murdoch Children's Research Institute<br>Vears, Danya F; University of Melbourne; Murdoch Children's Research Institute<br>Best, Stephanie; Peter MacCallum Cancer Centre, Department of Health Services Research; Australian Genomics Health Alliance<br>Goranitis, I; University of Melbourne; Australian Genomics Health Alliance<br>Stark, Zornitza; Murdoch Children's Research Institute, Victorian Clinical Genetics Services; Australian Genomics Health Alliance |
| <b>Primary Subject Heading</b>: | Genetics and genomics                                                                                                                                                                                                                                                                                                                                                                                                                                                                                                                                                                                                                                                                                                                                                               |
| Secondary Subject Heading:      | Health services research                                                                                                                                                                                                                                                                                                                                                                                                                                                                                                                                                                                                                                                                                                                                                            |
| Keywords:                       | GENETICS, PAEDIATRICS, Health policy < HEALTH SERVICES ADMINISTRATION & MANAGEMENT                                                                                                                                                                                                                                                                                                                                                                                                                                                                                                                                                                                                                                                                                                  |
|                                 |                                                                                                                                                                                                                                                                                                                                                                                                                                                                                                                                                                                                                                                                                                                                                                                     |

SCHOLARONE™  
Manuscripts

## Prospective cohort study of genomic newborn screening: BabyScreen+ pilot study protocol

Sebastian Lunke<sup>1,2</sup>, Sophie E Bouffler<sup>3,4</sup>, Lilian Downie<sup>1,2</sup>, Jade Caruana<sup>4</sup>, David J Amor<sup>2,4</sup>,  
Alison D Archibald<sup>1,2</sup>, Yvonne Bombard<sup>5,6</sup>, John Christodoulou<sup>2,4</sup>, Marc Clausen<sup>5</sup>, Paul De  
Fazio<sup>1</sup>, Ronda F Greaves<sup>1,2</sup>, Sebastian Hollizeck<sup>1</sup>, Anaita Kanga-Parabia<sup>2,4</sup>, Nitzan Lang<sup>1</sup>, Fiona  
Lynch<sup>2</sup>, Riccarda Peters<sup>2</sup>, Simon Sadedin<sup>1</sup>, Erin Tutty<sup>2,4</sup>, Stefanie Eggers<sup>1</sup>, Crystle Lee<sup>1</sup>,  
Meaghan Wall<sup>1,2</sup>, Alison Yeung<sup>1,2</sup>, Clara L Gaff<sup>2,7</sup>, Christopher Gyngell<sup>2,4</sup>, Danya F Vears<sup>2,4</sup>,  
Stephanie Best<sup>3,8</sup>, Ilias Goranitis<sup>2,3</sup>, Zornitza Stark<sup>1,3</sup>

<sup>1</sup>Victorian Clinical Genetics Services, Murdoch Children's Research Institute, Melbourne,  
Australia

<sup>2</sup>University of Melbourne, Melbourne, Australia

<sup>3</sup>Australian Genomics, Melbourne, Australia

<sup>4</sup>Murdoch Children's Research Institute, Melbourne, Australia

<sup>5</sup>Genomics Health Services Research Program, St. Michael's Hospital, Unity Health Toronto,  
Toronto, Ontario, Canada

<sup>6</sup>Institute of Health Policy, Management and Evaluation, University of Toronto, Toronto,  
Ontario, Canada

<sup>7</sup>Melbourne Genomics Health Alliance, Melbourne Australia

<sup>8</sup>Department of Health Services Research, Peter MacCallum Cancer Centre, Melbourne,  
Victoria, Australia

**Corresponding authors:** Sebastian Lunke, [Sebastian.lunke@mcri.edu.au](mailto:Sebastian.lunke@mcri.edu.au), Murdoch  
Children's Research Institute, Melbourne, VIC, Australia. Zornitza Stark,  
[Zornitza.stark@vcgs.org.au](mailto:Zornitza.stark@vcgs.org.au), Victorian Clinical Genetics Services, VIC, Australia.



## ABSTRACT

**Introduction:** Newborn bloodspot screening (NBS) is a highly successful public health program that utilises biochemical and other assays to screen for severe but treatable childhood-onset conditions. Introducing genomic sequencing into NBS programs increases the range of detectable conditions but raises practical and ethical issues. Evidence from prospectively ascertained cohorts is required to guide policy and future implementation.

This study aims to develop, implement, and evaluate a genomic NBS (gNBS) pilot program.

**Methods and analysis:** The BabyScreen+ study will pilot gNBS in three phases. In the pre-implementation phase, study materials, including education resources, decision support and data collection tools, will be designed. Focus groups and key informant interviews will also be undertaken to inform delivery of the study and future gNBS programs. During the implementation phase, we will prospectively recruit birth parents in Victoria, Australia, to screen 1000 newborns for over 600 severe, treatable, childhood-onset conditions. Clinically accredited whole genome sequencing will be performed following standard NBS using the same sample. High chance results will be returned by genetic healthcare professionals, with follow-on genetic and other confirmatory testing and referral to specialist services as required. The post-implementation phase will evaluate the feasibility of gNBS as the primary aim, and assess ethical, implementation, psychosocial, and health economic factors to inform future service delivery.

**Ethics and dissemination:** This project received ethics approval from the Royal Children's Hospital Melbourne Research Ethics Committee: HREC/91500/RCHM-2023, HREC/90929/RCHM-2022 and HREC/91392/RCHM-2022. Findings will be disseminated to policy makers, and through peer-reviewed journals and conferences.

1  
2  
3 **Word count:** 3049  
4

5 **Keywords:** Genomic newborn screening, rare disease, genomics, implementation  
6  
7  
8  
9  
10  
11  
12  
13  
14  
15  
16  
17  
18  
19  
20  
21  
22  
23  
24  
25  
26  
27  
28  
29  
30  
31  
32  
33  
34  
35  
36  
37  
38  
39  
40  
41  
42  
43  
44  
45  
46  
47  
48  
49  
50  
51  
52  
53  
54  
55  
56  
57  
58  
59  
60

For peer review only

## ARTICLE SUMMARY

### Strengths and limitations of this study

- A prospective feasibility study to offer genomic newborn screening to birth parents during pregnancy.
- The study includes a multidisciplinary evaluation approach ascertaining perspectives from public, health professionals and participating parents.
- The study will utilise online recruitment tools to facilitate education and consent to allow scaling up for a future screening program. Interpreter-assisted recruitment is available for people who use a language other than English.
- Recruitment will encompass birth parents in the private and public healthcare system, however, may not be representative of the wider population as this is a pilot study.
- As this is a pilot study, we are unable to fully assess the value of stored genomic data for lifelong healthcare use.

## INTRODUCTION

Newborn bloodspot screening (NBS) is a well-established and highly successful public health intervention that has enabled the early diagnosis and prompt treatment of many severe childhood conditions.(1) Traditionally, NBS programs select conditions for inclusion using the classic Wilson and Jungner screening principles,(2) and employ targeted biochemical and other assays that can be delivered at scale with rapid turnaround times and at a relatively low cost. Wide variability exists between, and even within, countries in the number of conditions included, ranging from nine in the United Kingdom to 80 in California, USA.(1, 3-

1  
2  
3 5) Currently in Australia, NBS programs are funded by state and territory governments and  
4  
5 screen for around 27 conditions.(6)  
6  
7  
8  
9

10 In the last decade, the use of genomic sequencing in the research and clinical setting has  
11 transformed rare disease diagnosis.(3) At the same time, increased understanding of the  
12 underlying molecular mechanisms of disease has accelerated the development of precision  
13 treatments.(7) The gap between the number of rare diseases now considered 'treatable'(8)  
14 and those included in NBS programs is expanding rapidly. Integrating genomic sequencing  
15 into NBS programs would enable screening for a much broader range of conditions, while  
16 also providing the flexibility to quickly add more conditions at low incremental cost.  
17  
18  
19  
20  
21  
22  
23  
24  
25  
26  
27  
28  
29

30 The concept of performing genomic sequencing in all children at birth, termed genomic  
31 newborn screening (gNBS), has been extensively debated. Empirical evidence to guide  
32 decision-making is starting to emerge,(9-13) addressing important questions of test design,  
33 diagnostic performance, and clinical utility, as well as parental and healthcare professionals'  
34 (HCP) views and concerns.(14-18) However, evidence from prospective cohorts is limited,  
35 with the most extensively evaluated cohort, the BabySeq study,(19) having recruited 159  
36 infants.  
37  
38  
39  
40  
41  
42  
43  
44  
45  
46  
47  
48  
49

50 Many concerns have been raised, including reduced sensitivity of genomic testing for some  
51 of the metabolic conditions screened via standard NBS (stdNBS),(11) and the appropriate  
52 timing and means of parental education to ensure informed consent.(20) None of the  
53 studies to date have fully addressed the key questions of acceptability, feasibility, scalability,  
54 and cost-effectiveness of gNBS. Most have focussed on the clinical, legal, insurance, and  
55  
56  
57  
58  
59  
60

1  
2  
3 social contexts in the USA,(1, 10, 11, 13, 19, 20) which have limited applicability to the  
4  
5 Australian and other public healthcare systems. Several large-scale newborn genomic  
6  
7 screening studies are currently launching worldwide to address these gaps in knowledge.(3,  
8  
9 21, 22)

10  
11  
12  
13  
14  
15 Our prospective cohort study, BabyScreen+, will address many of these questions in an  
16  
17 Australian context to inform a future population-scale gNBS program. We will perform gNBS  
18  
19 for a cohort of 1000 Victorian newborns using whole genome sequencing (WGS) that will  
20  
21 increase the range of conditions screened in stdNBS to over 600 treatable, childhood-onset  
22  
23 conditions. Insights from our research will be used to design laboratory processes that can  
24  
25 deliver clinically accredited gNBS in an appropriate timeframe and at population scale. In  
26  
27 addition, our study will inform the design of pre- and post-test processes, including  
28  
29 education, decision support, informed consent, and results management, aimed at  
30  
31 facilitating understanding and acceptance of gNBS for parents, HCP, and the Australian  
32  
33 public.  
34  
35  
36  
37  
38  
39  
40  
41

## 42 **METHODS AND ANALYSIS**

### 43 **Study design**

44  
45 The BabyScreen+ study will involve three phases, as outlined in Figure 1. Following the  
46  
47 design and implementation of education and consent materials, research data collection  
48  
49 tools, and laboratory pathways, we will offer and evaluate the feasibility of gNBS. Clinically  
50  
51 accredited gNBS will be performed for over 600 treatable, childhood-onset conditions  
52  
53 following stdNBS. Evaluation will focus on the health economic, implementation science,  
54  
55 psychosocial, and ethical aspects of gNBS.  
56  
57  
58  
59  
60

## Study aims

The overall aim of this study is to design and deliver a gNBS program to screen 1000 prospectively recruited newborns and assess feasibility.

Secondary aims are to evaluate:

- Public preferences and perspectives for the delivery of gNBS
- Ethical issues
- Performance of gNBS alongside stdNBS, comparing diagnostic performance, and clinical utility
- Parental screening experience and psychosocial outcomes
- Cost-effectiveness and cost-benefit of gNBS relative to stdNBS
- Implementation of gNBS, including acceptability to HCP, parents, and the public
- Value and ethical implications of using genomic data generated at birth as a lifelong healthcare resource

## Study timetable and sites

The pre-implementation phase of the study commenced in July 2022 (Figure 1). Staged recruitment into the implementation phase of the study began on 20 July 2023 at three sites, including a private obstetrics practice and two public hospitals. The post-implementation phase will commence at the completion of recruitment, and the study will be completed by 31 May 2027.

## Pre-implementation phase

1  
2  
3 The pre-implementation phase comprises the design, development, and testing of study  
4 processes and materials. These include HCP education materials; the online enrolment,  
5  
6 decision support, education, and consent platform; evaluation data collection tools; the list  
7  
8 of genes for inclusion in screening; and laboratory protocols. Key informant interviews,  
9  
10  
11 focus groups, and discrete choice experiments will be undertaken to assess public and HCP  
12  
13  
14 views on study processes and acceptability of gNBS.  
15  
16  
17  
18  
19  
20

### 21 Condition and gene selection

22  
23 The overarching condition selection principles that are used in stdNBS were maintained  
24  
25 when considering which genes and conditions to include in this study.(2) Included  
26  
27 conditions:  
28

- 29  
30 • have a well-established gene-disease association and the majority of known  
31  
32 clinically relevant variants are ascertainable by WGS
- 33  
34 • are considered severe (i.e., causing mortality or considerable morbidity/disability in  
35  
36 the majority of affected children if untreated),
- 37  
38 • have early-onset of disease or significantly benefit from early intervention (<5 years  
39  
40 of age in the majority), and
- 41  
42 • have an available treatment (e.g., drugs/supplements, enzyme replacement  
43  
44 therapy, organ or bone marrow transplant, diet modification, gene therapy) or  
45  
46 other intervention that significantly alters the natural progression of the condition.  
47  
48  
49

50 Interventions must be accessible to study participants in Victoria, Australia.  
51  
52  
53  
54  
55  
56

57 We included all conditions that are currently screened in stdNBS in Australia. The gene  
58  
59 selection process and panel content has been informed by prior local and international  
60

1  
2  
3 gNBS projects.(21, 23) Genes included in the study are publicly available for review and  
4  
5 comment on PanelApp Australia (BabyScreen+ newborn screening panel:  
6  
7 <https://panelapp.gha.umccr.org/panels/3931/>; Supplementary Table 1) and on the study  
8  
9 website along with a plain language description of the gene selection process and screening  
10  
11 approach.  
12  
13  
14

### 17 Key informant interviews

18  
19  
20 The implementation phase will be informed by interviews with key stakeholders involved in  
21  
22 the current delivery of stdNBS. These include laboratory staff, HCP offering stdNBS, other  
23  
24 antenatal HCP, and paediatric physicians. Data collection and analysis will be guided by the  
25  
26 Action, Actor, Context, Target, Time (AACTT) framework(24) to capture views on who should  
27  
28 do what and when. Interviews will explore opinions on offering gNBS; education and  
29  
30 consent; sample collection and testing; and result management.  
31  
32  
33  
34  
35

### 37 Eliciting public preferences and perspectives

38  
39  
40 Public preferences and values will be sought through a multi-phase mixed-methods design  
41  
42 involving focus groups and discrete choice experiment surveys (DCEs) with members of the  
43  
44 Australian public. Focus groups will explore public preferences and perspectives for 1)  
45  
46 implementation of gNBS, 2) risks and benefits of gNBS, and 3) use of data generated by  
47  
48 gNBS as a lifetime resource and will involve qualitative exploration through facilitated  
49  
50 discussion to elicit characteristics of gNBS delivery. Outcomes from the focus groups will be  
51  
52 used to inform the implementation phase of the study. The DCE surveys will elicit public  
53  
54 preferences, values, and priorities for gNBS to support the economic evaluation and  
55  
56 implementation of gNBS in Australia.  
57  
58  
59  
60



## Implementation phase

### HCP engagement

We will invite HCP from selected public and private healthcare settings to offer the study to their patients. HCP participation is voluntary and will not be incentivised. HCP who wish to be involved will receive education and support from the study team regarding gNBS and study processes.

### Participant eligibility and recruitment

Pregnant individuals will be invited to take part in the third trimester. At one public hospital, recruitment will also occur via advertisement on a digital pregnancy care platform. To be eligible to participate, birth parents must be due to give birth in Victoria, Australia, within the study timeframe, and participate in the state-based stdNBS. They must be aged 16 years or over, or have a legal representative capable of providing informed consent on their behalf. Enrolment must be completed by two weeks after their baby is born. This timeframe allows for exceptional circumstances, e.g., premature delivery, where enrolment is not completed before birth. However, in the majority of cases we expect enrolment to be completed during pregnancy. The study team will follow up incomplete enrolments two weeks before the expected due date to ensure that results can be returned in a clinically meaningful timeframe.

## Enrolment and Consent

After receiving a study invitation, birth parents will complete enrolment and consent for the study online. gNBS and all required pre- and post-test support will be offered at no cost to birth parents. Figure 2 provides a detailed outline of the participation process.

Birth parents will first be asked to provide consent for the research component of the study via Research Electronic Data Capture (REDCap).(25, 26) This encompasses collection of personal and health related data and survey responses. Participants who use a language other than English will be assisted to enrol and take part by a research genetic counsellor and an interpreter.

Birth parents who consent to research will receive education and decision support, as well as provide informed consent to clinical gNBS for their baby, via the online Genetics Adviser platform. Genetics Adviser is a patient-centred interactive online tool that provides educational, decisional, and counselling support to patients undergoing genetic testing, along with managing consent capture and return of results (<https://www.geneticsadviser.com/>). Genetics Adviser has been extensively evaluated and improved by iterative co-design and has been shown to improve participant knowledge and decisional confidence.(27-30) The study will use a locally deployed version of the platform, adapted in collaboration with the Genetics Adviser team.

A 'check-in' module in Genetics Adviser will automatically remind birth parents about the study four weeks prior to their estimated due date via email and SMS. Participants will be invited to log back into Genetics Adviser via email and SMS, where they will receive a brief

1  
2  
3 refresher on gNBS, explore how they are currently feeling, and have the option to review  
4  
5 their gNBS consent.  
6  
7  
8  
9

10 Genetic counselling is available at any time, if requested. Consent to research participation  
11  
12 can be withdrawn at any time. Consent to clinical gNBS can be withdrawn at any time prior  
13  
14 to result reporting.  
15  
16  
17

### 18 19 20 Sample testing

21  
22 Sample collection will be performed by the pregnancy service provider as part of stdNBS  
23  
24 undertaken by Victorian Clinical Genetics Services (VCGS). StdNBS is expected to take up to  
25  
26 two weeks. In order to comply with local requirements for access to NBS cards and avoid  
27  
28 interference with stdNBS, BabyScreen+ will only have access to the sample once the routine  
29  
30 process is complete. Following completion of stdNBS, four 3mm punches will be taken from  
31  
32 a single dried blood spot and processed using clinically accredited protocols and procedures  
33  
34 at VCGS. DNA will be extracted using the Omega Biotek Mag-Bind DNA Blood and Tissue kit.  
35  
36 Following DNA extraction, PCR-free genome sequencing libraries will be created using the  
37  
38 PCR-free DNA prep kit (Illumina) and sequenced using a 2x150 base paired end read  
39  
40 configuration to an average depth of 30x on NovaSeq 6000 of X Plus instruments (Illumina).  
41  
42  
43  
44  
45  
46  
47 The target timeframe for return of results following handover of the punches from the  
48  
49 stdNBS laboratory is two weeks. Considering the two blocks of two weeks, results will be  
50  
51 returned within four weeks of sample collection. For samples with insufficient quantity or  
52  
53 quality of DNA, the study team will contact the participant to arrange sample recollection.  
54  
55  
56  
57  
58  
59  
60

1  
2  
3 Genome data analysis and interpretation will be performed using validated and clinically  
4 accredited, cloud-based analysis pipelines and procedures, using the Dragen and eMedgene  
5 (Illumina) analysis tools, with custom in-house filtering configuration. Interpretation will be  
6 restricted to genes on the BabyScreen+ gNBS panel, and only variants that are classified as  
7 likely pathogenic or pathogenic will be considered for reporting. We will not report carrier  
8 status, adult-onset conditions, or variants of uncertain significance. All variants that are  
9 considered for reporting will be discussed by a team of clinical specialists, genetic  
10 pathologists, and medical scientists.  
11  
12  
13  
14  
15  
16  
17  
18  
19  
20  
21  
22  
23  
24  
25

#### 26 Screening results

27 There will be two categories of result:

- 28 1) A low chance result, where no reportable variants are identified, or
- 29 2) A high chance result, where one or more reportable variants are identified.

30  
31  
32  
33  
34  
35  
36  
37 *For low chance results*, birth parents will be informed via the online Genetics Adviser  
38 platform following notification of result availability via email and SMS. Genetic counselling  
39 follow-up will be available on request.  
40  
41  
42  
43  
44  
45  
46

47 *For high chance results*, birth parents will receive a phone call from a genetics HCP to discuss  
48 the result, arrange an appointment and any required additional testing (including  
49 confirmation of reported variants), as well as referral to specialist services. Further genetic  
50 counselling support will also be available.  
51  
52  
53  
54  
55  
56  
57  
58  
59  
60

## Post-implementation phase

The study will move to the post-implementation phase after recruitment, with a focus on evaluation and data analysis. See Figure 1 and Figure 2 for details on the data collection tools, timepoints, and evaluation focus areas.

### Evaluation

Feasibility will be evaluated through a set of key performance indicators gathered from laboratory data. This includes data on the percentage of study samples that:

- Are successfully identified from stdNBS samples
- Require a recollect due to insufficient DNA
- Fail sequencing
- Are processed within the expected turn-around time
- Have a concordant high chance result from stdNBS and gNBS

Performance of gNBS will be further evaluated against stdNBS where a genetic diagnosis is confirmed. We will collect data on subsequent clinical management, including the timing of commencement of therapies and downstream healthcare utilisation. Where possible, we will compare this against historical controls from VCGS and the Royal Children's Hospital (RCH) (patients diagnosed with the same disorder in the last 10 years). Cost-effectiveness and cost-benefit analyses will be conducted to evaluate whether the additional cost of gNBS relative to stdNBS is outweighed by longer-term cost-savings and improvements in diagnostic, clinical, and personal outcomes for children and families. Clinical and laboratory data from RCH and VCGS will be accessed and examined to establish if and for what purpose

1  
2  
3 genomic data generated at birth has been accessed and/or re-analysed within five years  
4  
5 post-result.  
6  
7  
8  
9

10 Views on acceptability and participant experiences will be collected during the first two  
11  
12 phases of the study. Participant, public and HCP views will be captured through key  
13  
14 informant interviews, focus groups, surveys, and discrete choice experiments (see Figures 1  
15  
16 and 2 and Table 1). Participants will complete compulsory surveys at enrolment (T1) and  
17  
18 after consent (T2), followed by optional surveys at 3-months post-result (T3) and ~12-  
19  
20 months post-result (T4). Participants will also be invited to take part in interviews before  
21  
22 and after receiving their gNBS results. Participants who decline gNBS will be asked to  
23  
24 complete a modified T2 survey and invited to take part in an interview. Refer to Table 1 for  
25  
26 survey and interview measures.  
27  
28  
29  
30  
31  
32  
33  
34

35 Table 1: Survey and interview measures used to ascertain parental experiences and  
36  
37 preferences throughout the study  
38  
39

| Measure                               | Description                                                                                                                                                                                                                                            | T1 | T2 | Pre-<br>result<br>int | T3 | Post-<br>result<br>int | T4 | Decliner<br>int |
|---------------------------------------|--------------------------------------------------------------------------------------------------------------------------------------------------------------------------------------------------------------------------------------------------------|----|----|-----------------------|----|------------------------|----|-----------------|
| Details of pregnancy and demographics | Estimated due date, intended birth hospital, sex of baby (if known), twin/triplet pregnancy details (if applicable), education, income, language, marital status, number of children, prior experience with genomic testing, family history, ancestry. | X  |    |                       |    |                        |    |                 |
| Acceptability E-scale                 | Seven-item scale to determine the acceptability and                                                                                                                                                                                                    |    | X  |                       |    |                        |    |                 |

|                                                         |                                                                                                                                                                                                                                       |  |   |  |   |  |   |  |
|---------------------------------------------------------|---------------------------------------------------------------------------------------------------------------------------------------------------------------------------------------------------------------------------------------|--|---|--|---|--|---|--|
| [gNBS acceptor]                                         | usability of computerised health-related programs(31).                                                                                                                                                                                |  |   |  |   |  |   |  |
| Information in Genetics Adviser [gNBS acceptor]         | Three study-specific questions to assess the perceived bias of Genetics Adviser content and review/influence of the study gene list.                                                                                                  |  | X |  |   |  |   |  |
| Knowledge of gNBS [gNBS acceptor]                       | Eight study-specific True/False questions to determine participants' understanding of gNBS.                                                                                                                                           |  | X |  | X |  | X |  |
| Difficulty and deliberation of decision [gNBS acceptor] | Three study-specific questions to assess the level of difficulty making a decision, length of deliberation and sources of information used when consenting to gNBS.                                                                   |  | X |  |   |  |   |  |
| Reasons for accepting or declining [gNBS acceptor]      | One study-specific question addressing reasons for consenting to gNBS. Participants are asked to rate a selection of reasons on a 5-point Likert scale and asked to comment if there are other reasons not listed.                    |  | X |  |   |  |   |  |
| Willingness to pay [gNBS acceptor]                      | Dynamic triple-bounded dichotomous choice contingent valuation, also known as a 'bidding game', to assess the value participants place on gNBS.                                                                                       |  | X |  | X |  | X |  |
| State trait anxiety index (STAI-AD) [gNBS acceptor]     | 26-item scale measuring state and trait anxiety. <i>Copyright © 1968, 1977 by Charles D. Spielberger. All rights reserved in all media. Published by Mind Garden, Inc. <a href="http://www.mindgarden.com">www.mindgarden.com</a></i> |  | X |  | X |  | X |  |

|                                                  |                                                                                                                                                                                                                                           |  |   |  |   |  |   |  |
|--------------------------------------------------|-------------------------------------------------------------------------------------------------------------------------------------------------------------------------------------------------------------------------------------------|--|---|--|---|--|---|--|
|                                                  | Note: Only the 6 questions that form the STAI-6 short form(32) are repeated at each timepoint.                                                                                                                                            |  |   |  |   |  |   |  |
| Reasons for declining [gNBS decliner]            | One study-specific question exploring the reasons for declining. Participants are presented with 11 reasons and asked to rate how much each one influenced their decision on a scale of 1 (did not influence) to 5 (strongly influenced). |  | X |  |   |  |   |  |
| Result recall                                    | One study-specific question to determine if participants recall their baby's result correctly.                                                                                                                                            |  |   |  | X |  | X |  |
| Decision regret scale                            | Five-item scale to measure regret after a health care decision(33).                                                                                                                                                                       |  |   |  | X |  | X |  |
| Health system utilisation                        | One study-specific question to determine health system utilisation post-result.                                                                                                                                                           |  |   |  | X |  | X |  |
| Result dissemination [high chance result only]   | One study-specific question for people to determine who participants have shared their result with and why.                                                                                                                               |  |   |  | X |  |   |  |
| Genomics Outcome Scale [high chance result only] | Six-item scale based on the Genetic Counselling Outcome Scale-24 adapted to assess outcomes of genetic counselling and patient empowerment.(34)                                                                                           |  |   |  | X |  |   |  |
| Service delivery preferences                     | 10 study-specific questions assessing opinions on if, how, and when gNBS should be offered, and what conditions should be screened.                                                                                                       |  |   |  | X |  |   |  |



|                                                      |                                                                                                      |  |  |   |  |   |   |   |
|------------------------------------------------------|------------------------------------------------------------------------------------------------------|--|--|---|--|---|---|---|
| Experience of gNBS                                   | Questions on prior knowledge of genetic or genomic testing and experiences taking part in the study. |  |  | X |  | X |   | X |
| Expectations of results                              | Questions on expected result and how they plan to use the result.                                    |  |  | X |  |   |   |   |
| Receiving results, understanding, and making meaning | Questions on result including knowledge of outcomes and how they plan to use the result.             |  |  |   |  | X |   |   |
| Attitudes and perceptions                            | Questions on if, how, and when gNBS should be offered, and what conditions should be screened.       |  |  | X |  | X |   | X |
| Decision making                                      | Questions on reasons for declining gNBS.                                                             |  |  |   |  |   |   | X |
| Data re-use                                          | Study-specific questions around preferences for additional analyses of gNBS data.                    |  |  |   |  |   | X |   |
| Future gNBS decision                                 | One study-specific question asking preference for gNBS for future children                           |  |  |   |  |   | X |   |

T1, survey at enrolment; T2, survey post-consent; T3, 3-months post result survey; T4, 12-months post result survey; int, interviews; STAI-6, Six-item State-Trait Anxiety Inventory; STAI-AD, State-Trait Anxiety Inventory for Adults; gNBS, genomic newborn screening.

Health economic analyses will be performed from the perspective of the Australian healthcare system, using a lifetime horizon, and based on the outcomes of cost per additional diagnosis, cost per quality-adjusted life-year gained, and net benefit. A budget impact analysis will be conducted to provide policy-relevant insights into the affordability and sustainability of implementing gNBS.

1  
2  
3 Potential barriers and enablers to implementation of gNBS will be identified to generate  
4 strategies to support successful delivery and inform future studies. These will be ascertained  
5 through theory-informed interviews. This will include capturing the experiences of  
6 professionals including HCP involved in the delivery of gNBS, and those impacted by the  
7 implementation of gNBS, including perinatal HCP and paediatric physicians. In addition,  
8 process mapping will be undertaken with laboratory staff and study team members at  
9 intervals throughout the study to understand adaptations required to deliver gNBS at scale  
10 and within clinically meaningful timeframes.  
11  
12  
13  
14  
15  
16  
17  
18  
19  
20  
21  
22  
23  
24  
25

#### 26 Data analysis

27 Personal identifying information, clinical, and evaluation data will be collected using  
28 recording devices, and electronic data collection forms in the online Genetics Adviser  
29 platform(30) and REDCap,(25, 26) both hosted at the Murdoch Children's Research Institute,  
30 Melbourne, Australia.  
31  
32  
33  
34  
35  
36  
37  
38  
39

40 Findings from interviews and surveys will be used to provide qualitative and statistical  
41 information on the associations between a particular behaviour and opinions or attitudes  
42 about the program. Qualitative data will be either deductively analysed where a theoretical  
43 framework has been employed e.g., AACTT(24) or analysed using inductive content  
44 analysis(35) or thematic analysis to generate rich descriptions responding to the research  
45 aims e.g., acceptability of testing. Economic evaluation and discrete choice experiments will  
46 be conducted according to best practice recommendations.(36-38) Quotes from participants  
47 will be used to illustrate qualitative findings in scientific presentations and other  
48 publications. Statistical analysis will utilise appropriate methods and tests depending on the  
49  
50  
51  
52  
53  
54  
55  
56  
57  
58  
59  
60

1  
2  
3 nature of the data and its normality. Probability values of  $<0.05$  will be considered  
4  
5 statistically significant, and confidence intervals will be calculated where possible.  
6  
7  
8

### 9 **Patient and public involvement**

10  
11 The pre-implementation phase of the study involved extensive consultation with the public  
12  
13 via focus groups and discrete choice experiment surveys. These have informed the design of  
14  
15 the implementation phase. Condition selection has been done in conjunction with patient  
16  
17 support groups. The study also uses Genetics Adviser, a decision support platform with  
18  
19 extensive public input into design and development.(27-30)  
20  
21  
22  
23  
24  
25

### 26 **ETHICS AND DISSEMINATION**

27  
28 This study is governed and administered by the Murdoch Children's Research Institute  
29  
30 (MCRI), Melbourne, Australia. All genetic testing is performed by VCGS, Melbourne,  
31  
32 Australia, a wholly owned not-for-profit subsidiary of MCRI. VCGS is clinically accredited  
33  
34 (NATA/RCPA) to ISO15189:2012 to carry out genetic and genomic testing. The project has  
35  
36 received ethics approval from the Royal Children's Hospital Melbourne Human Research  
37  
38 Ethics Committee (main BabyScreen+ protocol: HREC/91500/RCHM-2023; key informant  
39  
40 interviews: HREC/90929/RCHM-2022; and focus groups and DCE: HREC/91392/RCHM-2022).  
41  
42 Findings from this study will be published in peer-reviewed scientific journal articles and  
43  
44 presented at appropriate clinical and research conferences. The findings will also be  
45  
46 disseminated to policy makers including the Standing Committee on Screening. All  
47  
48 participants have provided informed consent to be involved in this study.  
49  
50  
51  
52  
53  
54  
55  
56  
57  
58  
59  
60

## ACKNOWLEDGEMENTS

The research conducted at the Murdoch Children's Research Institute was supported by the Victorian Government's Operational Infrastructure Support Program. The Chair in Genomic Medicine awarded to JC is generously supported by The Royal Children's Hospital Foundation. YB holds the Canada Research Chair in Genomics Health Services and Policy, funded by the Canada Research Chairs Program.

## AUTHOR CONTRIBUTIONS

All authors contributed to the design of the protocol, including its concept and the critical review and final approval of the manuscript. Sebastian Lunke, Sophie Bouffler and Zornitza Stark drafted the manuscript. Simon Sadedin, Stefanie Eggers, Sebastian Hollizeck, Crystle Lee, Meaghan Wall, Ronda Greaves, Paul De Fazio and Sebastian Lunke contributed to the design of the laboratory processes. David Amor, Lilian Downie, Alison Archibald, John Christodoulou, Alison Yeung, Zornitza Stark and Sebastian Lunke contributed to the design of the gene list. Yvonne Bombard, Marc Clausen, Jade Caruana, Alison Archibald, Lilian Downie, Clara Gaff, Sophie Bouffler, Nitzan Lang, Anaita Kanga-Parabia and Zornitza Stark contributed to the design of participant and HCP education materials. Danya Vears, Fiona Lynch and Christopher Gyngell contributed to the design of the ethical evaluation. Erin Tutty, Anaita Kanga-Parabia, Alison Archibald and Stephanie Best contributed to the design of the psychosocial and implementation evaluation. Riccarda Peters and Ilias Goranitis contributed to the design of the health economic evaluation.

**FUNDING STATEMENT**

The BabyScreen+ study is funded by the Australian Government's Medical Research Future Fund as part of the Genomics Health Futures Mission, grant MRF2015937 titled '*Genomic newborn screening for personalised lifelong healthcare in Australian babies*'.

**COMPETING INTERESTS**

YB and MC are cofounders of the Genetics Adviser. The other authors declare no relevant disclosures.

## REFERENCES

1. Therrell BL, Padilla CD, Loeber JG, Kneisser I, Saadallah A, Borrajo GJ, et al. Current status of newborn screening worldwide: 2015. *Semin Perinatol.* 2015;39(3):171-87.
2. Wilson JMG, Jungner G, World Health O. Principles and practice of screening for disease. Geneva: World Health Organization; 1968.
3. Stark Z, Scott RH. Genomic newborn screening for rare diseases. *Nat Rev Genet.* 2023.
4. Koracin V, Mlinaric M, Baric I, Brincat I, Djordjevic M, Drole Torkar A, et al. Current Status of Newborn Screening in Southeastern Europe. *Frontiers in Pediatrics.* 2021;9.
5. Sikonja J, Groselj U, Scarpa M, la Marca G, Cheillan D, Kölker S, et al. Towards Achieving Equity and Innovation in Newborn Screening across Europe. *International Journal of Neonatal Screening.* 2022;8(2):31.
6. Department of Health and Aged Care. What is screened in the program 2023 [Available from: <https://www.health.gov.au/our-work/newborn-bloodspot-screening/what-is-screened>].
7. Tambuyzer E, Vandendriessche B, Austin CP, Brooks PJ, Larsson K, Miller Needleman KI, et al. Therapies for rare diseases: therapeutic modalities, progress and challenges ahead. *Nat Rev Drug Discov.* 2020;19(2):93-111.
8. Bick D, Bick SL, Dimmock DP, Fowler TA, Caulfield MJ, Scott RH. An online compendium of treatable genetic disorders. *Am J Med Genet C Semin Med Genet.* 2021;187(1):48-54.
9. Berg JS, Agrawal PB, Bailey DB, Jr., Beggs AH, Brenner SE, Brower AM, et al. Newborn Sequencing in Genomic Medicine and Public Health. *Pediatrics.* 2017;139(2).
10. Roman TS, Crowley SB, Roche MI, Foreman AKM, O'Daniel JM, Seifert BA, et al. Genomic Sequencing for Newborn Screening: Results of the NC NEXUS Project. *Am J Hum Genet.* 2020;107(4):596-611.
11. Adhikari AN, Gallagher RC, Wang Y, Currier RJ, Amatuni G, Bassaganyas L, et al. The role of exome sequencing in newborn screening for inborn errors of metabolism. *Nat Med.* 2020;26(9):1392-7.
12. Ceyhan-Birsoy O, Machini K, Lebo MS, Yu TW, Agrawal PB, Parad RB, et al. A curated gene list for reporting results of newborn genomic sequencing. *Genet Med.* 2017;19(7):809-18.
13. Pereira S, Robinson JO, Gutierrez AM, Petersen DK, Hsu RL, Lee CH, et al. Perceived Benefits, Risks, and Utility of Newborn Genomic Sequencing in the BabySeq Project. *Pediatrics.* 2019;143(Suppl 1):S6-s13.
14. Downie L, Halliday J, Lewis S, Amor DJ. Principles of Genomic Newborn Screening Programs: A Systematic Review. *JAMA Netw Open.* 2021;4(7):e2114336.
15. Cao M, Notini L, Ayres S, Vears DF. Australian healthcare professionals' perspectives on the ethical and practical issues associated with genomic newborn screening. *J Genet Couns.* 2023;32(2):376-86.
16. Iskrov G, Angelova V, Bochev B, Valchinova V, Gencheva T, Dzhuleva D, et al. Prospects for Expansion of Universal Newborn Screening in Bulgaria: A Survey among Medical Professionals. *International Journal of Neonatal Screening.* 2023;9(4):57.
17. Goldenberg AJ, Dodson DS, Davis MM, Tarini BA. Parents' interest in whole-genome sequencing of newborns. *Genet Med.* 2014;16(1):78-84.

18. Waisbren SE, Bäck DK, Liu C, Kalia SS, Ringer SA, Holm IA, et al. Parents are interested in newborn genomic testing during the early postpartum period. *Genet Med*. 2015;17(6):501-4.
19. Ceyhan-Birsoy O, Murry JB, Machini K, Lebo MS, Yu TW, Fayer S, et al. Interpretation of Genomic Sequencing Results in Healthy and Ill Newborns: Results from the BabySeq Project. *Am J Hum Genet*. 2019;104(1):76-93.
20. Timmins GT, Wynn J, Saami AM, Espinal A, Chung WK. Diverse Parental Perspectives of the Social and Educational Needs for Expanding Newborn Screening through Genomic Sequencing. *Public Health Genomics*. 2022:1-8.
21. Kingsmore SF, Smith LD, Kunard CM, Bainbridge M, Batalov S, Benson W, et al. A genome sequencing system for universal newborn screening, diagnosis, and precision medicine for severe genetic diseases. *Am J Hum Genet*. 2022;109(9):1605-19.
22. Spiekerkoetter U, Bick D, Scott R, Hopkins H, Krones T, Gross ES, et al. Genomic newborn screening: Are we entering a new era of screening? *J Inherit Metab Dis*. 2023;46(5):778-95.
23. Downie L, Halliday JL, Burt RA, Lunke S, Lynch E, Martyn M, et al. A protocol for whole-exome sequencing in newborns with congenital deafness: a prospective population-based cohort. *BMJ Paediatr Open*. 2017;1(1):e000119.
24. Presseau J, McCleary N, Lorencatto F, Patey AM, Grimshaw JM, Francis JJ. Action, actor, context, target, time (AACTT): a framework for specifying behaviour. *Implementation Science*. 2019;14(1):102.
25. Harris PA, Taylor R, Minor BL, Elliott V, Fernandez M, O'Neal L, et al. The REDCap consortium: Building an international community of software platform partners. *Journal of Biomedical Informatics*. 2019;95:103208.
26. Harris PA, Taylor R, Thielke R, Payne J, Gonzalez N, Conde JG. Research electronic data capture (REDCap)—A metadata-driven methodology and workflow process for providing translational research informatics support. *Journal of Biomedical Informatics*. 2009;42(2):377-81.
27. Bombard Y, Clausen M, Shickh S, Mighton C, Casalino S, Kim THM, et al. Effectiveness of the Genomics ADvISER decision aid for the selection of secondary findings from genomic sequencing: a randomized clinical trial. *Genetics in Medicine*. 2020;22(4):727-35.
28. Shickh S, Rafferty SA, Clausen M, Kodida R, Mighton C, Panchal S, et al. The role of digital tools in the delivery of genomic medicine: enhancing patient-centered care. *Genetics in Medicine*. 2021;23(6):1086-94.
29. Bombard Y, Clausen M, Mighton C, Carlsson L, Casalino S, Glogowski E, et al. The Genomics ADvISER: development and usability testing of a decision aid for the selection of incidental sequencing results. *European Journal of Human Genetics*. 2018;26(7):984-95.
30. Shickh S, Hirjikaka D, Clausen M, Kodida R, Mighton C, Reble E, et al. Genetics Adviser: a protocol for a mixed-methods randomised controlled trial evaluating a digital platform for genetics service delivery. *BMJ Open*. 2022;12(4):e060899.
31. Tariman JD, Berry DL, Halpenny B, Wolpin S, Schepp K. Validation and testing of the Acceptability E-scale for web-based patient-reported outcomes in cancer care. *Appl Nurs Res*. 2011;24(1):53-8.
32. Marteau TM, Bekker H. The development of a six-item short-form of the state scale of the Spielberger State-Trait Anxiety Inventory (STAI). *Br J Clin Psychol*. 1992;31(3):301-6.

- 1  
2  
3 33. Brehaut JC, O'Connor AM, Wood TJ, Hack TF, Siminoff L, Gordon E, et al. Validation  
4 of a decision regret scale. *Medical decision making : an international journal of the Society*  
5 *for Medical Decision Making*. 2003;23(4):281-92.  
6  
7 34. Grant P, Pampaka M, Payne K, Clarke A, McAllister M. Developing a short-form of the  
8 *Genetic Counselling Outcome Scale: The Genomics Outcome Scale*. *European journal of*  
9 *medical genetics*. 2018.  
10  
11 35. Vears DF, Gillam L. Inductive content analysis: A guide for beginning qualitative  
12 researchers. *Focus on Health Professional Education*. 2022;23(1):111-27.  
13  
14 36. Briggs A, Sculpher M, Claxton K. *Decision modelling for health economic evaluation*.  
15 *Oxford: Oxford University Press; 2006*.  
16  
17 37. Hauber AB, González JM, Groothuis-Oudshoorn CG, Prior T, Marshall DA,  
18 *Cunningham C, et al. Statistical Methods for the Analysis of Discrete Choice Experiments: A*  
19 *Report of the ISPOR Conjoint Analysis Good Research Practices Task Force*. *Value Health*.  
20 2016;19(4):300-15.  
21  
22 38. Reed Johnson F, Lancsar E, Marshall D, Kilambi V, Mühlbacher A, Regier DA, et al.  
23 *Constructing experimental designs for discrete-choice experiments: report of the ISPOR*  
24 *Conjoint Analysis Experimental Design Good Research Practices Task Force*. *Value Health*.  
25 2013;16(1):3-13.  
26  
27  
28  
29  
30  
31  
32  
33  
34  
35  
36  
37  
38  
39  
40  
41  
42  
43  
44  
45  
46  
47  
48  
49  
50  
51  
52  
53  
54  
55  
56  
57  
58  
59  
60



1  
2  
3 Figure 1: The three phases of the BabyScreen+ study including data collection tools and  
4  
5 research focus areas. \*refer to Table 1 for survey and interview measures.  
6  
7  
8  
9

10 Figure 2: Participation process for birth parents. Solid lines represent the expected end-to-  
11  
12 end study pathway (offer to result and final surveys), dashed lines represent anticipated  
13  
14 study exit pathways. \*Participants not able to complete enrolment in English will be  
15  
16 supported by a genetic counsellor and an interpreter. HCP, healthcare professional; NBS,  
17  
18 newborn bloodspot screening; T1-T4, survey timepoints/identifiers.  
19  
20  
21  
22  
23  
24  
25  
26  
27  
28  
29  
30  
31  
32  
33  
34  
35  
36  
37  
38  
39  
40  
41  
42  
43  
44  
45  
46  
47  
48  
49  
50  
51  
52  
53  
54  
55  
56  
57  
58  
59  
60

Pre-implementation

Implementation

Post-implementation

Study process

Data collection tools

Focus areas

Study design

Eligibility & recruitment

Enrolment & consent

Testing

Results

Evaluation

Key informant interviews

Focus groups

Process mapping

Discrete choice experiments

Laboratory data

Parental surveys and interviews\*

Interviews

Process mapping

Downstream healthcare use

Acceptability - public and professional views

Feasibility

Acceptability - family experience and attitudes

Diagnostic performance & clinical utility

Implementation experience

Ethical issues

Health economic analysis

Lifetime use of genomic data

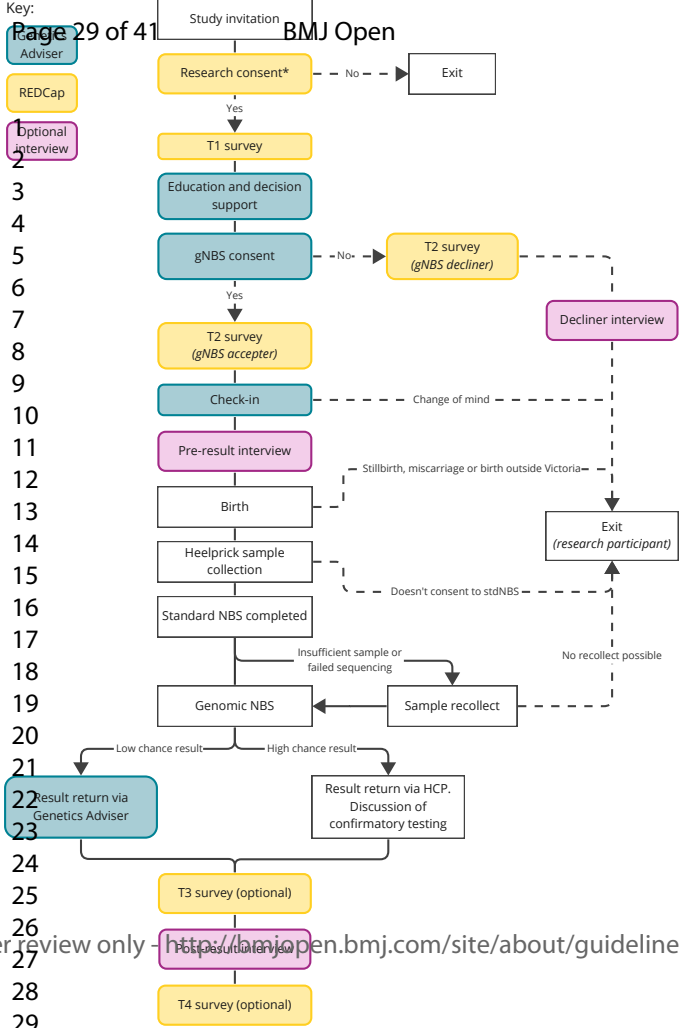

Supplementary Table 1: BabyScreen+ gene panel

| Gene Name | Model_Of_Inheritance                   | Phenotypes                                                                                                    |
|-----------|----------------------------------------|---------------------------------------------------------------------------------------------------------------|
| AAAS      | BIALLELIC                              | Achalasia-addisonianism-alacrimia syndrome, MIM#231550                                                        |
| ABCC6     | BIALLELIC                              | Arterial calcification, generalized, of infancy, 2, #MIM614473                                                |
| ABCC8     | BOTH monoallelic and biallelic         | Hyperinsulinemic hypoglycemia, familial, MIM#256450                                                           |
| ABCD1     | X-LINKED: hemizygous mutation in males | Adrenoleukodystrophy, MIM# 300100                                                                             |
| ABCD4     | BIALLELIC                              | Methylmalonic aciduria and homocystinuria, cblJ type MIM#614857                                               |
| ABCG5     | BIALLELIC                              | Sitosterolaemia 2, MIM# 618666                                                                                |
| ACAD9     | BIALLELIC                              | Mitochondrial complex I deficiency, nuclear type 20, MIM#611126                                               |
| ACADM     | BIALLELIC                              | Medium chain acyl CoA dehydrogenase deficiency, MIM#201450                                                    |
| ACADVL    | BIALLELIC                              | VLCAD deficiency, MIM#201475                                                                                  |
| ACAT1     | BIALLELIC                              | Alpha-methylacetoacetic aciduria, MIM#203750                                                                  |
| ACTA2     | BOTH monoallelic and biallelic         | Aortic aneurysm, familial thoracic 6, MIM# 611788                                                             |
| ACVRL1    | MONOALLELIC                            | Telangiectasia, hereditary hemorrhagic, type 2, MIM#600376                                                    |
| ADA       | BIALLELIC                              | Severe combined immunodeficiency due to ADA deficiency, MIM# 102700, MONDO:0007064                            |
| ADA2      | BIALLELIC                              | Vasculitis, autoinflammation, immunodeficiency, and haematologic defects syndrome, MIM# 615688                |
| ADAMTS13  | BIALLELIC                              | Thrombotic thrombocytopenic purpura, familial, MIM#274150                                                     |
| ADGRV1    | BIALLELIC                              | Usher syndrome, type 2C, MIM# 605472                                                                          |
| AGL       | BIALLELIC                              | Glycogen storage disease IIIa, MIM#232400                                                                     |
| AGRN      | BIALLELIC                              | Myasthenic syndrome, congenital, 8, with pre- and postsynaptic defects, MIM# 615120                           |
| AGXT      | BIALLELIC                              | Hyperoxaluria, primary, type 1, MIM# 259900, MONDO:0009823                                                    |
| AHCY      | BIALLELIC                              | Hypermethioninemia with deficiency of S-adenosylhomocysteine hydrolase, MIM#613752                            |
| AICDA     | BIALLELIC                              | Immunodeficiency with hyper-IgM, type 2, MIM#605258                                                           |
| AIRE      | BIALLELIC                              | Autoimmune polyendocrinopathy syndrome , type I, with or without reversible metaphyseal dysplasia, MIM#240300 |
| AK2       | BIALLELIC                              | Reticular dysgenesis, MIM# 267500;MONDO:0009973                                                               |
| AKR1D1    | BIALLELIC                              | Bile acid synthesis defect, congenital, 2                                                                     |
| ALDH4A1   | BIALLELIC                              | Hyperprolinemia, type II MIM#239510                                                                           |
| ALDH7A1   | BIALLELIC                              | Epilepsy, pyridoxine-dependent, MIM#266100                                                                    |
| ALDOB     | BIALLELIC                              | Fructose intolerance, hereditary, MIM# 229600                                                                 |
| ALPL      | BIALLELIC                              | Hypophosphatasia, childhood OMIM#241510;Hypophosphatasia, infantile OMIM#241500                               |
| AMACR     | BIALLELIC                              | Bile acid synthesis defect, congenital, 4, MIM# 214950                                                        |
| AMN       | BIALLELIC                              | Megaloblastic anemia-1, Norwegian type, MIM#618882                                                            |
| AP3B1     | BIALLELIC                              | Hermansky-Pudlak syndrome 2, MIM# 608233 MONDO:0011997                                                        |
| AQP2      | BOTH monoallelic and biallelic         | Diabetes insipidus, nephrogenic, 2, MIM#125800                                                                |
| ARG1      | BIALLELIC                              | Arginase deficiency, MIM#207800                                                                               |
| ARPC1B    | BIALLELIC                              | Immunodeficiency 71 with inflammatory disease and congenital thrombocytopenia, MIM#617718                     |
| ARSA      | BIALLELIC                              | Metachromatic leukodystrophy, MIM# 250100                                                                     |
| ARSB      | BIALLELIC                              | Mucopolysaccharidosis VI (MPS6, MIM# 253200                                                                   |
| ASL       | BIALLELIC                              | Argininosuccinic aciduria, MIM#207900                                                                         |
| ASS1      | BIALLELIC                              | Citrullinaemia, MIM#215700                                                                                    |
| ATP6V0A4  | BIALLELIC                              | Distal renal tubular acidosis 3, with or without sensorineural hearing loss, MIM3602722                       |
| ATP6V1B1  | BIALLELIC                              | Distal renal tubular acidosis 2 with progressive sensorineural hearing loss, MIM# 267300                      |
| ATP7A     | X-LINKED: hemizygous mutation in males | Menkes disease, MIM# 309400                                                                                   |
| ATP7B     | BIALLELIC                              | Wilson disease MIM#277900                                                                                     |
| AVP       | MONOALLELIC                            | Diabetes insipidus, neurohypophyseal MIM#125700                                                               |
| AVPR2     | X-LINKED: hemizygous mutation in males | Diabetes insipidus, nephrogenic, MIM#304800                                                                   |
| BCHE      | BIALLELIC                              | Butyrylcholinesterase deficiency, MIM#617936                                                                  |
| BCKDHA    | BIALLELIC                              | Maple syrup urine disease, type Ia, MIM# 248600                                                               |
| BCKDHB    | BIALLELIC                              | Maple syrup urine disease, type Ib, MIM# 248600                                                               |
| BCKDK     | BIALLELIC                              | Branched-chain keto acid dehydrogenase kinase deficiency, MIM#614923                                          |
| BLNK      | BIALLELIC                              | Agammaglobulinaemia 4, MIM#613502                                                                             |

|    |          |                                        |                                                                                                                                       |
|----|----------|----------------------------------------|---------------------------------------------------------------------------------------------------------------------------------------|
| 1  |          |                                        |                                                                                                                                       |
| 2  |          |                                        |                                                                                                                                       |
| 3  | BMP1     | BIALLELIC                              | Osteogenesis imperfecta, type XIII , MIM#614856                                                                                       |
| 4  | BRCA1    | BIALLELIC                              | Fanconi anemia, complementation group S, MIM# 617883                                                                                  |
| 5  | BRCA2    | BIALLELIC                              | Fanconi anaemia, complementation group D1, MIM# 605724                                                                                |
| 6  | BRIP1    | BIALLELIC                              | Fanconi anaemia, complementation group J, MIM#609054                                                                                  |
| 7  | BSCL2    | BIALLELIC                              | Lipodystrophy, congenital generalized, type 2, MIM# 269700;Berardinelli-Seip lipodystrophy                                            |
| 8  |          |                                        |                                                                                                                                       |
| 9  | BSND     | BIALLELIC                              | Bartter syndrome, type 4a, MIM# 602522                                                                                                |
| 10 | BTD      | BIALLELIC                              | Biotinidase deficiency, MIM#253260                                                                                                    |
| 11 | BTK      | X-LINKED: hemizygous mutation in males | Agammaglobulinemia, X-linked 1, MIM#300755                                                                                            |
| 12 | C17orf62 | BIALLELIC                              | Chronic granulomatous disease 5, autosomal recessive, MIM# 618935                                                                     |
| 13 | C2       | BIALLELIC                              | C2 deficiency, MIM#217000                                                                                                             |
| 14 | C3       | BIALLELIC                              | C3 deficiency, MIM#613779                                                                                                             |
| 15 | C5       | BIALLELIC                              | C5 deficiency, MIM#609536                                                                                                             |
| 16 | C6       | BIALLELIC                              | C6 deficiency, MIM#612446                                                                                                             |
| 17 | C7       | BIALLELIC                              | C7 deficiency, MIM#610102                                                                                                             |
| 18 | C8B      | BIALLELIC                              | C8 deficiency, type II, MIM#613789                                                                                                    |
| 19 | C9       | BIALLELIC                              | C9 deficiency, MIM#613825                                                                                                             |
| 20 | CA12     | BIALLELIC                              | Hyperchlorhidrosis, isolated MIM#143860                                                                                               |
| 21 | CA2      | BIALLELIC                              | Osteopetrosis, autosomal recessive 3, with renal tubular acidosis, MIM#259730                                                         |
| 22 | CA5A     | BIALLELIC                              | Hyperammonaemia due to carbonic anhydrase VA deficiency, MIM#615751                                                                   |
| 23 | CABP2    | BIALLELIC                              | Deafness, autosomal recessive 93, MIM# 614899                                                                                         |
| 24 | CACNA1S  | MONOALLELIC                            | Malignant hyperthermia susceptibility 5, MIM# 601887                                                                                  |
| 25 | CAD      | BIALLELIC                              | Developmental and epileptic encephalopathy 50, MIM#616457                                                                             |
| 26 | CALM3    | MONOALLELIC                            | Long QT syndrome 16, MIM#618782                                                                                                       |
| 27 |          |                                        |                                                                                                                                       |
| 28 | CARD11   | BOTH monoallelic and biallelic         | Immunodeficiency 11A, autosomal recessive, MIM# 615206;Immunodeficiency 11B with atopic dermatitis, autosomal dominant, MIM# 617638   |
| 29 |          |                                        |                                                                                                                                       |
| 30 | CASR     | BOTH monoallelic and biallelic         | Hypocalcemia, autosomal dominant MIM#601198;Hyperparathyroidism, neonatal MIM#239200                                                  |
| 31 | CAV1     | BIALLELIC                              | Lipodystrophy, congenital generalized, type 3, MIM#612526                                                                             |
| 32 | CAVIN1   | BIALLELIC                              | Lipodystrophy, congenital generalized, type 4, MIM# 613327                                                                            |
| 33 | CD19     | BIALLELIC                              | Immunodeficiency, common variable, 3, MIM#613493                                                                                      |
| 34 | CD247    | BIALLELIC                              | Immunodeficiency 25, MIM# 610163                                                                                                      |
| 35 | CD27     | BIALLELIC                              | CD27-deficiency MIM# 615122                                                                                                           |
| 36 | CD3D     | BIALLELIC                              | Immunodeficiency 19, MIM#615617                                                                                                       |
| 37 | CD3E     | BIALLELIC                              | Immunodeficiency 18, MIM#615615                                                                                                       |
| 38 | CD3G     | BIALLELIC                              | Immunodeficiency 17;CD3 gamma deficient MIM# 615607                                                                                   |
| 39 | CD40     | BIALLELIC                              | Immunodeficiency with hyper-IgM, type 3, MIM#606843                                                                                   |
| 40 | CD40LG   | X-LINKED: hemizygous mutation in males | Immunodeficiency, X-linked, with hyper-IgM MIM# 308230                                                                                |
| 41 | CD55     | BIALLELIC                              | Complement hyperactivation, angiopathic thrombosis, and protein-losing enteropathy, MIM# 226300                                       |
| 42 |          |                                        |                                                                                                                                       |
| 43 | CD70     | BIALLELIC                              | Lymphoproliferative syndrome 3, MIM# 618261                                                                                           |
| 44 | CD79A    | BIALLELIC                              | Agammaglobulinaemia 3, MIM#613501                                                                                                     |
| 45 | CD79B    | BIALLELIC                              | Agammaglobulinaemia 6, MIM#612692                                                                                                     |
| 46 | CDC14A   | BIALLELIC                              | Deafness, autosomal recessive 32, with or without immotile sperm, MIM# 608653                                                         |
| 47 |          |                                        |                                                                                                                                       |
| 48 | CDCA7    | BIALLELIC                              | Immunodeficiency-centromeric instability-facial anomalies syndrome 3, MIM# 616910                                                     |
| 49 | CDCA8    | BOTH monoallelic and biallelic         | Congenital hypothyroidism, MONDO:0018612, CDCA8-related                                                                               |
| 50 |          |                                        |                                                                                                                                       |
| 51 | CDH23    | BIALLELIC                              | Usher syndrome, type 1D (MIM# 601067);Deafness, autosomal recessive 12 (MIM # 601386);Usher syndrome, type 1D/F digenic (MIM #601067) |
| 52 | CDKN1C   | MONOALLELIC, imprinted                 | IMAGe syndrome, MIM# 614732                                                                                                           |
| 53 | CEBPE    | BIALLELIC                              | Specific granule deficiency, MIM# 245480                                                                                              |
| 54 | CFD      | BIALLELIC                              | Complement factor D deficiency, MIM#613912                                                                                            |
| 55 | CFH      | BIALLELIC                              | Complement factor H deficiency, MIM# 609814                                                                                           |
| 56 | CFI      | BIALLELIC                              | Complement factor I deficiency MIM#610984                                                                                             |
| 57 | CFP      | X-LINKED: hemizygous mutation in males | Properdin deficiency, X-linked, MIM#312060                                                                                            |
| 58 | CFTR     | BIALLELIC                              | Cystic fibrosis, MIM#219700                                                                                                           |
| 59 | CHAT     | BIALLELIC                              | Congenital myasthenic syndrome, MIM#254210                                                                                            |
| 60 |          |                                        |                                                                                                                                       |

1  
2  
3  
4  
5  
6  
7  
8  
9  
10  
11  
12  
13  
14  
15  
16  
17  
18  
19  
20  
21  
22  
23  
24  
25  
26  
27  
28  
29  
30  
31  
32  
33  
34  
35  
36  
37  
38  
39  
40  
41  
42  
43  
44  
45  
46  
47  
48  
49  
50  
51  
52  
53  
54  
55  
56  
57  
58  
59  
60

|         |                                        |                                                                                                                                                                                                                                                                                                    |
|---------|----------------------------------------|----------------------------------------------------------------------------------------------------------------------------------------------------------------------------------------------------------------------------------------------------------------------------------------------------|
| CHRNA1  | BIALLELIC                              | Myasthenic syndrome, congenital, 1A, slow-channel, MIM# 601462;Myasthenic syndrome, congenital, 1B, fast-channel , MIM#608930                                                                                                                                                                      |
| CHRNB1  | BIALLELIC                              | Myasthenic syndrome, congenital, 2C, associated with acetylcholine receptor deficiency, MIM# 616314;Congenital myasthenic syndrome                                                                                                                                                                 |
| CHRND   | BIALLELIC                              | Myasthenic syndrome, congenital, 3B, fast-channel, MIM#616322;Myasthenic syndrome, congenital, 3C, associated with acetylcholine receptor deficiency, MIM#616323;Myasthenic syndrome, congenital, 3A, slow-channel, MIM#616321;Multiple pterygium syndrome, lethal type, MIM# 253290;MONDO:0009668 |
| CHRNE   | BIALLELIC                              | Myasthenic syndrome, congenital, 4B, fast-channel, 616324;Myasthenic syndrome, congenital, 4C, associated with acetylcholine receptor deficiency, 608931;Myasthenic syndrome, slow-channel congenital, 601462;Myasthenic syndrome, congenital, 4A, slow-channel, 605809                            |
| CIB2    | BIALLELIC                              | Deafness, autosomal recessive 48, MIM# 609439                                                                                                                                                                                                                                                      |
| CIITA   | BIALLELIC                              | Bare Lymphocyte Syndrome, type II, complementation group A MIM# 209920                                                                                                                                                                                                                             |
| CLCN7   | BIALLELIC                              | Osteopetrosis, autosomal recessive 4, MIM# 611490                                                                                                                                                                                                                                                  |
| CLDN14  | BIALLELIC                              | Deafness, autosomal recessive 29, MIM# 614035                                                                                                                                                                                                                                                      |
| CLPP    | BIALLELIC                              | Perrault syndrome 3, MIM# 614129                                                                                                                                                                                                                                                                   |
| COCH    | BIALLELIC                              | Deafness, autosomal recessive 110, MIM# 618094                                                                                                                                                                                                                                                     |
| COL11A1 | MONOALLELIC                            | Stickler syndrome, type II, MIM# 604841                                                                                                                                                                                                                                                            |
| COL11A2 | BIALLELIC                              | Deafness, autosomal recessive 53, MIM# 609706                                                                                                                                                                                                                                                      |
| COL13A1 | BIALLELIC                              | Myasthenic syndrome, congenital, 19, MIM#616720                                                                                                                                                                                                                                                    |
| COL1A1  | MONOALLELIC                            | Osteogenesis imperfecta, type I, MIM#166200                                                                                                                                                                                                                                                        |
| COL1A2  | MONOALLELIC                            | Osteogenesis imperfecta, type II , MIM#166210                                                                                                                                                                                                                                                      |
| COL2A1  | MONOALLELIC                            | Stickler syndrome, type I, MIM# 108300                                                                                                                                                                                                                                                             |
| COL4A3  | BIALLELIC                              | Alport syndrome 2, autosomal recessive, MIM# 203780                                                                                                                                                                                                                                                |
| COL4A4  | BIALLELIC                              | Alport syndrome 2, autosomal recessive MIM#203780                                                                                                                                                                                                                                                  |
| COL4A5  | X-LINKED: hemizygous mutation in males | Alport syndrome 1, X-linked, MIM# 301050                                                                                                                                                                                                                                                           |
| COL9A1  | BIALLELIC                              | Stickler syndrome, type IV, MIM#614134                                                                                                                                                                                                                                                             |
| COL9A2  | BIALLELIC                              | Stickler syndrome, type V, MIM# 614284                                                                                                                                                                                                                                                             |
| COL9A3  | BIALLELIC                              | Stickler syndrome, type VI, MIM# 620022                                                                                                                                                                                                                                                            |
| COLQ    | BIALLELIC                              | Congenital myasthenic syndrome, MIM#603034                                                                                                                                                                                                                                                         |
| COQ2    | BIALLELIC                              | Coenzyme Q10 deficiency, primary, 1, MIM#607426                                                                                                                                                                                                                                                    |
| COQ4    | BIALLELIC                              | Coenzyme Q10 deficiency, primary, 7, MIM#616276                                                                                                                                                                                                                                                    |
| COQ6    | BIALLELIC                              | Coenzyme Q10 deficiency, primary, 6, MIM#614650                                                                                                                                                                                                                                                    |
| COQ8A   | BIALLELIC                              | Coenzyme Q10 deficiency, primary, 4, MIM#612016                                                                                                                                                                                                                                                    |
| CORO1A  | BIALLELIC                              | Immunodeficiency 8 MIM# 615401                                                                                                                                                                                                                                                                     |
| CPS1    | BIALLELIC                              | Carbamoylphosphate synthetase I deficiency, MIM#237300                                                                                                                                                                                                                                             |
| CPT1A   | BIALLELIC                              | Carnitine palmitoyltransferase I deficiency, MIM#255120                                                                                                                                                                                                                                            |
| CPT2    | BIALLELIC                              | CPT II deficiency, infantile 600649;CPT II deficiency, lethal neonatal 608836;CPT II deficiency, myopathic, stress-induced 255110                                                                                                                                                                  |
| CRTAP   | BIALLELIC                              | Osteogenesis imperfecta, type VII, MIM# MIM#610682                                                                                                                                                                                                                                                 |
| CSF3R   | BIALLELIC                              | Neutropenia, severe congenital, 7, autosomal recessive, MIM#617014                                                                                                                                                                                                                                 |
| CTNS    | BIALLELIC                              | Cystinosis, nephropathic MIM#219800                                                                                                                                                                                                                                                                |
| CTPS1   | BIALLELIC                              | Immunodeficiency 24, MIM#615897                                                                                                                                                                                                                                                                    |
| CUBN    | BIALLELIC                              | Megaloblastic anaemia-1, Finnish type, MIM#261100                                                                                                                                                                                                                                                  |
| CUL3    | MONOALLELIC                            | Pseudohypoadosteronism, type IIE 614496                                                                                                                                                                                                                                                            |
| CXCR4   | MONOALLELIC                            | WHIM syndrome 1, MIM#193670                                                                                                                                                                                                                                                                        |
| CYB561  | BIALLELIC                              | Orthostatic hypotension 2, MIM#618182                                                                                                                                                                                                                                                              |
| CYBA    | BIALLELIC                              | Chronic granulomatous disease, MIM#233690                                                                                                                                                                                                                                                          |
| CYBB    | X-LINKED: hemizygous mutation in males | Chronic granulomatous disease, MIM#306400                                                                                                                                                                                                                                                          |
| CYP11A1 | BIALLELIC                              | Adrenal insufficiency, congenital, with 46XY sex reversal, partial or complete, MIM#613743                                                                                                                                                                                                         |
| CYP11B1 | BIALLELIC                              | Adrenal hyperplasia, congenital, due to 11-beta-hydroxylase deficiency, MIM#202010                                                                                                                                                                                                                 |
| CYP11B2 | BIALLELIC                              | Hypoadosteronism, congenital, due to CMO I deficiency, MIM#203400;Hypoadosteronism, congenital, due to CMO II deficiency, MIM#610600                                                                                                                                                               |
| CYP17A1 | BIALLELIC                              | 17,20-lyase deficiency, isolated, MIM#202110                                                                                                                                                                                                                                                       |
| CYP21A2 | BIALLELIC                              | Adrenal hyperplasia, congenital, due to 21-hydroxylase deficiency, MIM#201910                                                                                                                                                                                                                      |

|    |         |                                        |                                                                                                                                                               |
|----|---------|----------------------------------------|---------------------------------------------------------------------------------------------------------------------------------------------------------------|
| 1  |         |                                        |                                                                                                                                                               |
| 2  |         |                                        |                                                                                                                                                               |
| 3  | CYP27A1 | BIALLELIC                              | Cerebrotendinous xanthomatosis, MIM# 213700                                                                                                                   |
| 4  | CYP27B1 | BIALLELIC                              | Vitamin D-dependent rickets, type I MIM#264700                                                                                                                |
| 5  | CYP2R1  | BIALLELIC                              | Rickets due to defect in vitamin D 25-hydroxylation deficiency MIM#600081                                                                                     |
| 6  | CYP7B1  | BIALLELIC                              | Bile acid synthesis defect, congenital, 3, MIM# 613812                                                                                                        |
| 7  | DBT     | BIALLELIC                              | Maple syrup urine disease, MIM#248600                                                                                                                         |
| 8  | DCLRE1C | BIALLELIC                              | Severe combined immunodeficiency, Athabaskan type MIM# 602450;Omenn syndrome, MIM# 603554                                                                     |
| 9  |         |                                        |                                                                                                                                                               |
| 10 | DDC     | BIALLELIC                              | Aromatic L-amino acid decarboxylase deficiency, MIM#608643                                                                                                    |
| 11 | DFNB59  | BIALLELIC                              | Deafness, autosomal recessive 59, MIM# 610220                                                                                                                 |
| 12 | DGAT1   | BIALLELIC                              | Diarrhea 7, protein-losing enteropathy type , MIM#615863                                                                                                      |
| 13 | DHCR7   | BIALLELIC                              | Smith-Lemli-Opitz syndrome, MIM#270400                                                                                                                        |
| 14 | DHFR    | BIALLELIC                              | Megaloblastic anaemia due to dihydrofolate reductase deficiency, MIM# 613839                                                                                  |
| 15 | DICER1  | MONOALLELIC                            | DICER1 syndrome, MONDO:0017288                                                                                                                                |
| 16 | DLAT    | BIALLELIC                              | Pyruvate dehydrogenase E2 deficiency, MIM#245348                                                                                                              |
| 17 | DMP1    | BIALLELIC                              | Hypophosphatemic rickets MIM#241520                                                                                                                           |
| 18 | DNAJC12 | BIALLELIC                              | Hyperphenylalaninemia, mild, non-BH4-deficient, MIM#617384                                                                                                    |
| 19 | DNAJC21 | BIALLELIC                              | Bone marrow failure syndrome 3, MIM#617052                                                                                                                    |
| 20 | DNASE2  | BIALLELIC                              | Autoinflammatory-pancytopenia syndrome, MIM# 619858                                                                                                           |
| 21 |         |                                        |                                                                                                                                                               |
| 22 | DNMT3B  | BIALLELIC                              | Immunodeficiency-centromeric instability-facial anomalies syndrome 1, MIM# 242860                                                                             |
| 23 | DOCK2   | BIALLELIC                              | Immunodeficiency 40 MIM# 616433                                                                                                                               |
| 24 | DOCK8   | BIALLELIC                              | Hyper-IgE syndrome, MIM#243700                                                                                                                                |
| 25 | DOK7    | BIALLELIC                              | Congenital myasthenic syndrome, MIM# 254300                                                                                                                   |
| 26 |         |                                        |                                                                                                                                                               |
| 27 | DPAGT1  | BIALLELIC                              | Congenital disorder of glycosylation, type Ij, MIM# 608093;DPAGT1-CDG MONDO:0011964;Myasthenic syndrome, congenital, 13, with tubular aggregates, MIM# 614750 |
| 28 |         |                                        |                                                                                                                                                               |
| 29 | DUOX2   | BIALLELIC                              | Thyroid dysmorphogenesis 6, MIM# 607200                                                                                                                       |
| 30 | DUOXA2  | BIALLELIC                              | Thyroid dysmorphogenesis 5, MIM# 274900                                                                                                                       |
| 31 | ECHS1   | BIALLELIC                              | Mitochondrial short-chain enoyl-CoA hydratase 1 deficiency MIM# 616277                                                                                        |
| 32 | EDN3    | BIALLELIC                              | Waardenburg syndrome, type 4B, MIM# 613265                                                                                                                    |
| 33 | EDNRB   | BOTH monoallelic and biallelic         | Waardenburg syndrome, type 4A, MIM# 277580                                                                                                                    |
| 34 | EFL1    | BIALLELIC                              | Shwachman-Diamond syndrome 2, MIM#617941                                                                                                                      |
| 35 | EIF2AK3 | BIALLELIC                              | Wolcott-Rallison syndrome, MIM#226980                                                                                                                         |
| 36 | ELANE   | MONOALLELIC                            | Neutropenia, congenital, MIM#202700                                                                                                                           |
| 37 | ENG     | MONOALLELIC                            | Telangiectasia, hereditary hemorrhagic, type 1 MIM#187300                                                                                                     |
| 38 | ENPP1   | BIALLELIC                              | Arterial calcification, generalized, of infancy, 1, MIM# 208000;Hypophosphatemic rickets, autosomal recessive, 2, MIM# 613312                                 |
| 39 |         |                                        |                                                                                                                                                               |
| 40 | EPS8    | BIALLELIC                              | Autosomal recessive nonsyndromic hearing loss 102, MIM#600205, MONDO:0014428                                                                                  |
| 41 | ERCC4   | BIALLELIC                              | Fanconi anemia, complementation group Q, MIM# 615272                                                                                                          |
| 42 | ESPN    | BIALLELIC                              | Deafness, autosomal recessive 36, MIM# 609006                                                                                                                 |
| 43 | ESRRB   | BIALLELIC                              | Deafness, autosomal recessive 35, MIM#608565                                                                                                                  |
| 44 | ETFA    | BIALLELIC                              | Glutaric acidemia IIA, MIM#231680                                                                                                                             |
| 45 | ETFB    | BIALLELIC                              | Glutaric acidemia IIB, MIM#231680                                                                                                                             |
| 46 | ETFDH   | BIALLELIC                              | Glutaric acidemia IIC, MIM#231680                                                                                                                             |
| 47 | ETHE1   | BIALLELIC                              | Ethylmalonic encephalopathy, MIM#602473                                                                                                                       |
| 48 | F10     | BIALLELIC                              | Factor X deficiency, MIM#227600                                                                                                                               |
| 49 | F13A1   | BIALLELIC                              | Factor XIII A deficiency, MIM#613225                                                                                                                          |
| 50 | F13B    | BIALLELIC                              | Factor XIII B deficiency, MIM#613235                                                                                                                          |
| 51 | F7      | BIALLELIC                              | Factor VII deficiency MIM# 227500                                                                                                                             |
| 52 | F9      | X-LINKED: hemizygous mutation in males | Haemophilia B, MIM#306900                                                                                                                                     |
| 53 | FAH     | BIALLELIC                              | Tyrosinaemia, type I, MIM#276700                                                                                                                              |
| 54 | FAM111A | MONOALLELIC                            | Kenny-Caffey syndrome, type 2, MIM# 127000                                                                                                                    |
| 55 | FANCA   | BIALLELIC                              | Fanconi anaemia, complementation group A, MIM# 227650;MONDO:0009215                                                                                           |
| 56 | FANCB   | X-LINKED: hemizygous mutation in males | Fanconi anaemia, complementation group B, MIM# 300514                                                                                                         |
| 57 | FANCC   | BIALLELIC                              | Fanconi anemia, complementation group C, MIM# 227645;MONDO:0009213                                                                                            |
| 58 | FANCD2  | BIALLELIC                              | Fanconi anaemia, complementation group D2, MIM# 227646;MONDO:0009214                                                                                          |
| 59 |         |                                        |                                                                                                                                                               |
| 60 | FANCG   | BIALLELIC                              | Fanconi anaemia, MIM#614082                                                                                                                                   |



|    |        |                                        |                                                                                                                                    |
|----|--------|----------------------------------------|------------------------------------------------------------------------------------------------------------------------------------|
| 1  |        |                                        |                                                                                                                                    |
| 2  |        |                                        |                                                                                                                                    |
| 3  | FANCI  | BIALLELIC                              | Fanconi anaemia, MIM#609053                                                                                                        |
| 4  | FBN1   | MONOALLELIC                            | Marfan syndrome, MIM# 154700                                                                                                       |
| 5  | FBP1   | BIALLELIC                              | Fructose-1,6-bisphosphatase deficiency MIM# 229700                                                                                 |
| 6  | FCHO1  | BIALLELIC                              | Immunodeficiency 76, MIM# 619164                                                                                                   |
| 7  | FECH   | BIALLELIC                              | Protoporphyrin, erythropoietic, 1, MIM#177000                                                                                      |
| 8  | FERMT3 | BIALLELIC                              | Leukocyte adhesion deficiency, type III, MIM#612840                                                                                |
| 9  | FGA    | BIALLELIC                              | Afibrinogenemia, congenital (MIM#202400)                                                                                           |
| 10 | FGB    | BIALLELIC                              | Afibrinogenemia, congenital, MIM# 202400                                                                                           |
| 11 |        |                                        | autosomal dominant hypophosphatemic rickets MONDO:0008660;familial                                                                 |
| 12 | FGF23  | BOTH monoallelic and biallelic         | hyperphosphatemic tumoral calcinosis/hyperphosphatemic hyperostosis syndrome MONDO:0100251                                         |
| 13 |        |                                        | Deafness, congenital with inner ear agenesis, microtia, and microdontia, MIM# 610706                                               |
| 14 | FGF3   | BIALLELIC                              |                                                                                                                                    |
| 15 | FGFR3  | MONOALLELIC                            | Achondroplasia MONDO:0007037                                                                                                       |
| 16 | FGG    | BIALLELIC                              | Afibrinogenemia, congenital, MIM# 202400                                                                                           |
| 17 | FH     | BIALLELIC                              | Fumurate deficiency MIM# 606812                                                                                                    |
| 18 | FKBP10 | BIALLELIC                              | Osteogenesis imperfecta, type XI, OMIM:610968                                                                                      |
| 19 |        |                                        | Lipid storage myopathy due to flavin adenine dinucleotide synthetase deficiency, MIM#255100                                        |
| 20 | FLAD1  | BIALLELIC                              |                                                                                                                                    |
| 21 |        |                                        | Neurodegeneration due to cerebral folate transport deficiency, MIM# 613068                                                         |
| 22 | FOLR1  | BIALLELIC                              |                                                                                                                                    |
| 23 | FOXA2  | MONOALLELIC                            | Hyperinsulinism MONDO:0002177                                                                                                      |
| 24 | FOXE1  | BIALLELIC                              | Bamforth-Lazarus syndrome MIM# 241850                                                                                              |
| 25 |        |                                        | T-cell immunodeficiency, congenital alopecia, and nail dystrophy, autosomal                                                        |
| 26 | FOXN1  | BOTH monoallelic and biallelic         | recessive MIM# 601705;T-cell lymphopenia, infantile, with or without nail dystrophy, autosomal dominant, MIM#t 618806              |
| 27 |        |                                        | IPEX syndrome, MIM#304790                                                                                                          |
| 28 | FOXP3  | X-LINKED: hemizygous mutation in males |                                                                                                                                    |
| 29 | FUCA1  | BIALLELIC                              | Fucosidosis, MIM# 230000                                                                                                           |
| 30 | G6PC   | BIALLELIC                              | Glycogen storage disease Ia, MIM#232200                                                                                            |
| 31 | G6PC3  | BIALLELIC                              | Neutropaenia, congenital, MIM#612541                                                                                               |
| 32 | G6PD   | X-LINKED: hemizygous mutation in males | Glucose-6-phosphate dehydrogenase deficiency, MIM#300908                                                                           |
| 33 | GAA    | BIALLELIC                              | Glycogen storage disease II, Pompe disease, MIM# 232300                                                                            |
| 34 | GALC   | BIALLELIC                              | Krabbe disease, MIM#245200                                                                                                         |
| 35 | GALE   | BIALLELIC                              | Galactose epimerase deficiency, MIM#230350                                                                                         |
| 36 | GALK1  | BIALLELIC                              | Galactokinase deficiency with cataracts, MIM#230200                                                                                |
| 37 | GALM   | BIALLELIC                              | Galactosemia IV MIM#618881                                                                                                         |
| 38 | GALNS  | BIALLELIC                              | Mucopolysaccharidosis IVA, MIM#253000                                                                                              |
| 39 | GALNT3 | BIALLELIC                              | Tumoral calcinosis, hyperphosphatemic, familial, 1, MIM# 211900                                                                    |
| 40 | GALT   | BIALLELIC                              | Galactosaemia, MIM#230400                                                                                                          |
| 41 | GAMT   | BIALLELIC                              | Cerebral creatine deficiency syndrome 2, MIM#612736                                                                                |
| 42 | GATA2  | MONOALLELIC                            | Immunodeficiency 21 MIM# 614172;Emberger syndrome MIM# 614038                                                                      |
| 43 | GATA3  | MONOALLELIC                            | Hypoparathyroidism, sensorineural deafness, and renal dysplasia, MIM# 146255                                                       |
| 44 | GATA4  | MONOALLELIC                            | Neonatal diabetes mellitus, MONDO:0016391, GATA4-related                                                                           |
| 45 | GATM   | BIALLELIC                              | Cerebral creatine deficiency syndrome 3 MIM#612718                                                                                 |
| 46 | GBA    | BIALLELIC                              | Gaucher disease type 1, MIM#230800                                                                                                 |
| 47 | GCDH   | BIALLELIC                              | Glutaric aciduria, type I, MIM#231670                                                                                              |
| 48 | GCH1   | BOTH monoallelic and biallelic         | Hyperphenylalaninemia, BH4-deficient, B, MIM# 233910;Dystonia, DOPA-responsive, with or without hyperphenylalaninemia, MIM# 128230 |
| 49 | GCK    | BOTH monoallelic and biallelic         | Hyperinsulinemic hypoglycemia, familial, MIM#602485                                                                                |
| 50 |        |                                        | Hyperparathyroidism 4, OMIM #617343;Hypoparathyroidism, familial isolated                                                          |
| 51 | GCM2   | BOTH monoallelic and biallelic         | 2, OMIM #618883                                                                                                                    |
| 52 | GFI1   | MONOALLELIC                            | Neutropenia, severe congenital 2, autosomal dominant, MIM# 613107                                                                  |
| 53 | GGCX   | BIALLELIC                              | Vitamin K-dependent clotting factors, combined deficiency of, 1 MIM# 277450                                                        |
| 54 |        |                                        | Growth hormone deficiency, isolated, type IA, MIM# 262400;Growth hormone                                                           |
| 55 | GH1    | BOTH monoallelic and biallelic         | deficiency, isolated, type II, MIM# 173100;Kowarski syndrome, MIM# 262650                                                          |
| 56 |        |                                        | Growth hormone insensitivity, partial, MIM# 604271;Laron dwarfism, MIM#                                                            |
| 57 | GHR    | BOTH monoallelic and biallelic         | 262500                                                                                                                             |
| 58 | GHRHR  | BIALLELIC                              | Growth hormone deficiency, isolated, type IV, MIM# 618157                                                                          |
| 59 | GIF    | BIALLELIC                              | Intrinsic factor deficiency, MIM#261000                                                                                            |
| 60 |        |                                        |                                                                                                                                    |



|    |         |                                        |                                                                                                        |
|----|---------|----------------------------------------|--------------------------------------------------------------------------------------------------------|
| 1  |         |                                        |                                                                                                        |
| 2  |         |                                        |                                                                                                        |
| 3  | GIPC3   | BIALLELIC                              | Deafness, autosomal recessive 15, MIM# 601869                                                          |
| 4  | GJB2    | BIALLELIC                              | Deafness, autosomal recessive 1A, MIM# 220290                                                          |
| 5  | GLA     | X-LINKED: hemizygous mutation in males | Fabry disease (MIM# 301500)                                                                            |
| 6  | GLIS3   | BIALLELIC                              | Diabetes mellitus, neonatal, with congenital hypothyroidism MIM#610199                                 |
| 7  | GLRA1   | BOTH monoallelic and biallelic         | Hyperekplexia, hereditary 1, autosomal dominant or recessive, MIM#149400                               |
| 8  | GLUD1   | MONOALLELIC                            | Hyperinsulinism, MIM#606762                                                                            |
| 9  | GNAS    | MONOALLELIC                            | Pseudopseudohypoparathyroidism MIM#612463;Pseudohypoparathyroidism MIM#612462, MIM#603233, MIM#103580  |
| 10 | GOT2    | BIALLELIC                              | Developmental and epileptic encephalopathy 82, MIM#618721                                              |
| 11 | GPIHBP1 | BIALLELIC                              | Hyperlipoproteinemia, type 1D MIM#615947;familial chylomicronemia syndrome                             |
| 12 | GREB1L  | MONOALLELIC                            | Deafness, autosomal dominant 80MIM#619274                                                              |
| 13 | GRHPR   | BIALLELIC                              | Hyperoxaluria, primary, type II, MIM# 260000                                                           |
| 14 | GRXCR1  | BIALLELIC                              | Deafness, autosomal recessive 25, MIM#613285                                                           |
| 15 | GUSB    | BIALLELIC                              | Mucopolysaccharidosis VII, MIM#253220                                                                  |
| 16 | GYS2    | BIALLELIC                              | Glycogen storage disease 0, liver (MIM#240600)                                                         |
| 17 | HADH    | BIALLELIC                              | 3-hydroxyacyl-CoA dehydrogenase deficiency, MIM# 231530                                                |
| 18 | HADHA   | BIALLELIC                              | Mitochondrial trifunctional protein deficiency, MIM#609015;LCHAD deficiency, MIM#609016                |
| 19 | HADHB   | BIALLELIC                              | Mitochondrial trifunctional protein deficiency, MIM#609015                                             |
| 20 | HAX1    | BIALLELIC                              | Neutropenia, severe congenital 3, autosomal recessive, MIM# 610738;Kostmann syndrome MONDO:0012548     |
| 21 | HBB     | BIALLELIC                              | Sickle cell anaemia, MIM# 603903                                                                       |
| 22 | HELLS   | BIALLELIC                              | Immunodeficiency-centromeric instability-facial anomalies syndrome 4, MIM# 616911                      |
| 23 | HESX1   | BOTH monoallelic and biallelic         | Pituitary hormone deficiency, combined, 5, MIM# 182230                                                 |
| 24 | HGF     | BIALLELIC                              | Deafness, autosomal recessive 39, MIM# 608265                                                          |
| 25 | HIBCH   | BIALLELIC                              | 3-hydroxyisobutryl-CoA hydrolase deficiency MIM#250620                                                 |
| 26 | HK1     | MONOALLELIC                            | Hyperinsulinism MONDO:0002177, HK1-related                                                             |
| 27 | HLC5    | BIALLELIC                              | Holocarboxylase synthetase deficiency, MIM#253270                                                      |
| 28 | HMGCL   | BIALLELIC                              | 3-hydroxy-3-methylglutaric aciduria, MIM#246450                                                        |
| 29 | HOGA1   | BIALLELIC                              | Hyperoxaluria, primary, type III MIM#613616                                                            |
| 30 | HSD11B2 | BIALLELIC                              | Apparent mineralocorticoid excess, MIM# 218030;MONDO:0009025                                           |
| 31 | HSD3B2  | BIALLELIC                              | Adrenal hyperplasia, congenital, due to 3-beta-hydroxysteroid dehydrogenase 2 deficiency MIM# 201810   |
| 32 | HSD3B7  | BIALLELIC                              | Bile acid synthesis defect, congenital, 1 MIM#607765                                                   |
| 33 | ICOS    | BIALLELIC                              | Immunodeficiency, common variable, 1 MIM# 607594                                                       |
| 34 | IDS     | X-LINKED: hemizygous mutation in males | Mucopolysaccharidosis II (MPS2, Hunter syndrome) 309900                                                |
| 35 | IDUA    | BIALLELIC                              | Mucopolysaccharidosis type 1, MONDO:0001586                                                            |
| 36 | IFITM5  | MONOALLELIC                            | Osteogenesis imperfecta, type V MIM#610967                                                             |
| 37 | IGF1    | BIALLELIC                              | Insulin-like growth factor I deficiency, MIM# 608747                                                   |
| 38 | IGHM    | BIALLELIC                              | Agammaglobulinaemia 1, MIM#601495                                                                      |
| 39 | IGLL1   | BIALLELIC                              | Agammaglobulinaemia 2, MIM#613500                                                                      |
| 40 | IGSF1   | X-LINKED: hemizygous mutation in males | Hypothyroidism, central, and testicular enlargement, MIM# 300888                                       |
| 41 | IKBKB   | BIALLELIC                              | Immunodeficiency 15B, MIM#615592                                                                       |
| 42 | IKZF1   | MONOALLELIC                            | Immunodeficiency, common variable, 13 MIM# 616873                                                      |
| 43 | IL10    | BIALLELIC                              | Autoinflammatory syndrome, MONDO:0019751, IL10-related                                                 |
| 44 | IL10RA  | BIALLELIC                              | Inflammatory bowel disease 28, early onset, autosomal recessive, MIM# 613148                           |
| 45 | IL10RB  | BIALLELIC                              | Inflammatory bowel disease 25, early onset, autosomal recessive, MIM#612567                            |
| 46 | IL1RN   | BIALLELIC                              | Interleukin 1 receptor antagonist deficiency, MIM# 612852                                              |
| 47 | IL21R   | BIALLELIC                              | Immunodeficiency 56, MIM# 615207                                                                       |
| 48 | IL2RA   | BIALLELIC                              | Immunodeficiency 41 with lymphoproliferation and autoimmunity, MIM# 606367                             |
| 49 | IL2RB   | BIALLELIC                              | Immunodeficiency 63 with lymphoproliferation and autoimmunity, MIM#618495                              |
| 50 | IL2RG   | X-LINKED: hemizygous mutation in males | Severe combined immunodeficiency, X-linked, MIM#312863                                                 |
| 51 | IL36RN  | BIALLELIC                              | Psoriasis 14, pustular, MIM# 614204                                                                    |
| 52 | IL7R    | BIALLELIC                              | Severe combined immunodeficiency, T-cell negative, B-cell/natural killer cell-positive type MIM#608971 |
| 53 |         |                                        |                                                                                                        |
| 54 |         |                                        |                                                                                                        |
| 55 |         |                                        |                                                                                                        |
| 56 |         |                                        |                                                                                                        |
| 57 |         |                                        |                                                                                                        |
| 58 |         |                                        |                                                                                                        |
| 59 |         |                                        |                                                                                                        |
| 60 |         |                                        |                                                                                                        |

|    |          |                                        |                                                                                |
|----|----------|----------------------------------------|--------------------------------------------------------------------------------|
| 1  |          |                                        |                                                                                |
| 2  |          |                                        |                                                                                |
| 3  | ILDR1    | BIALLELIC                              | Deafness, autosomal recessive 42, MIM# 609646                                  |
| 4  |          |                                        | Diabetes mellitus, insulin-dependent, 2, MIM# 125852;Diabetes mellitus,        |
| 5  | INS      | BOTH monoallelic and biallelic         | permanent neonatal 4, MIM# 618858;Maturity-onset diabetes of the young,        |
| 6  |          |                                        | type 10, MIM# 613370                                                           |
| 7  | IRAK4    | BIALLELIC                              | Immunodeficiency 67, MIM#607676                                                |
| 8  | IRF8     | BIALLELIC                              | Immunodeficiency 32B, monocyte and dendritic cell deficiency, autosomal        |
| 9  |          |                                        | recessive, MIM# 226990                                                         |
| 10 | IRS4     | X-LINKED: hemizygous mutation in males | Hypothyroidism, congenital, nongoitrous, 9, MIM# 301035                        |
| 11 | ITGA2B   | BIALLELIC                              | Glanzmann thrombasthaenia 1, MIM# 273800                                       |
| 12 | ITGB2    | BIALLELIC                              | Leukocyte adhesion deficiency, MIM#116920                                      |
| 13 | ITGB3    | BIALLELIC                              | Glanzmann thrombasthenia 2, MIM#619267                                         |
| 14 | ITK      | BIALLELIC                              | Lymphoproliferative syndrome 1, MIM#613011                                     |
| 15 | IVD      | BIALLELIC                              | Isovaleric acidemia, MIM#243500                                                |
| 16 | IYD      | BIALLELIC                              | Thyroid dysmorphogenesis 4, MIM# 274800                                        |
| 17 | JAGN1    | BIALLELIC                              | Neutropenia, severe congenital, 6, autosomal recessive, MIM# 616022            |
| 18 | JAK3     | BIALLELIC                              | SCID, autosomal recessive, T-negative/B-positive type, MIM#600802              |
| 19 | KCNH2    | MONOALLELIC                            | Long QT syndrome 2, MIM# 613688                                                |
| 20 | KCNJ1    | BIALLELIC                              | Bartter syndrome, type 2, 241200                                               |
| 21 | KCNJ11   | BOTH monoallelic and biallelic         | Diabetes mellitus, transient neonatal, 3 610582;Diabetes, permanent            |
| 22 |          |                                        | neonatal, with or without neurologic features 606176;Hyperinsulinemic          |
| 23 | KCNJ2    | MONOALLELIC                            | hypoglycemia, familial, 2 601820                                               |
| 24 | KCNQ1    | BOTH monoallelic and biallelic         | Andersen syndrome MIM#170390                                                   |
| 25 |          |                                        | Jervell and Lange-Nielsen syndrome MIM#220400;Long QT syndrome 1, MIM#         |
| 26 | KDEL2    | BIALLELIC                              | 192500                                                                         |
| 27 | KLHL3    | BOTH monoallelic and biallelic         | Osteogenesis imperfecta 21, MIM# 619131                                        |
| 28 | LAMA2    | BIALLELIC                              | Pseudohypoadosteronism, type IID, MIM# 614495                                  |
| 29 |          |                                        | Muscular dystrophy, congenital, merosin deficient or partially deficient, MIM# |
| 30 | LAT      | BIALLELIC                              | 607855                                                                         |
| 31 | LDLR     | BIALLELIC                              | Immunodeficiency 52, MIM# 617514                                               |
| 32 | LEP      | BIALLELIC                              | Hypercholesterolemia, familial, 1, MIM# 143890                                 |
| 33 | LEPR     | BIALLELIC                              | Obesity, morbid, due to leptin deficiency (MIM#614962)                         |
| 34 | LHFPL5   | BIALLELIC                              | Obesity, morbid, due to leptin receptor deficiency (MIM#614963)                |
| 35 | LHX3     | BIALLELIC                              | Deafness, autosomal recessive 67, MIM# 610265                                  |
| 36 | LHX4     | MONOALLELIC                            | Pituitary hormone deficiency, combined, MIM#221750                             |
| 37 | LIG1     | BIALLELIC                              | Pituitary hormone deficiency, combined, 4, MIM#262700                          |
| 38 | LIG4     | BIALLELIC                              | Immunodeficiency 96, MIM#619774                                                |
| 39 | LIPA     | BIALLELIC                              | LIG4 syndrome, MIM# 606593                                                     |
| 40 | LMBRD1   | BIALLELIC                              | Wolman syndrome, MIM#278000                                                    |
| 41 | LOXHD1   | BIALLELIC                              | Methylmalonic aciduria and homocystinuria, MIM#277380                          |
| 42 | LPL      | BIALLELIC                              | Deafness, autosomal recessive 77, MIM# 613079                                  |
| 43 | LRBA     | BIALLELIC                              | Lipoprotein lipase deficiency, MIM# 238600                                     |
| 44 | LRP5     | BIALLELIC                              | Immunodeficiency, common variable, 8, with autoimmunity MIM# 614700            |
| 45 | LRTOMT   | BIALLELIC                              | Osteoporosis-pseudoglioma syndrome, MIM# 259770                                |
| 46 | LYST     | BIALLELIC                              | Deafness, autosomal recessive 63, MIM# 611451                                  |
| 47 | MAFB     | MONOALLELIC                            | Chediak-Higashi syndrome, MIM#214500                                           |
| 48 | MAGT1    | X-LINKED: hemizygous mutation in males | Multicentric carpotarsal osteolysis syndrome (MIM#166300)                      |
| 49 | MALT1    | BIALLELIC                              | Immunodeficiency, X-linked, with magnesium defect, Epstein-Barr virus          |
| 50 | MAN2B1   | BIALLELIC                              | infection and neoplasia (MIM# 300853)                                          |
| 51 | MARVELD2 | BIALLELIC                              | Immunodeficiency 12 MIM# 615468                                                |
| 52 | MC2R     | BIALLELIC                              | Mannosidosis, alpha-, types I and II, MIM# 248500                              |
| 53 | MCEE     | BIALLELIC                              | Deafness, autosomal recessive 49, MIM# 610153                                  |
| 54 | MEFV     | BIALLELIC                              | Glucocorticoid deficiency, due to ACTH unresponsiveness, MIM#202200            |
| 55 | MESD     | BIALLELIC                              | Methylmalonyl-CoA epimerase deficiency MIM#251120                              |
| 56 | MITF     | BOTH monoallelic and biallelic         | Familial Mediterranean fever MIM# 249100                                       |
| 57 | MLH1     | BIALLELIC                              | Osteogenesis imperfecta, type XX, MIM#618644                                   |
| 58 | MLYCD    | BIALLELIC                              | Waardenburg syndrome, type 2A, MIM# 193510;Deafness                            |
| 59 | MMAA     | BIALLELIC                              | Mismatch repair cancer syndrome 1, MIM# 276300                                 |
| 60 | MMAB     | BIALLELIC                              | Malonyl-CoA decarboxylase deficiency, MIM# 248360                              |
|    |          |                                        | Methylmalonic aciduria, vitamin B12-responsive, MIM#251100                     |
|    |          |                                        | Methylmalonic aciduria, vitamin B12-responsive, due to defect in synthesis of  |
|    |          |                                        | adenosylcobalamin, cblB complementation type, MIM#251110                       |

|    |         |                                        |                                                                                                                           |
|----|---------|----------------------------------------|---------------------------------------------------------------------------------------------------------------------------|
| 1  |         |                                        |                                                                                                                           |
| 2  |         |                                        |                                                                                                                           |
| 3  | MMACHC  | BIALLELIC                              | Methylmalonic aciduria and homocystinuria, cbIC type, MIM#277400                                                          |
| 4  | MMADHC  | BIALLELIC                              | Methylmalonic aciduria and homocystinuria, cbID type, MIM#277410                                                          |
| 5  | MNX1    | BIALLELIC                              | Permanent neonatal diabetes mellitus, MONDO:0100164, MNX1-related                                                         |
| 6  | MOC51   | BIALLELIC                              | Molybdenum cofactor deficiency, MIM#252150                                                                                |
| 7  | MPI     | BIALLELIC                              | Congenital disorder of glycosylation, type Ib, MIM# 602579                                                                |
| 8  | MPL     | BIALLELIC                              | Thrombocytopenia, congenital amegakaryocytic, MIM# 604498                                                                 |
| 9  | MRAP    | BIALLELIC                              | Glucocorticoid deficiency 2, MIM#607398                                                                                   |
| 10 | MSH2    | BIALLELIC                              | Mismatch repair cancer syndrome 2, MIM# 619096                                                                            |
| 11 | MSH6    | BIALLELIC                              | Mismatch repair cancer syndrome 3, MIM# 619097                                                                            |
| 12 | MTHFD1  | BIALLELIC                              | Combined immunodeficiency and megaloblastic anemia with or without hyperhomocysteinaemia MIM # 617780                     |
| 13 |         |                                        |                                                                                                                           |
| 14 | MTR     | BIALLELIC                              | Homocystinuria-megaloblastic anaemia, cblG complementation type, MIM# 250940                                              |
| 15 | MT-RNR1 | MITOCHONDRIAL                          | Aminoglycoside sensitivity                                                                                                |
| 16 | MTRR    | BIALLELIC                              | Methylmalonic aciduria and homocystinuria, MIM#236270                                                                     |
| 17 | MTTP    | BIALLELIC                              | Abetalipoproteinemia, MIM# 200100                                                                                         |
| 18 | MUSK    | BIALLELIC                              | Congenital myasthenic syndrome, MIM#616325                                                                                |
| 19 | MUT     | BIALLELIC                              | Methylmalonic aciduria, mut(O) type, MIM#251000                                                                           |
| 20 | MVK     | BIALLELIC                              | Mevalonic aciduria, MIM# 610377                                                                                           |
| 21 | MYD88   | BIALLELIC                              | Immunodeficiency 68, MIM# 612260                                                                                          |
| 22 | MYH7    | BIALLELIC                              | Cardiomyopathy, hypertrophic, 1, MIM# 192600                                                                              |
| 23 | MYO15A  | BIALLELIC                              | Deafness, autosomal recessive 3, MIM# 600316                                                                              |
| 24 | MYO3A   | BIALLELIC                              | Deafness, autosomal recessive 30, MIM:607101                                                                              |
| 25 | MYO6    | BIALLELIC                              | Deafness, autosomal recessive 37, MIM# 607821                                                                             |
| 26 | MYO7A   | BIALLELIC                              | Deafness, autosomal recessive 2, 600060;Usher syndrome, type 1B, MIM# 276900                                              |
| 27 |         |                                        |                                                                                                                           |
| 28 | MYSM1   | BIALLELIC                              | Bone marrow failure syndrome 4, MIM#618116                                                                                |
| 29 | NAGLU   | BIALLELIC                              | Mucopolysaccharidosis type IIIB (Sanfilippo B), MIM# 252920                                                               |
| 30 | NAGS    | BIALLELIC                              | N-acetylglutamate synthetase deficiency, MIM#237310                                                                       |
| 31 | NCF2    | BIALLELIC                              | Chronic granulomatous disease, MIM#233710                                                                                 |
| 32 | NCF4    | BIALLELIC                              | Granulomatous disease, chronic, autosomal recessive, cytochrome b-positive, type III MIM#613960                           |
| 33 | NEUROG3 | BIALLELIC                              | Diarrhoea 4, malabsorptive, congenital, MIM# 610370                                                                       |
| 34 | NFKBIA  | MONOALLELIC                            | Ectodermal dysplasia and immunodeficiency 2 MIM# 612132                                                                   |
| 35 |         |                                        |                                                                                                                           |
| 36 | NHEJ1   | BIALLELIC                              | Severe combined immunodeficiency with microcephaly, growth retardation, and sensitivity to ionizing radiation, MIM#611291 |
| 37 | NIPAL4  | BIALLELIC                              | Ichthyosis, congenital, autosomal recessive 6, MIM# 612281                                                                |
| 38 | NKX2-1  | MONOALLELIC                            | Choreoathetosis, hypothyroidism, and neonatal respiratory distress MIM#610978                                             |
| 39 |         |                                        |                                                                                                                           |
| 40 | NKX2-5  | MONOALLELIC                            | Atrial septal defect 7, with or without AV conduction defects, MIM#108900                                                 |
| 41 | NNT     | BIALLELIC                              | Glucocorticoid deficiency 4, with or without mineralocorticoid deficiency, MIM#614736                                     |
| 42 |         |                                        |                                                                                                                           |
| 43 | NPC1    | BIALLELIC                              | Niemann-Pick disease type C1, MIM#257220                                                                                  |
| 44 | NPC2    | BIALLELIC                              | Niemann-Pick disease type C2, MIM#607625                                                                                  |
| 45 | NR0B1   | X-LINKED: hemizygous mutation in males | Adrenal hypoplasia, congenital (MIM# 300200)                                                                              |
| 46 | NR3C2   | MONOALLELIC                            | Pseudohypoaldosteronism type I, autosomal dominant, MIM#177735                                                            |
| 47 | NR5A1   | MONOALLELIC                            | Adrenocortical insufficiency, (MIM#612964)                                                                                |
| 48 | OAS1    | MONOALLELIC                            | Immunodeficiency 100 with pulmonary alveolar proteinosis and hypogammaglobulinaemia, MIM#618042                           |
| 49 |         |                                        |                                                                                                                           |
| 50 | OAT     | BIALLELIC                              | Gyrate atrophy of choroid and retina with or without ornithinemia MIM#258870                                              |
| 51 | ORAI1   | BIALLELIC                              | Immunodeficiency 9, MIM# 612782                                                                                           |
| 52 | OTC     | X-LINKED: hemizygous mutation in males | Ornithine transcarbamylase deficiency, MIM#311250                                                                         |
| 53 | OTOA    | BIALLELIC                              | Deafness, autosomal recessive 22, MIM#607039                                                                              |
| 54 | OTOF    | BIALLELIC                              | Deafness, autosomal recessive 9, MIM#601071                                                                               |
| 55 | OTOG    | BIALLELIC                              | Deafness, autosomal recessive 18B - MIM#614945                                                                            |
| 56 | OTOGL   | BIALLELIC                              | Deafness, autosomal recessive 84B, MIM# 614944                                                                            |
| 57 | OTULIN  | BIALLELIC                              | Autoinflammation, panniculitis, and dermatosis syndrome, MIM# 617099                                                      |
| 58 | OTX2    | MONOALLELIC                            | Pituitary hormone deficiency, combined, 6, MIM# 613986                                                                    |
| 59 | OXCT1   | BIALLELIC                              | Succinyl CoA:3-oxoacid CoA transferase deficiency, MIM#245050                                                             |
| 60 | P3H1    | BIALLELIC                              | Osteogenesis imperfecta, type VIII, (MIM# 610915)                                                                         |

|    |         |                                        |                                                                                                                                                                        |
|----|---------|----------------------------------------|------------------------------------------------------------------------------------------------------------------------------------------------------------------------|
| 1  |         |                                        |                                                                                                                                                                        |
| 2  |         |                                        |                                                                                                                                                                        |
| 3  | PAH     | BIALLELIC                              | Phenylketonuria, MIM#261600                                                                                                                                            |
| 4  | PALB2   | BIALLELIC                              | Fanconi anemia, complementation group N, MIM# 610832                                                                                                                   |
| 5  | PAX3    | MONOALLELIC                            | Waardenburg syndrome, type 1, OMIM 193500                                                                                                                              |
| 6  | PAX8    | MONOALLELIC                            | Hypothyroidism, congenital, due to thyroid dysgenesis or hypoplasia, MIM#218700                                                                                        |
| 7  |         |                                        |                                                                                                                                                                        |
| 8  | PC      | BIALLELIC                              | Pyruvate carboxylase deficiency, MIM# 266150                                                                                                                           |
| 9  | PCBD1   | BIALLELIC                              | Hyperphenylalaninemia, BH4-deficient, D, MIM#264070                                                                                                                    |
| 10 | PCCA    | BIALLELIC                              | Propionic acidaemia, MIM#606054                                                                                                                                        |
| 11 | PCCB    | BIALLELIC                              | Propionicacidaemia, MIM#606054                                                                                                                                         |
| 12 | PCDH15  | BIALLELIC                              | Usher syndrome, type 1F 602083, Deafness, autosomal recessive 23 609533                                                                                                |
| 13 | PCSK9   | MONOALLELIC                            | Hypercholesterolaemia, familial, 3, MIM# 603776                                                                                                                        |
| 14 | PDHA1   | X-LINKED: hemizygous mutation in males | Pyruvate dehydrogenase E1-alpha deficiency, MIM# 312170                                                                                                                |
| 15 | PDHB    | BIALLELIC                              | Pyruvate dehydrogenase E1-beta deficiency, MIM#614111                                                                                                                  |
| 16 | PDHX    | BIALLELIC                              | Lactic acidaemia due to PDX1 deficiency, MIM# 245349                                                                                                                   |
| 17 | PDP1    | BIALLELIC                              | Pyruvate dehydrogenase phosphatase deficiency, MIM# 608782                                                                                                             |
| 18 | PDX1    | BIALLELIC                              | Pancreatic agenesis, MIM# # 260370                                                                                                                                     |
| 19 | PDZD7   | BIALLELIC                              | Deafness, autosomal recessive 57, MIM# 618003;Usher syndrome, type IIC, GPR98/PDZD7 digenic, MIM# 605472                                                               |
| 20 | PGM1    | BIALLELIC                              | Congenital disorder of glycosylation, type It, MIM#614921                                                                                                              |
| 21 | PGM3    | BIALLELIC                              | Immunodeficiency 23, MIM#615816                                                                                                                                        |
| 22 | PHEX    | X-LINKED: hemizygous mutation in males | Hypophosphatemic rickets, X-linked dominant, MIM#307800                                                                                                                |
| 23 | PHGDH   | BIALLELIC                              | Phosphoglycerate dehydrogenase deficiency, MIM#601815                                                                                                                  |
| 24 | PHKA2   | X-LINKED: hemizygous mutation in males | Glycogen storage disease, type IXa1 and a2, MIM# 306000                                                                                                                |
| 25 | PHKB    | BIALLELIC                              | Phosphorylase kinase deficiency of liver and muscle, autosomal recessive 261750;Glycogen storage disease IXb, MONDO:0009868                                            |
| 26 | PHKG2   | BIALLELIC                              | Glycogen storage disease IXc, MIM# 613027                                                                                                                              |
| 27 | PIK3CD  | BOTH monoallelic and biallelic         | Immunodeficiency 14B, autosomal recessive, MIM# 619281;Immunodeficiency 14A, autosomal dominant, MIM# 615513                                                           |
| 28 | PIK3R1  | BOTH monoallelic and biallelic         | Agammaglobulinemia 7, autosomal recessive, MIM# 615214;Immunodeficiency 36, MIM#616005                                                                                 |
| 29 | PKLR    | BIALLELIC                              | Pyruvate kinase deficiency, MIM#266200                                                                                                                                 |
| 30 | PLG     | BIALLELIC                              | Plasminogen deficiency, type I, MIM# 217090                                                                                                                            |
| 31 | PLPBP   | BIALLELIC                              | Epilepsy, early-onset, vitamin B6-dependent, MIM#617290                                                                                                                |
| 32 | PLS3    | X-LINKED: hemizygous mutation in males | Bone mineral density QTL18, osteoporosis - MIM#300910                                                                                                                  |
| 33 | PNP     | BIALLELIC                              | Immunodeficiency due to purine nucleoside phosphorylase deficiency MIM#613179                                                                                          |
| 34 | PNPO    | BIALLELIC                              | Pyridoxamine 5'-phosphate oxidase deficiency, MIM# 610090                                                                                                              |
| 35 | POLE    | BIALLELIC                              | IMAGE-I syndrome, MIM#618336                                                                                                                                           |
| 36 | POMC    | BIALLELIC                              | Obesity, adrenal insufficiency, and red hair due to POMC deficiency MIM#609734                                                                                         |
| 37 |         |                                        |                                                                                                                                                                        |
| 38 | POR     | BIALLELIC                              | Antley-Bixler syndrome with genital anomalies and disordered steroidogenesis, MIM#201750;Disordered steroidogenesis due to cytochrome P450 oxidoreductase, MIM# 613571 |
| 39 | POU1F1  | BOTH monoallelic and biallelic         | Pituitary hormone deficiency, combined, 1 MIM# 613038                                                                                                                  |
| 40 | POU3F4  | X-LINKED: hemizygous mutation in males | Deafness, X-linked 2, MIM#304400                                                                                                                                       |
| 41 | PPOX    | BIALLELIC                              | Variagate porphyria, childhood-onset, MIM# 620483                                                                                                                      |
| 42 | PRDX1   | Other                                  | Methylmalonic aciduria and homocystinuria, cb1C type, digenic MIM#277400                                                                                               |
| 43 | PRF1    | BIALLELIC                              | Haemophagocytic lymphohistiocytosis, familial, 2, MIM#603553                                                                                                           |
| 44 | PRKAR1A | MONOALLELIC                            | Carney complex, type 1, MIM# 160980                                                                                                                                    |
| 45 | PRKDC   | BIALLELIC                              | Immunodeficiency 26, with or without neurologic abnormalities, MIM#615966                                                                                              |
| 46 | PROP1   | BIALLELIC                              | Pituitary hormone deficiency, combined, 2, MIM#262600                                                                                                                  |
| 47 | PSTPIP1 | MONOALLELIC                            | Pyogenic sterile arthritis, pyoderma gangrenosum, and acne, MIM# 604416                                                                                                |
| 48 | PTCH1   | MONOALLELIC                            | Basal cell nevus syndrome, MIM# 109400                                                                                                                                 |
| 49 | PTF1A   | BIALLELIC                              | Pancreatic and cerebellar agenesis, MIM#609069;Pancreatic agenesis 2, MIM#615935                                                                                       |
| 50 | PTPRC   | BIALLELIC                              | Severe combined immunodeficiency, T cell-negative, B-cell/natural killer-cell positive MIM# 608971                                                                     |
| 51 | PTPRQ   | BOTH monoallelic and biallelic         | Deafness, autosomal recessive 84A, MIM# 613391;Deafness, autosomal dominant 73, MIM# 617663                                                                            |
| 52 | PTS     | BIALLELIC                              | Hyperphenylalaninemia, BH4-deficient, A, MIM#261640                                                                                                                    |
| 53 | PYGL    | BIALLELIC                              | Glycogen storage disease VI, MIM# 232700                                                                                                                               |

|    |          |                                        |                                                                                                                                                                                                                                                                                                               |
|----|----------|----------------------------------------|---------------------------------------------------------------------------------------------------------------------------------------------------------------------------------------------------------------------------------------------------------------------------------------------------------------|
| 1  |          |                                        |                                                                                                                                                                                                                                                                                                               |
| 2  |          |                                        |                                                                                                                                                                                                                                                                                                               |
| 3  | QDPR     | BIALLELIC                              | Dihydropteridine reductase deficiency, MIM#261630                                                                                                                                                                                                                                                             |
| 4  | RAB27A   | BIALLELIC                              | Griscelli syndrome, MIM#607624                                                                                                                                                                                                                                                                                |
| 5  | RAC2     | MONOALLELIC                            | Immunodeficiency 73B with defective neutrophil chemotaxis and lymphopenia<br>MIM# 618986                                                                                                                                                                                                                      |
| 6  |          |                                        |                                                                                                                                                                                                                                                                                                               |
| 7  |          |                                        | Alpha/beta T-cell lymphopenia with gamma/delta T-cell expansion, severe<br>cytomegalovirus infection, and autoimmunity MIM# 609889;Combined cellular<br>and humoral immune defects with granulomas MIM# 233650;Omenn<br>syndrome MIM# 603554;Severe combined immunodeficiency, B cell-negative<br>MIM# 601457 |
| 8  | RAG1     | BIALLELIC                              |                                                                                                                                                                                                                                                                                                               |
| 9  |          |                                        |                                                                                                                                                                                                                                                                                                               |
| 10 |          |                                        |                                                                                                                                                                                                                                                                                                               |
| 11 |          |                                        |                                                                                                                                                                                                                                                                                                               |
| 12 | RAG2     | BIALLELIC                              | Omenn syndrome MIM# 603554;Severe combined immunodeficiency, B cell-<br>negative MIM# 601457;Combined cellular and humoral immune defects with<br>granulomas MIM# 233650                                                                                                                                      |
| 13 |          |                                        |                                                                                                                                                                                                                                                                                                               |
| 14 | RAPSN    | BIALLELIC                              | Myasthenic syndrome, congenital, 11, associated with acetylcholine receptor<br>deficiency (MIM#616326)                                                                                                                                                                                                        |
| 15 | RASGRP1  | BIALLELIC                              | Immunodeficiency 64 (MIM#618534)                                                                                                                                                                                                                                                                              |
| 16 | RB1      | MONOALLELIC                            | Retinoblastoma, MIM# 180200                                                                                                                                                                                                                                                                                   |
| 17 | RDX      | BIALLELIC                              | Deafness, autosomal recessive 24, MIM# 611022                                                                                                                                                                                                                                                                 |
| 18 | REST     | MONOALLELIC                            | {Wilms tumor 6, susceptibility to}, MIM# 616806                                                                                                                                                                                                                                                               |
| 19 | RET      | MONOALLELIC                            | Multiple endocrine neoplasia IIB;Multiple endocrine neoplasia IIA                                                                                                                                                                                                                                             |
| 20 |          |                                        | Bare lymphocyte syndrome, type II, complementation group C MIM#<br>209920;Bare lymphocyte syndrome, type II, complementation group E MIM#<br>209920                                                                                                                                                           |
| 21 | RFX5     | BIALLELIC                              |                                                                                                                                                                                                                                                                                                               |
| 22 |          |                                        |                                                                                                                                                                                                                                                                                                               |
| 23 | RFXANK   | BIALLELIC                              | MHC class II deficiency, complementation group B, MIM#209920                                                                                                                                                                                                                                                  |
| 24 | RFXAP    | BIALLELIC                              | Bare lymphocyte syndrome, type II, complementation group D MIM# 209920                                                                                                                                                                                                                                        |
| 25 | RMRP     | BIALLELIC                              | Cartilage-hair hypoplasia MIM#250250                                                                                                                                                                                                                                                                          |
| 26 | RNPC3    | BIALLELIC                              | Pituitary hormone deficiency, combined or isolated, 7, MIM# 618160                                                                                                                                                                                                                                            |
| 27 | RPE65    | BIALLELIC                              | Leber congenital amaurosis 2 MIM#204100;Retinitis pigmentosa 20<br>MIM#613794                                                                                                                                                                                                                                 |
| 28 |          |                                        |                                                                                                                                                                                                                                                                                                               |
| 29 | RPL11    | MONOALLELIC                            | Diamond-Blackfan anaemia, MIM#612562                                                                                                                                                                                                                                                                          |
| 30 | RPL15    | MONOALLELIC                            | Diamond-Blackfan anaemia 12 , MIM#615550                                                                                                                                                                                                                                                                      |
| 31 | RPL35A   | MONOALLELIC                            | Diamond-Blackfan anaemia 5, MIM#612528                                                                                                                                                                                                                                                                        |
| 32 | RPL5     | MONOALLELIC                            | Diamond-Blackfan anaemia, MIM#612561                                                                                                                                                                                                                                                                          |
| 33 | RPS10    | MONOALLELIC                            | Diamond-Blackfan anaemia 9, MIM#613308                                                                                                                                                                                                                                                                        |
| 34 | RPS17    | MONOALLELIC                            | Diamond-Blackfan anaemia, MIM#612527                                                                                                                                                                                                                                                                          |
| 35 | RPS19    | MONOALLELIC                            | Diamond-Blackfan anaemia, MIM#105650                                                                                                                                                                                                                                                                          |
| 36 | RPS24    | MONOALLELIC                            | Diamond-Blackfan anaemia, MIM#610629                                                                                                                                                                                                                                                                          |
| 37 | RPS26    | MONOALLELIC                            | Diamond-Blackfan anaemia, MIM#613309                                                                                                                                                                                                                                                                          |
| 38 | RPS7     | MONOALLELIC                            | Diamond-Blackfan anaemia 8, MIM#612563                                                                                                                                                                                                                                                                        |
| 39 | RUNX1    | MONOALLELIC                            | Platelet disorder, familial, with associated myeloid malignancy, MIM# 601399                                                                                                                                                                                                                                  |
| 40 | RYR1     | MONOALLELIC                            | {Malignant hyperthermia susceptibility 1} MIM#145600                                                                                                                                                                                                                                                          |
| 41 | RYR2     | MONOALLELIC                            | Arrhythmogenic right ventricular dysplasia 2;Ventricular tachycardia,<br>catecholaminergic polymorphic                                                                                                                                                                                                        |
| 42 |          |                                        |                                                                                                                                                                                                                                                                                                               |
| 43 | S1PR2    | BIALLELIC                              | Deafness, autosomal recessive 68, MIM# 610419                                                                                                                                                                                                                                                                 |
| 44 | SAMD9    | MONOALLELIC                            | MIRAGE syndrome, MIM#617053                                                                                                                                                                                                                                                                                   |
| 45 | SAMD9L   | MONOALLELIC                            | Ataxia-pancytopenia syndrome, MIM# 159550                                                                                                                                                                                                                                                                     |
| 46 | SAR1B    | BIALLELIC                              | Chylomicron retention disease, MIM# 246700                                                                                                                                                                                                                                                                    |
| 47 | SBDS     | BIALLELIC                              | Shwachman-Diamond syndrome, MIM# 260400                                                                                                                                                                                                                                                                       |
| 48 | SCNN1A   | BIALLELIC                              | Pseudohypoaldosteronism, type I, MIM# 264350                                                                                                                                                                                                                                                                  |
| 49 | SCNN1B   | BIALLELIC                              | Pseudohypoaldosteronism, type I MIM# 264350                                                                                                                                                                                                                                                                   |
| 50 | SCNN1G   | BIALLELIC                              | Pseudohypoaldosteronism, type I, MIM#264350                                                                                                                                                                                                                                                                   |
| 51 | SERPINF1 | BIALLELIC                              | Osteogenesis imperfecta, type VI, MIM# 613982                                                                                                                                                                                                                                                                 |
| 52 | SERPINH1 | BIALLELIC                              | Osteogenesis imperfecta, type X, MIM#613848                                                                                                                                                                                                                                                                   |
| 53 | SGPL1    | BIALLELIC                              | Nephrotic syndrome, type 14 MIM#617575                                                                                                                                                                                                                                                                        |
| 54 | SH2D1A   | X-LINKED: hemizygous mutation in males | Lymphoproliferative syndrome, X-linked, 1, MIM# 308240                                                                                                                                                                                                                                                        |
| 55 | SI       | BIALLELIC                              | Sucrase-isomaltase deficiency, congenital, MIM#222900                                                                                                                                                                                                                                                         |
| 56 | SLC12A1  | BIALLELIC                              | Bartter syndrome, type 1, MIM# 601678                                                                                                                                                                                                                                                                         |
| 57 | SLC18A2  | BIALLELIC                              | Parkinsonism-dystonia, infantile, 2, MIM# 618049                                                                                                                                                                                                                                                              |
| 58 | SLC18A3  | BIALLELIC                              | Myasthenic syndrome, congenital, 21, presynaptic, MIM#617239                                                                                                                                                                                                                                                  |
| 59 | SLC19A2  | BIALLELIC                              | Thiamine-responsive megaloblastic anemia syndrome, MIM# 249270                                                                                                                                                                                                                                                |
| 60 | SLC19A3  | BIALLELIC                              | Thiamine metabolism dysfunction syndrome 2 (biotin- or thiamine-responsive<br>encephalopathy type 2), MIM# 607483                                                                                                                                                                                             |



|    |          |                                        |                                                                                                                                                                                         |
|----|----------|----------------------------------------|-----------------------------------------------------------------------------------------------------------------------------------------------------------------------------------------|
| 1  |          |                                        |                                                                                                                                                                                         |
| 2  |          |                                        |                                                                                                                                                                                         |
| 3  | SLC22A5  | BIALLELIC                              | Carnitine deficiency, systemic primary, MIM# 212140, MONDO:0008919                                                                                                                      |
| 4  | SLC25A13 | BIALLELIC                              | Citrullinemia, type II, neonatal-onset, MIM# 605814                                                                                                                                     |
| 5  | SLC25A15 | BIALLELIC                              | Hyperornithinemia-hyperammonemia-homocitrullinemia syndrome, MIM#238970                                                                                                                 |
| 6  |          |                                        |                                                                                                                                                                                         |
| 7  | SLC25A19 | BIALLELIC                              | Thiamine metabolism dysfunction syndrome 4 (progressive polyneuropathy type), MIM#613710                                                                                                |
| 8  |          |                                        |                                                                                                                                                                                         |
| 9  | SLC25A20 | BIALLELIC                              | Carnitine-acylcarnitine translocase deficiency, MIM#212138                                                                                                                              |
| 10 | SLC25A38 | BIALLELIC                              | Anemia, sideroblastic, 2, pyridoxine-refractory, MIM# 205950                                                                                                                            |
| 11 | SLC26A3  | BIALLELIC                              | Diarrhoea 1, secretory chloride, congenital, MIM# 214700                                                                                                                                |
| 12 | SLC26A4  | BIALLELIC                              | Deafness, autosomal recessive 4, with enlarged vestibular aqueduct 600791;Pendred syndrome 274600                                                                                       |
| 13 | SLC26A7  | BIALLELIC                              | Congenital hypothyroidism, MONDO:0018612, SLC26A7-related                                                                                                                               |
| 14 |          |                                        |                                                                                                                                                                                         |
| 15 | SLC2A1   | BOTH monoallelic and biallelic         | GLUT1 deficiency syndrome 2, childhood onset, 612126;{Epilepsy, idiopathic generalized, susceptibility to, 12}, MIM#614847;GLUT1 deficiency syndrome 1, infantile onset, severe, 606777 |
| 16 |          |                                        |                                                                                                                                                                                         |
| 17 | SLC30A10 | BIALLELIC                              | Hypermanganesemia with dystonia 1, MIM# 613280                                                                                                                                          |
| 18 | SLC34A3  | BIALLELIC                              | Hypophosphatemic rickets with hypercalciuria, MIM#241530                                                                                                                                |
| 19 | SLC35A2  | X-LINKED: hemizygous mutation in males | Congenital disorder of glycosylation, type II m, MIM #300896                                                                                                                            |
| 20 |          |                                        |                                                                                                                                                                                         |
| 21 | SLC37A4  | BOTH monoallelic and biallelic         | Glycogen storage disease Ib, MIM# 232220;Glycogen storage disease Ic, MIM# 232240;Congenital disorder of glycosylation, type II w, MIM# 619525                                          |
| 22 | SLC39A4  | BIALLELIC                              | Acrodermatitis enteropathica, MIM# 201100                                                                                                                                               |
| 23 | SLC39A7  | BIALLELIC                              | Agammaglobulinaemia 9, autosomal recessive, MIM# 619693                                                                                                                                 |
| 24 | SLC39A8  | BIALLELIC                              | Congenital disorder of glycosylation, type II n , MIM#16721                                                                                                                             |
| 25 | SLC46A1  | BIALLELIC                              | Folate malabsorption, hereditary, MIM# 229050                                                                                                                                           |
| 26 | SLC4A1   | BIALLELIC                              | Distal renal tubular acidosis 4 with haemolytic anaemia MIM# 611590                                                                                                                     |
| 27 | SLC52A2  | BIALLELIC                              | Brown-Vialetto-Van Laere syndrome 2, MIM# 614707                                                                                                                                        |
| 28 | SLC52A3  | BIALLELIC                              | Brown-Vialetto-Van Laere syndrome 1, MIM# 211530                                                                                                                                        |
| 29 | SLC5A1   | BIALLELIC                              | Glucose/galactose malabsorption, MIM# 606824                                                                                                                                            |
| 30 | SLC5A5   | BIALLELIC                              | Thyroid dysmorphogenesis 1, MIM# 274400                                                                                                                                                 |
| 31 | SLC5A6   | BIALLELIC                              | Neurodegeneration, infantile-onset, biotin-responsive, MIM# 618973                                                                                                                      |
| 32 | SLC5A7   | BIALLELIC                              | Myasthenic syndrome, congenital, 20, presynaptic, MIM# 617143                                                                                                                           |
| 33 | SLC7A7   | BIALLELIC                              | Lysinuric protein intolerance, MIM# 222700                                                                                                                                              |
| 34 | SLITRK6  | BIALLELIC                              | Deafness and myopia MIM#221200                                                                                                                                                          |
| 35 | SLX4     | BIALLELIC                              | Fanconi anaemia, complementation group P, MIM# 613951                                                                                                                                   |
| 36 | SMAD2    | MONOALLELIC                            | Loeys-Dietz syndrome 6, MIM# 619656                                                                                                                                                     |
| 37 | SMAD3    | MONOALLELIC                            | Loeys-Dietz syndrome 3, MIM# 613795                                                                                                                                                     |
| 38 | SMARCD2  | BIALLELIC                              | Specific granule deficiency 2 MIM#617475                                                                                                                                                |
| 39 | SMN1     | BIALLELIC                              | Spinal muscular atrophy type 1, MIM#253300                                                                                                                                              |
| 40 | SMPD1    | BIALLELIC                              | Niemann-Pick disease, type A, MIM# 257200;Niemann-Pick disease, type B, MIM# 607616                                                                                                     |
| 41 | SNX10    | BIALLELIC                              | Osteopetrosis, autosomal recessive 8 MIM#615085                                                                                                                                         |
| 42 | SP110    | BIALLELIC                              | Hepatic veno-occlusive disease with immunodeficiency MIM#235550                                                                                                                         |
| 43 | SPR      | BIALLELIC                              | Dystonia, dopa-responsive, due to sepiapterin reductase deficiency, MIM# 612716                                                                                                         |
| 44 |          |                                        |                                                                                                                                                                                         |
| 45 | SRP54    | MONOALLELIC                            | Neutropenia, severe congenital, 8, autosomal dominant, MIM# 618752                                                                                                                      |
| 46 | STAR     | BIALLELIC                              | Congenital lipid adrenal hyperplasia, MIM#201710                                                                                                                                        |
| 47 | STAT1    | BIALLELIC                              | Immunodeficiency 31B, mycobacterial and viral infections, autosomal recessive MIM#613796                                                                                                |
| 48 | STAT3    | MONOALLELIC                            | Autoimmune disease, multisystem, infantile-onset, 1 MIM# 615952                                                                                                                         |
| 49 | STIM1    | BIALLELIC                              | Immunodeficiency 10 MIM612783                                                                                                                                                           |
| 50 |          |                                        |                                                                                                                                                                                         |
| 51 | STK4     | BIALLELIC                              | T-cell immunodeficiency, recurrent infections, autoimmunity, and cardiac malformations MIM#614868                                                                                       |
| 52 | STX11    | BIALLELIC                              | Haemophagocytic lymphohistiocytosis, familial, 4, MIM#603552                                                                                                                            |
| 53 | STX16    | MONOALLELIC, imprinted                 | Pseudohypoparathyroidism, type IB MIM#603233                                                                                                                                            |
| 54 | STXBP2   | BIALLELIC                              | Hemophagocytic lymphohistiocytosis, familial, 5, MIM# 613101                                                                                                                            |
| 55 |          |                                        |                                                                                                                                                                                         |
| 56 | SYT2     | BIALLELIC                              | Myasthenic syndrome, congenital, 7B, presynaptic, autosomal recessive MIM#619461                                                                                                        |
| 57 | TANGO2   | BIALLELIC                              | Metabolic encephalomyopathic crises, recurrent, with rhabdomyolysis, cardiac arrhythmias, and neurodegeneration, MIM# 616878                                                            |
| 58 |          |                                        |                                                                                                                                                                                         |
| 59 | TAT      | BIALLELIC                              | Tyrosinemia, type II, MIM#276600                                                                                                                                                        |
| 60 | TBL1X    | X-LINKED: hemizygous mutation in males | Hypothyroidism, congenital, nongoitrous, 8 MIM#301033                                                                                                                                   |

|    |           |                                        |                                                                            |
|----|-----------|----------------------------------------|----------------------------------------------------------------------------|
| 1  |           |                                        |                                                                            |
| 2  |           |                                        |                                                                            |
| 3  | TBX19     | BIALLELIC                              | Adrenocorticotrophic hormone deficiency, MIM#201400                        |
| 4  | TCF3      | BOTH monoallelic and biallelic         | Agammaglobulinaemia 8, autosomal dominant, MIM#                            |
| 5  |           |                                        | 616941;Agammaglobulinaemia 8B, autosomal recessive, MIM# 619824            |
| 6  | TCIRG1    | BIALLELIC                              | Osteopetrosis, autosomal recessive 1, MIM# 259700                          |
| 7  | TCN2      | BIALLELIC                              | Transcobalamin II deficiency MIM# 275350                                   |
| 8  | TECTA     | BOTH monoallelic and biallelic         | Deafness, autosomal recessive 21 603629;Deafness, autosomal dominant 8/12  |
| 9  |           |                                        | 601543                                                                     |
| 10 | TF        | BIALLELIC                              | Atransferrinemia MIM#209300                                                |
| 11 | TG        | BIALLELIC                              | Thyroid dysmorphogenesis 3, MIM# 274700                                    |
| 12 | TGFB2     | MONOALLELIC                            | Loeys-Dietz syndrome 4, MIM#614816                                         |
| 13 | TGFB3     | MONOALLELIC                            | Loeys-Dietz syndrome 5, MIM#615582                                         |
| 14 | TGFBR1    | MONOALLELIC                            | Loeys-Dietz syndrome 1, MIM# 609192                                        |
| 15 | TGFBR2    | MONOALLELIC                            | Loeys-Dietz syndrome 2, MIM# 610168                                        |
| 16 | TH        | BIALLELIC                              | Tyrosine hydroxylase deficiency, MIM#605407                                |
| 17 | THRA      | MONOALLELIC                            | Hypothyroidism, congenital, nongoitrous, 6, MIM# 614450                    |
| 18 | TK2       | BIALLELIC                              | Mitochondrial DNA depletion syndrome 2 (myopathic type), 609560            |
| 19 | TMC1      | BIALLELIC                              | Deafness, autosomal recessive 7 MIM#600974                                 |
| 20 | TMEM38B   | BIALLELIC                              | Osteogenesis imperfecta, type XIV, MIM#615066                              |
| 21 | TMIE      | BIALLELIC                              | Deafness, autosomal recessive 6 MIM#600971                                 |
| 22 | TMPRSS3   | BIALLELIC                              | deafness, autosomal recessive MIM#601072                                   |
| 23 | TNFRSF11A | BIALLELIC                              | Osteopetrosis, autosomal recessive 7 - MIM# 612301                         |
| 24 | TP53      | MONOALLELIC                            | Li-Fraumeni syndrome MIM#151623                                            |
| 25 | TPK1      | BIALLELIC                              | Thiamine metabolism dysfunction syndrome 5 (episodic encephalopathy type)  |
| 26 |           |                                        | MIM#614458                                                                 |
| 27 | TPO       | BIALLELIC                              | Thyroid dysmorphogenesis 2A MIM#274500                                     |
| 28 | TPP1      | BIALLELIC                              | Ceroid lipofuscinosis, neuronal, 2 MIM#204500 (Batten disease)             |
| 29 | TPRN      | BIALLELIC                              | Deafness, autosomal recessive 79, MIM# 613307                              |
| 30 | TRHR      | BIALLELIC                              | Hypothyroidism, congenital, nongoitrous, 7, MIM# 618573                    |
| 31 | TRIM28    | MONOALLELIC                            | Wilms tumour, MONDO:0006058, TRIM28-related                                |
| 32 | TRIOBP    | BIALLELIC                              | Deafness, autosomal recessive 28, MIM#609823                               |
| 33 | TRMU      | BIALLELIC                              | Liver failure, transient infantile MIM# 613070                             |
| 34 | TRPM6     | BIALLELIC                              | Hypomagnesemia 1, intestinal MIM#602014                                    |
| 35 | TSHB      | BIALLELIC                              | Hypothyroidism, congenital, nongoitrous 4, MIM#275100                      |
| 36 | TSHR      | BOTH monoallelic and biallelic         | Hypothyroidism, congenital, nongoitrous, 1 - MIM#275200                    |
| 37 | TTPA      | BIALLELIC                              | Ataxia with isolated vitamin E deficiency MIM#277460                       |
| 38 | TUBB1     | MONOALLELIC                            | Congenital hypothyroidism, MONDO:0018612, TUBB1-                           |
| 39 |           |                                        | related;Macrothrombocytopenia, autosomal dominant, TUBB1-related, OMIM     |
| 40 |           |                                        | # 613112                                                                   |
| 41 | UBE2T     | BIALLELIC                              | Fanconi anaemia, complementation group T, MIM# 616435                      |
| 42 | UGT1A1    | BIALLELIC                              | Crigler-Najjar syndrome, type I, MIM#218800                                |
| 43 | UMPS      | BIALLELIC                              | Orotic aciduria MIM#258900                                                 |
| 44 | UNC13D    | BIALLELIC                              | Haemophagocytic lymphohistiocytosis, familial, 3, MIM#608898               |
| 45 | UROS      | BIALLELIC                              | Porphyria, congenital erythropoietic MIM#263700                            |
| 46 | USH1C     | BIALLELIC                              | Usher syndrome type 1 MIM#276904                                           |
| 47 | USH1G     | BIALLELIC                              | Usher syndrome type 1 MIM#606943                                           |
| 48 | USH2A     | BIALLELIC                              | Usher Syndrome Type II MIM#276901                                          |
| 49 | VAMP1     | BIALLELIC                              | Myasthenic syndrome, congenital, 25, MIM# 618323                           |
| 50 | VDR       | BIALLELIC                              | Rickets, vitamin D-resistant, type IIA MIM#277440                          |
| 51 | VHL       | MONOALLELIC                            | von Hippel-Lindau syndrome MIM#193300                                      |
| 52 | VKORC1    | BIALLELIC                              | Vitamin K-dependent clotting factors, combined deficiency of, 2 MIM#607473 |
| 53 | VPS45     | BIALLELIC                              | Neutropenia, severe congenital, 5, autosomal recessive, MIM#615285         |
| 54 | WAS       | X-LINKED: hemizygous mutation in males | Neutropenia, severe congenital, X-linked, MIM#300299;Thrombocytopaenia, X- |
| 55 |           |                                        | linked, MIM# 313900;Wiskott-Aldrich syndrome, MIM# 301000                  |
| 56 | WDR1      | BIALLELIC                              | Periodic fever, immunodeficiency, and thrombocytopenia syndrome            |
| 57 |           |                                        | MIM#150550                                                                 |
| 58 | WDR72     | BIALLELIC                              | Amelogenesis imperfecta, type IIA3, MIM# 613211;Distal RTA                 |
| 59 |           |                                        | MONDO:0015827                                                              |
| 60 | WHRN      | BIALLELIC                              | Usher syndrome, type 2D, MIM# 611383;Deafness, autosomal recessive 31,     |
| 61 |           |                                        | MIM# 607084                                                                |
| 62 | WIPF1     | BIALLELIC                              | Wiskott-Aldrich syndrome 2 MIM#614493                                      |
| 63 | WNK1      | MONOALLELIC                            | Pseudohypoaldosteronism 2C (PHA2C), MIM#614492                             |

|    |       |                                        |                                                        |
|----|-------|----------------------------------------|--------------------------------------------------------|
| 1  |       |                                        |                                                        |
| 2  |       |                                        |                                                        |
| 3  | WNK4  | MONOALLELIC                            | Pseudohypoaldosteronism, type IIB MIM#614491           |
| 4  | WT1   | MONOALLELIC                            | Wilms tumor, type 1, MIM#194070                        |
| 5  | XIAP  | X-LINKED: hemizygous mutation in males | Lymphoproliferative syndrome, X-linked, 2, MIM# 300635 |
| 6  | XPA   | BIALLELIC                              | Xeroderma pigmentosum, group A MIM#278700              |
| 7  | XPC   | BIALLELIC                              | Xeroderma pigmentosum, group C MIM#278720              |
| 8  | ZAP70 | BIALLELIC                              | Immunodeficiency MIM#176947                            |
| 9  |       |                                        |                                                        |
| 10 |       |                                        |                                                        |
| 11 |       |                                        |                                                        |
| 12 |       |                                        |                                                        |
| 13 |       |                                        |                                                        |
| 14 |       |                                        |                                                        |
| 15 |       |                                        |                                                        |
| 16 |       |                                        |                                                        |
| 17 |       |                                        |                                                        |
| 18 |       |                                        |                                                        |
| 19 |       |                                        |                                                        |
| 20 |       |                                        |                                                        |
| 21 |       |                                        |                                                        |
| 22 |       |                                        |                                                        |
| 23 |       |                                        |                                                        |
| 24 |       |                                        |                                                        |
| 25 |       |                                        |                                                        |
| 26 |       |                                        |                                                        |
| 27 |       |                                        |                                                        |
| 28 |       |                                        |                                                        |
| 29 |       |                                        |                                                        |
| 30 |       |                                        |                                                        |
| 31 |       |                                        |                                                        |
| 32 |       |                                        |                                                        |
| 33 |       |                                        |                                                        |
| 34 |       |                                        |                                                        |
| 35 |       |                                        |                                                        |
| 36 |       |                                        |                                                        |
| 37 |       |                                        |                                                        |
| 38 |       |                                        |                                                        |
| 39 |       |                                        |                                                        |
| 40 |       |                                        |                                                        |
| 41 |       |                                        |                                                        |
| 42 |       |                                        |                                                        |
| 43 |       |                                        |                                                        |
| 44 |       |                                        |                                                        |
| 45 |       |                                        |                                                        |
| 46 |       |                                        |                                                        |
| 47 |       |                                        |                                                        |
| 48 |       |                                        |                                                        |
| 49 |       |                                        |                                                        |
| 50 |       |                                        |                                                        |
| 51 |       |                                        |                                                        |
| 52 |       |                                        |                                                        |
| 53 |       |                                        |                                                        |
| 54 |       |                                        |                                                        |
| 55 |       |                                        |                                                        |
| 56 |       |                                        |                                                        |
| 57 |       |                                        |                                                        |
| 58 |       |                                        |                                                        |
| 59 |       |                                        |                                                        |
| 60 |       |                                        |                                                        |

For peer review only
