# Supplementary material for: Prospective cohort study of genomic newborn screening: BabyScreen+ pilot study protocol
Source: PubMed Central journal article supplement — BMJ Open. 2024 Apr 3;14(4):e081426. doi: 10.1136/bmjopen-2023-081426 (PMC11146401; doi:10.1136/bmjopen-2023-081426), 2024-04-03
Supplement: bmjopen-2023-081426supp001.pdf [file bmjopen-2023-081426supp001.pdf]

Supplementary Table 1: BabyScreen+ gene panel

| Gene Name | Model_Of_Inheritance                   | Phenotypes                                                                                                    |
|-----------|----------------------------------------|---------------------------------------------------------------------------------------------------------------|
| AAAS      | BIALLELIC                              | Achalasia-addisonianism-alacrimia syndrome, MIM#231550                                                        |
| ABCC6     | BIALLELIC                              | Arterial calcification, generalized, of infancy, 2, #MIM614473                                                |
| ABCC8     | BOTH monoallelic and biallelic         | Hyperinsulinemic hypoglycemia, familial, MIM#256450                                                           |
| ABCD1     | X-LINKED: hemizygous mutation in males | Adrenoleukodystrophy, MIM# 300100                                                                             |
| ABCD4     | BIALLELIC                              | Methylmalonic aciduria and homocystinuria, cblJ type MIM#614857                                               |
| ABCG5     | BIALLELIC                              | Sitosterolaemia 2, MIM# 618666                                                                                |
| ACAD9     | BIALLELIC                              | Mitochondrial complex I deficiency, nuclear type 20, MIM#611126                                               |
| ACADM     | BIALLELIC                              | Medium chain acyl CoA dehydrogenase deficiency, MIM#201450                                                    |
| ACADVL    | BIALLELIC                              | VLCAD deficiency, MIM#201475                                                                                  |
| ACAT1     | BIALLELIC                              | Alpha-methylacetoacetic aciduria, MIM#203750                                                                  |
| ACTA2     | BOTH monoallelic and biallelic         | Aortic aneurysm, familial thoracic 6, MIM# 611788                                                             |
| ACVRL1    | MONOALLELIC                            | Telangiectasia, hereditary hemorrhagic, type 2, MIM#600376                                                    |
| ADA       | BIALLELIC                              | Severe combined immunodeficiency due to ADA deficiency, MIM# 102700, MONDO:0007064                            |
| ADA2      | BIALLELIC                              | Vasculitis, autoinflammation, immunodeficiency, and haematologic defects syndrome, MIM# 615688                |
| ADAMTS13  | BIALLELIC                              | Thrombotic thrombocytopenic purpura, familial, MIM#274150                                                     |
| ADGRV1    | BIALLELIC                              | Usher syndrome, type 2C, MIM# 605472                                                                          |
| AGL       | BIALLELIC                              | Glycogen storage disease IIIa, MIM#232400                                                                     |
| AGRN      | BIALLELIC                              | Myasthenic syndrome, congenital, 8, with pre- and postsynaptic defects, MIM# 615120                           |
| AGXT      | BIALLELIC                              | Hyperoxaluria, primary, type 1, MIM# 259900, MONDO:0009823                                                    |
| AHCY      | BIALLELIC                              | Hypermethioninemia with deficiency of S-adenosylhomocysteine hydrolase, MIM#613752                            |
| AICDA     | BIALLELIC                              | Immunodeficiency with hyper-IgM, type 2, MIM#605258                                                           |
| AIRE      | BIALLELIC                              | Autoimmune polyendocrinopathy syndrome , type I, with or without reversible metaphyseal dysplasia, MIM#240300 |
| AK2       | BIALLELIC                              | Reticular dysgenesis, MIM# 267500;MONDO:0009973                                                               |
| AKR1D1    | BIALLELIC                              | Bile acid synthesis defect, congenital, 2                                                                     |
| ALDH4A1   | BIALLELIC                              | Hyperprolinemia, type II MIM#239510                                                                           |
| ALDH7A1   | BIALLELIC                              | Epilepsy, pyridoxine-dependent, MIM#266100                                                                    |
| ALDOB     | BIALLELIC                              | Fructose intolerance, hereditary, MIM# 229600                                                                 |
| ALPL      | BIALLELIC                              | Hypophosphatasia, childhood OMIM#241510;Hypophosphatasia, infantile OMIM#241500                               |
| AMACR     | BIALLELIC                              | Bile acid synthesis defect, congenital, 4, MIM# 214950                                                        |
| AMN       | BIALLELIC                              | Megaloblastic anemia-1, Norwegian type, MIM#618882                                                            |
| AP3B1     | BIALLELIC                              | Hermansky-Pudlak syndrome 2, MIM# 608233 MONDO:0011997                                                        |
| AQP2      | BOTH monoallelic and biallelic         | Diabetes insipidus, nephrogenic, 2, MIM#125800                                                                |
| ARG1      | BIALLELIC                              | Arginase deficiency, MIM#207800                                                                               |
| ARPC1B    | BIALLELIC                              | Immunodeficiency 71 with inflammatory disease and congenital thrombocytopenia, MIM#617718                     |
| ARSA      | BIALLELIC                              | Metachromatic leukodystrophy, MIM# 250100                                                                     |
| ARSB      | BIALLELIC                              | Mucopolysaccharidosis VI (MPS6, MIM# 253200                                                                   |
| ASL       | BIALLELIC                              | Argininosuccinic aciduria, MIM#207900                                                                         |
| ASS1      | BIALLELIC                              | Citrullinaemia, MIM#215700                                                                                    |
| ATP6V0A4  | BIALLELIC                              | Distal renal tubular acidosis 3, with or without sensorineural hearing loss, MIM3602722                       |
| ATP6V1B1  | BIALLELIC                              | Distal renal tubular acidosis 2 with progressive sensorineural hearing loss, MIM# 267300                      |
| ATP7A     | X-LINKED: hemizygous mutation in males | Menkes disease, MIM# 309400                                                                                   |
| ATP7B     | BIALLELIC                              | Wilson disease MIM#277900                                                                                     |
| AVP       | MONOALLELIC                            | Diabetes insipidus, neurohypophyseal MIM#125700                                                               |
| AVPR2     | X-LINKED: hemizygous mutation in males | Diabetes insipidus, nephrogenic, MIM#304800                                                                   |
| BCHE      | BIALLELIC                              | Butyrylcholinesterase deficiency, MIM#617936                                                                  |
| BCKDHA    | BIALLELIC                              | Maple syrup urine disease, type Ia, MIM# 248600                                                               |
| BCKDHB    | BIALLELIC                              | Maple syrup urine disease, type Ib, MIM# 248600                                                               |
| BCKDK     | BIALLELIC                              | Branched-chain keto acid dehydrogenase kinase deficiency, MIM#614923                                          |
| BLNK      | BIALLELIC                              | Agammaglobulinaemia 4, MIM#613502                                                                             |

|          |                                        |                                                                                                                                       |
|----------|----------------------------------------|---------------------------------------------------------------------------------------------------------------------------------------|
| BMP1     | BIALLELIC                              | Osteogenesis imperfecta, type XIII , MIM#614856                                                                                       |
| BRCA1    | BIALLELIC                              | Fanconi anemia, complementation group S, MIM# 617883                                                                                  |
| BRCA2    | BIALLELIC                              | Fanconi anaemia, complementation group D1, MIM# 605724                                                                                |
| BRIP1    | BIALLELIC                              | Fanconi anaemia, complementation group J, MIM#609054                                                                                  |
| BSCL2    | BIALLELIC                              | Lipodystrophy, congenital generalized, type 2, MIM# 269700;Berardinelli-Seip lipodystrophy                                            |
| BSND     | BIALLELIC                              | Bartter syndrome, type 4a, MIM# 602522                                                                                                |
| BTD      | BIALLELIC                              | Biotinidase deficiency, MIM#253260                                                                                                    |
| BTK      | X-LINKED: hemizygous mutation in males | Agammaglobulinemia, X-linked 1, MIM#300755                                                                                            |
| C17orf62 | BIALLELIC                              | Chronic granulomatous disease 5, autosomal recessive, MIM# 618935                                                                     |
| C2       | BIALLELIC                              | C2 deficiency, MIM#217000                                                                                                             |
| C3       | BIALLELIC                              | C3 deficiency, MIM#613779                                                                                                             |
| C5       | BIALLELIC                              | C5 deficiency, MIM#609536                                                                                                             |
| C6       | BIALLELIC                              | C6 deficiency, MIM#612446                                                                                                             |
| C7       | BIALLELIC                              | C7 deficiency, MIM#610102                                                                                                             |
| C8B      | BIALLELIC                              | C8 deficiency, type II, MIM#613789                                                                                                    |
| C9       | BIALLELIC                              | C9 deficiency, MIM#613825                                                                                                             |
| CA12     | BIALLELIC                              | Hyperchlorhidrosis, isolated MIM#143860                                                                                               |
| CA2      | BIALLELIC                              | Osteopetrosis, autosomal recessive 3, with renal tubular acidosis, MIM#259730                                                         |
| CA5A     | BIALLELIC                              | Hyperammonaemia due to carbonic anhydrase VA deficiency, MIM#615751                                                                   |
| CABP2    | BIALLELIC                              | Deafness, autosomal recessive 93, MIM# 614899                                                                                         |
| CACNA1S  | MONOALLELIC                            | Malignant hyperthermia susceptibility 5, MIM# 601887                                                                                  |
| CAD      | BIALLELIC                              | Developmental and epileptic encephalopathy 50, MIM#616457                                                                             |
| CALM3    | MONOALLELIC                            | Long QT syndrome 16, MIM#618782                                                                                                       |
| CARD11   | BOTH monoallelic and biallelic         | Immunodeficiency 11A, autosomal recessive, MIM# 615206;Immunodeficiency 11B with atopic dermatitis, autosomal dominant, MIM# 617638   |
| CASR     | BOTH monoallelic and biallelic         | Hypocalcemia, autosomal dominant MIM#601198;Hyperparathyroidism, neonatal MIM#239200                                                  |
| CAV1     | BIALLELIC                              | Lipodystrophy, congenital generalized, type 3, MIM#612526                                                                             |
| CAVIN1   | BIALLELIC                              | Lipodystrophy, congenital generalized, type 4, MIM# 613327                                                                            |
| CD19     | BIALLELIC                              | Immunodeficiency, common variable, 3, MIM#613493                                                                                      |
| CD247    | BIALLELIC                              | Immunodeficiency 25, MIM# 610163                                                                                                      |
| CD27     | BIALLELIC                              | CD27-deficiency MIM# 615122                                                                                                           |
| CD3D     | BIALLELIC                              | Immunodeficiency 19, MIM#615617                                                                                                       |
| CD3E     | BIALLELIC                              | Immunodeficiency 18, MIM#615615                                                                                                       |
| CD3G     | BIALLELIC                              | Immunodeficiency 17;CD3 gamma deficient MIM# 615607                                                                                   |
| CD40     | BIALLELIC                              | Immunodeficiency with hyper-IgM, type 3, MIM#606843                                                                                   |
| CD40LG   | X-LINKED: hemizygous mutation in males | Immunodeficiency, X-linked, with hyper-IgM MIM# 308230                                                                                |
| CD55     | BIALLELIC                              | Complement hyperactivation, angiopathic thrombosis, and protein-losing enteropathy, MIM# 226300                                       |
| CD70     | BIALLELIC                              | Lymphoproliferative syndrome 3, MIM# 618261                                                                                           |
| CD79A    | BIALLELIC                              | Agammaglobulinaemia 3, MIM#613501                                                                                                     |
| CD79B    | BIALLELIC                              | Agammaglobulinaemia 6, MIM#612692                                                                                                     |
| CDC14A   | BIALLELIC                              | Deafness, autosomal recessive 32, with or without immotile sperm, MIM# 608653                                                         |
| CDC47    | BIALLELIC                              | Immunodeficiency-centromeric instability-facial anomalies syndrome 3, MIM# 616910                                                     |
| CDC48    | BOTH monoallelic and biallelic         | Congenital hypothyroidism, MONDO:0018612, CDC48-related                                                                               |
| CDH23    | BIALLELIC                              | Usher syndrome, type 1D (MIM# 601067);Deafness, autosomal recessive 12 (MIM # 601386);Usher syndrome, type 1D/F digenic (MIM #601067) |
| CDKN1C   | MONOALLELIC, imprinted                 | IMAGe syndrome, MIM# 614732                                                                                                           |
| CEBPE    | BIALLELIC                              | Specific granule deficiency, MIM# 245480                                                                                              |
| CFD      | BIALLELIC                              | Complement factor D deficiency, MIM#613912                                                                                            |
| CFH      | BIALLELIC                              | Complement factor H deficiency, MIM# 609814                                                                                           |
| CFI      | BIALLELIC                              | Complement factor I deficiency MIM#610984                                                                                             |
| CFP      | X-LINKED: hemizygous mutation in males | Properdin deficiency, X-linked, MIM#312060                                                                                            |
| CFTR     | BIALLELIC                              | Cystic fibrosis, MIM#219700                                                                                                           |
| CHAT     | BIALLELIC                              | Congenital myasthenic syndrome, MIM#254210                                                                                            |

|         |                                        |                                                                                                                                                                                                                                                                                                    |
|---------|----------------------------------------|----------------------------------------------------------------------------------------------------------------------------------------------------------------------------------------------------------------------------------------------------------------------------------------------------|
| CHRNA1  | BIALLELIC                              | Myasthenic syndrome, congenital, 1A, slow-channel, MIM# 601462;Myasthenic syndrome, congenital, 1B, fast-channel , MIM#608930                                                                                                                                                                      |
| CHRNB1  | BIALLELIC                              | Myasthenic syndrome, congenital, 2C, associated with acetylcholine receptor deficiency, MIM# 616314;Congenital myasthenic syndrome                                                                                                                                                                 |
| CHRNA1  | BIALLELIC                              | Myasthenic syndrome, congenital, 3B, fast-channel, MIM#616322;Myasthenic syndrome, congenital, 3C, associated with acetylcholine receptor deficiency, MIM#616323;Myasthenic syndrome, congenital, 3A, slow-channel, MIM#616321;Multiple pterygium syndrome, lethal type, MIM# 253290;MONDO:0009668 |
| CHRND   | BIALLELIC                              | Myasthenic syndrome, congenital, 4B, fast-channel, 616324;Myasthenic syndrome, congenital, 4C, associated with acetylcholine receptor deficiency, 608931;Myasthenic syndrome, slow-channel congenital, 601462;Myasthenic syndrome, congenital, 4A, slow-channel, 605809                            |
| CHRNE   | BIALLELIC                              | Deafness, autosomal recessive 48, MIM# 609439                                                                                                                                                                                                                                                      |
| CIB2    | BIALLELIC                              | Bare Lymphocyte Syndrome, type II, complementation group A MIM# 209920                                                                                                                                                                                                                             |
| CIITA   | BIALLELIC                              | Osteopetrosis, autosomal recessive 4, MIM# 611490                                                                                                                                                                                                                                                  |
| CLCN7   | BIALLELIC                              | Deafness, autosomal recessive 29, MIM# 614035                                                                                                                                                                                                                                                      |
| CLDN14  | BIALLELIC                              | Perrault syndrome 3, MIM# 614129                                                                                                                                                                                                                                                                   |
| CLPP    | BIALLELIC                              | Deafness, autosomal recessive 110, MIM# 618094                                                                                                                                                                                                                                                     |
| COCH    | BIALLELIC                              | Stickler syndrome, type II, MIM# 604841                                                                                                                                                                                                                                                            |
| COL11A1 | MONOALLELIC                            | Deafness, autosomal recessive 53, MIM# 609706                                                                                                                                                                                                                                                      |
| COL11A2 | BIALLELIC                              | Myasthenic syndrome, congenital, 19, MIM#616720                                                                                                                                                                                                                                                    |
| COL13A1 | BIALLELIC                              | Osteogenesis imperfecta, type I, MIM#166200                                                                                                                                                                                                                                                        |
| COL1A1  | MONOALLELIC                            | Osteogenesis imperfecta, type II , MIM#166210                                                                                                                                                                                                                                                      |
| COL1A2  | MONOALLELIC                            | Stickler syndrome, type I, MIM# 108300                                                                                                                                                                                                                                                             |
| COL2A1  | MONOALLELIC                            | Alport syndrome 2, autosomal recessive, MIM# 203780                                                                                                                                                                                                                                                |
| COL4A3  | BIALLELIC                              | Alport syndrome 2, autosomal recessive MIM#203780                                                                                                                                                                                                                                                  |
| COL4A4  | BIALLELIC                              | Alport syndrome 1, X-linked, MIM# 301050                                                                                                                                                                                                                                                           |
| COL4A5  | X-LINKED: hemizygous mutation in males | Stickler syndrome, type IV, MIM#614134                                                                                                                                                                                                                                                             |
| COL9A1  | BIALLELIC                              | Stickler syndrome, type V, MIM# 614284                                                                                                                                                                                                                                                             |
| COL9A2  | BIALLELIC                              | Stickler syndrome, type VI, MIM# 620022                                                                                                                                                                                                                                                            |
| COL9A3  | BIALLELIC                              | Congenital myasthenic syndrome, MIM#603034                                                                                                                                                                                                                                                         |
| COLQ    | BIALLELIC                              | Coenzyme Q10 deficiency, primary, 1, MIM#607426                                                                                                                                                                                                                                                    |
| COQ2    | BIALLELIC                              | Coenzyme Q10 deficiency, primary, 7, MIM#616276                                                                                                                                                                                                                                                    |
| COQ4    | BIALLELIC                              | Coenzyme Q10 deficiency, primary, 6, MIM#614650                                                                                                                                                                                                                                                    |
| COQ6    | BIALLELIC                              | Coenzyme Q10 deficiency, primary, 4, MIM#612016                                                                                                                                                                                                                                                    |
| COQ8A   | BIALLELIC                              | Immunodeficiency 8 MIM# 615401                                                                                                                                                                                                                                                                     |
| CORO1A  | BIALLELIC                              | Carbamoylphosphate synthetase I deficiency, MIM#237300                                                                                                                                                                                                                                             |
| CPS1    | BIALLELIC                              | Carnitine palmitoyltransferase I deficiency, MIM#255120                                                                                                                                                                                                                                            |
| CPT1A   | BIALLELIC                              | CPT II deficiency, infantile 600649;CPT II deficiency, lethal neonatal 608836;CPT II deficiency, myopathic, stress-induced 255110                                                                                                                                                                  |
| CPT2    | BIALLELIC                              | Osteogenesis imperfecta, type VII, MIM# MIM#610682                                                                                                                                                                                                                                                 |
| CRTAP   | BIALLELIC                              | Neutropenia, severe congenital, 7, autosomal recessive, MIM#617014                                                                                                                                                                                                                                 |
| CSF3R   | BIALLELIC                              | Cystinosis, nephropathic MIM#219800                                                                                                                                                                                                                                                                |
| CTNS    | BIALLELIC                              | Immunodeficiency 24, MIM#615897                                                                                                                                                                                                                                                                    |
| CTPS1   | BIALLELIC                              | Megaloblastic anaemia-1, Finnish type, MIM#261100                                                                                                                                                                                                                                                  |
| CUBN    | BIALLELIC                              | Pseudohypoadosteronism, type IIE 614496                                                                                                                                                                                                                                                            |
| CUL3    | MONOALLELIC                            | WHIM syndrome 1, MIM#193670                                                                                                                                                                                                                                                                        |
| CXCR4   | MONOALLELIC                            | Orthostatic hypotension 2, MIM#618182                                                                                                                                                                                                                                                              |
| CYB561  | BIALLELIC                              | Chronic granulomatous disease, MIM#233690                                                                                                                                                                                                                                                          |
| CYBA    | BIALLELIC                              | Chronic granulomatous disease, MIM#306400                                                                                                                                                                                                                                                          |
| CYBB    | X-LINKED: hemizygous mutation in males | Adrenal insufficiency, congenital, with 46XY sex reversal, partial or complete, MIM#613743                                                                                                                                                                                                         |
| CYP11A1 | BIALLELIC                              | Adrenal hyperplasia, congenital, due to 11-beta-hydroxylase deficiency, MIM#202010                                                                                                                                                                                                                 |
| CYP11B1 | BIALLELIC                              | Hypoadosteronism, congenital, due to CMO I deficiency, MIM#203400;Hypoadosteronism, congenital, due to CMO II deficiency, MIM#610600                                                                                                                                                               |
| CYP11B2 | BIALLELIC                              | 17,20-lyase deficiency, isolated, MIM#202110                                                                                                                                                                                                                                                       |
| CYP17A1 | BIALLELIC                              | Adrenal hyperplasia, congenital, due to 21-hydroxylase deficiency, MIM#201910                                                                                                                                                                                                                      |
| CYP21A2 | BIALLELIC                              |                                                                                                                                                                                                                                                                                                    |

|         |                                        |                                                                                                                                                               |
|---------|----------------------------------------|---------------------------------------------------------------------------------------------------------------------------------------------------------------|
| CYP27A1 | BIALLELIC                              | Cerebrotendinous xanthomatosis, MIM# 213700                                                                                                                   |
| CYP27B1 | BIALLELIC                              | Vitamin D-dependent rickets, type I MIM#264700                                                                                                                |
| CYP2R1  | BIALLELIC                              | Rickets due to defect in vitamin D 25-hydroxylation deficiency MIM#600081                                                                                     |
| CYP7B1  | BIALLELIC                              | Bile acid synthesis defect, congenital, 3, MIM# 613812                                                                                                        |
| DBT     | BIALLELIC                              | Maple syrup urine disease, MIM#248600                                                                                                                         |
| DCLRE1C | BIALLELIC                              | Severe combined immunodeficiency, Athabaskan type MIM# 602450;Omenn syndrome, MIM# 603554                                                                     |
| DDC     | BIALLELIC                              | Aromatic L-amino acid decarboxylase deficiency, MIM#608643                                                                                                    |
| DFNB59  | BIALLELIC                              | Deafness, autosomal recessive 59, MIM# 610220                                                                                                                 |
| DGAT1   | BIALLELIC                              | Diarrhea 7, protein-losing enteropathy type , MIM#615863                                                                                                      |
| DHCR7   | BIALLELIC                              | Smith-Lemli-Opitz syndrome, MIM#270400                                                                                                                        |
| DHFR    | BIALLELIC                              | Megaloblastic anaemia due to dihydrofolate reductase deficiency, MIM# 613839                                                                                  |
| DICER1  | MONOALLELIC                            | DICER1 syndrome, MONDO:0017288                                                                                                                                |
| DLAT    | BIALLELIC                              | Pyruvate dehydrogenase E2 deficiency, MIM#245348                                                                                                              |
| DMP1    | BIALLELIC                              | Hypophosphatemic rickets MIM#241520                                                                                                                           |
| DNAJC12 | BIALLELIC                              | Hyperphenylalaninemia, mild, non-BH4-deficient, MIM#617384                                                                                                    |
| DNAJC21 | BIALLELIC                              | Bone marrow failure syndrome 3, MIM#617052                                                                                                                    |
| DNASE2  | BIALLELIC                              | Autoinflammatory-pancytopenia syndrome, MIM# 619858                                                                                                           |
| DNMT3B  | BIALLELIC                              | Immunodeficiency-centromeric instability-facial anomalies syndrome 1, MIM# 242860                                                                             |
| DOCK2   | BIALLELIC                              | Immunodeficiency 40 MIM# 616433                                                                                                                               |
| DOCK8   | BIALLELIC                              | Hyper-IgE syndrome, MIM#243700                                                                                                                                |
| DOK7    | BIALLELIC                              | Congenital myasthenic syndrome, MIM# 254300                                                                                                                   |
| DPAGT1  | BIALLELIC                              | Congenital disorder of glycosylation, type Ij, MIM# 608093;DPAGT1-CDG MONDO:0011964;Myasthenic syndrome, congenital, 13, with tubular aggregates, MIM# 614750 |
| DUOX2   | BIALLELIC                              | Thyroid dysmorphogenesis 6, MIM# 607200                                                                                                                       |
| DUOXA2  | BIALLELIC                              | Thyroid dysmorphogenesis 5, MIM# 274900                                                                                                                       |
| ECHS1   | BIALLELIC                              | Mitochondrial short-chain enoyl-CoA hydratase 1 deficiency MIM# 616277                                                                                        |
| EDN3    | BIALLELIC                              | Waardenburg syndrome, type 4B, MIM# 613265                                                                                                                    |
| EDNRB   | BOTH monoallelic and biallelic         | Waardenburg syndrome, type 4A, MIM# 277580                                                                                                                    |
| EFL1    | BIALLELIC                              | Shwachman-Diamond syndrome 2, MIM#617941                                                                                                                      |
| EIF2AK3 | BIALLELIC                              | Wolcott-Rallison syndrome, MIM#226980                                                                                                                         |
| ELANE   | MONOALLELIC                            | Neutropenia, congenital, MIM#202700                                                                                                                           |
| ENG     | MONOALLELIC                            | Telangiectasia, hereditary hemorrhagic, type 1 MIM#187300                                                                                                     |
| ENPP1   | BIALLELIC                              | Arterial calcification, generalized, of infancy, 1, MIM# 208000;Hypophosphatemic rickets, autosomal recessive, 2, MIM# 613312                                 |
| EPS8    | BIALLELIC                              | Autosomal recessive nonsyndromic hearing loss 102, MIM#600205, MONDO:0014428                                                                                  |
| ERCC4   | BIALLELIC                              | Fanconi anemia, complementation group Q, MIM# 615272                                                                                                          |
| ESPN    | BIALLELIC                              | Deafness, autosomal recessive 36, MIM# 609006                                                                                                                 |
| ESRRB   | BIALLELIC                              | Deafness, autosomal recessive 35, MIM#608565                                                                                                                  |
| ETFA    | BIALLELIC                              | Glutaric acidaemia IIA, MIM#231680                                                                                                                            |
| ETFB    | BIALLELIC                              | Glutaric acidemia IIB, MIM#231680                                                                                                                             |
| ETFDH   | BIALLELIC                              | Glutaric acidemia IIC, MIM#231680                                                                                                                             |
| ETHE1   | BIALLELIC                              | Ethylmalonic encephalopathy, MIM#602473                                                                                                                       |
| F10     | BIALLELIC                              | Factor X deficiency, MIM#227600                                                                                                                               |
| F13A1   | BIALLELIC                              | Factor XIIIa deficiency, MIM#613225                                                                                                                           |
| F13B    | BIALLELIC                              | Factor XIIIb deficiency, MIM#613235                                                                                                                           |
| F7      | BIALLELIC                              | Factor VII deficiency MIM# 227500                                                                                                                             |
| F9      | X-LINKED: hemizygous mutation in males | Haemophilia B, MIM#306900                                                                                                                                     |
| FAH     | BIALLELIC                              | Tyrosinaemia, type I, MIM#276700                                                                                                                              |
| FAM111A | MONOALLELIC                            | Kenny-Caffey syndrome, type 2, MIM# 127000                                                                                                                    |
| FANCA   | BIALLELIC                              | Fanconi anaemia, complementation group A, MIM# 227650;MONDO:0009215                                                                                           |
| FANCB   | X-LINKED: hemizygous mutation in males | Fanconi anaemia, complementation group B, MIM# 300514                                                                                                         |
| FANCC   | BIALLELIC                              | Fanconi anemia, complementation group C, MIM# 227645;MONDO:0009213                                                                                            |
| FANCD2  | BIALLELIC                              | Fanconi anaemia, complementation group D2, MIM# 227646;MONDO:0009214                                                                                          |
| FANCG   | BIALLELIC                              | Fanconi anaemia, MIM#614082                                                                                                                                   |

|        |                                        |                                                                                                                                                                                                   |
|--------|----------------------------------------|---------------------------------------------------------------------------------------------------------------------------------------------------------------------------------------------------|
| FANCI  | BIALLELIC                              | Fanconi anaemia, MIM#609053                                                                                                                                                                       |
| FBN1   | MONOALLELIC                            | Marfan syndrome, MIM# 154700                                                                                                                                                                      |
| FBP1   | BIALLELIC                              | Fructose-1,6-bisphosphatase deficiency MIM# 229700                                                                                                                                                |
| FCHO1  | BIALLELIC                              | Immunodeficiency 76, MIM# 619164                                                                                                                                                                  |
| FECH   | BIALLELIC                              | Protoporphyrin, erythropoietic, 1, MIM#177000                                                                                                                                                     |
| FERMT3 | BIALLELIC                              | Leukocyte adhesion deficiency, type III, MIM#612840                                                                                                                                               |
| FGA    | BIALLELIC                              | Afibrinogenemia, congenital (MIM#202400)                                                                                                                                                          |
| FGB    | BIALLELIC                              | Afibrinogenemia, congenital, MIM# 202400                                                                                                                                                          |
| FGF23  | BOTH monoallelic and biallelic         | autosomal dominant hypophosphatemic rickets MONDO:0008660;familial hyperphosphatemic tumoral calcinosis/hyperphosphatemic hyperostosis syndrome MONDO:0100251                                     |
| FGF3   | BIALLELIC                              | Deafness, congenital with inner ear agenesis, microtia, and microdontia, MIM# 610706                                                                                                              |
| FGFR3  | MONOALLELIC                            | Achondroplasia MONDO:0007037                                                                                                                                                                      |
| FGG    | BIALLELIC                              | Afibrinogenemia, congenital, MIM# 202400                                                                                                                                                          |
| FH     | BIALLELIC                              | Fumurate deficiency MIM# 606812                                                                                                                                                                   |
| FKBP10 | BIALLELIC                              | Osteogenesis imperfecta, type XI, OMIM:610968                                                                                                                                                     |
| FLAD1  | BIALLELIC                              | Lipid storage myopathy due to flavin adenine dinucleotide synthetase deficiency, MIM#255100                                                                                                       |
| FOLR1  | BIALLELIC                              | Neurodegeneration due to cerebral folate transport deficiency, MIM# 613068                                                                                                                        |
| FOXA2  | MONOALLELIC                            | Hyperinsulinism MONDO:0002177                                                                                                                                                                     |
| FOXE1  | BIALLELIC                              | Bamforth-Lazarus syndrome MIM# 241850                                                                                                                                                             |
| FOXN1  | BOTH monoallelic and biallelic         | T-cell immunodeficiency, congenital alopecia, and nail dystrophy, autosomal recessive MIM# 601705;T-cell lymphopenia, infantile, with or without nail dystrophy, autosomal dominant, MIM#t 618806 |
| FOXP3  | X-LINKED: hemizygous mutation in males | IPEX syndrome, MIM#304790                                                                                                                                                                         |
| FUCA1  | BIALLELIC                              | Fucosidosis, MIM# 230000                                                                                                                                                                          |
| G6PC   | BIALLELIC                              | Glycogen storage disease Ia, MIM#232200                                                                                                                                                           |
| G6PC3  | BIALLELIC                              | Neutropenia, congenital, MIM#612541                                                                                                                                                               |
| G6PD   | X-LINKED: hemizygous mutation in males | Glucose-6-phosphate dehydrogenase deficiency, MIM#300908                                                                                                                                          |
| GAA    | BIALLELIC                              | Glycogen storage disease II, Pompe disease, MIM# 232300                                                                                                                                           |
| GALC   | BIALLELIC                              | Krabbe disease, MIM#245200                                                                                                                                                                        |
| GALE   | BIALLELIC                              | Galactose epimerase deficiency, MIM#230350                                                                                                                                                        |
| GALK1  | BIALLELIC                              | Galactokinase deficiency with cataracts, MIM#230200                                                                                                                                               |
| GALM   | BIALLELIC                              | Galactosemia IV MIM#618881                                                                                                                                                                        |
| GALNS  | BIALLELIC                              | Mucopolysaccharidosis IVA, MIM#253000                                                                                                                                                             |
| GALNT3 | BIALLELIC                              | Tumoral calcinosis, hyperphosphatemic, familial, 1, MIM# 211900                                                                                                                                   |
| GALT   | BIALLELIC                              | Galactosaemia, MIM#230400                                                                                                                                                                         |
| GAMT   | BIALLELIC                              | Cerebral creatine deficiency syndrome 2, MIM#612736                                                                                                                                               |
| GATA2  | MONOALLELIC                            | Immunodeficiency 21 MIM# 614172;Emberger syndrome MIM# 614038                                                                                                                                     |
| GATA3  | MONOALLELIC                            | Hypoparathyroidism, sensorineural deafness, and renal dysplasia, MIM# 146255                                                                                                                      |
| GATA4  | MONOALLELIC                            | Neonatal diabetes mellitus, MONDO:0016391, GATA4-related                                                                                                                                          |
| GATM   | BIALLELIC                              | Cerebral creatine deficiency syndrome 3 MIM#612718                                                                                                                                                |
| GBA    | BIALLELIC                              | Gaucher disease type 1, MIM#230800                                                                                                                                                                |
| GCDH   | BIALLELIC                              | Glutaric aciduria, type I, MIM#231670                                                                                                                                                             |
| GCH1   | BOTH monoallelic and biallelic         | Hyperphenylalaninemia, BH4-deficient, B, MIM# 233910;Dystonia, DOPA-responsive, with or without hyperphenylalaninemia, MIM# 128230                                                                |
| GCK    | BOTH monoallelic and biallelic         | Hyperinsulinemic hypoglycemia, familial, MIM#602485                                                                                                                                               |
| GCM2   | BOTH monoallelic and biallelic         | Hyperparathyroidism 4, OMIM #617343;Hypoparathyroidism, familial isolated 2, OMIM #618883                                                                                                         |
| GFI1   | MONOALLELIC                            | Neutropenia, severe congenital 2, autosomal dominant, MIM# 613107                                                                                                                                 |
| GGCX   | BIALLELIC                              | Vitamin K-dependent clotting factors, combined deficiency of, 1 MIM# 277450                                                                                                                       |
| GH1    | BOTH monoallelic and biallelic         | Growth hormone deficiency, isolated, type IA, MIM# 262400;Growth hormone deficiency, isolated, type II, MIM# 173100;Kowarski syndrome, MIM# 262650                                                |
| GHR    | BOTH monoallelic and biallelic         | Growth hormone insensitivity, partial, MIM# 604271;Laron dwarfism, MIM# 262500                                                                                                                    |
| GHRHR  | BIALLELIC                              | Growth hormone deficiency, isolated, type IV, MIM# 618157                                                                                                                                         |
| GIF    | BIALLELIC                              | Intrinsic factor deficiency, MIM#261000                                                                                                                                                           |

|         |                                        |                                                                                                        |
|---------|----------------------------------------|--------------------------------------------------------------------------------------------------------|
| GIPC3   | BIALLELIC                              | Deafness, autosomal recessive 15, MIM# 601869                                                          |
| GJB2    | BIALLELIC                              | Deafness, autosomal recessive 1A, MIM# 220290                                                          |
| GLA     | X-LINKED: hemizygous mutation in males | Fabry disease (MIM# 301500)                                                                            |
| GLIS3   | BIALLELIC                              | Diabetes mellitus, neonatal, with congenital hypothyroidism MIM#610199                                 |
| GLRA1   | BOTH monoallelic and biallelic         | Hyperreflexia, hereditary 1, autosomal dominant or recessive, MIM#149400                               |
| GLUD1   | MONOALLELIC                            | Hyperinsulinism, MIM#606762                                                                            |
| GNAS    | MONOALLELIC                            | Pseudopseudohypoparathyroidism MIM#612463;Pseudohypoparathyroidism MIM#612462, MIM#603233, MIM#103580  |
| GOT2    | BIALLELIC                              | Developmental and epileptic encephalopathy 82, MIM#618721                                              |
| GPIHBP1 | BIALLELIC                              | Hyperlipoproteinemia, type 1D MIM#615947;familial chylomicronemia syndrome                             |
| GREB1L  | MONOALLELIC                            | Deafness, autosomal dominant 80MIM#619274                                                              |
| GRHPR   | BIALLELIC                              | Hyperoxaluria, primary, type II, MIM# 260000                                                           |
| GRXCR1  | BIALLELIC                              | Deafness, autosomal recessive 25, MIM#613285                                                           |
| GUSB    | BIALLELIC                              | Mucopolysaccharidosis VII, MIM#253220                                                                  |
| GSY2    | BIALLELIC                              | Glycogen storage disease 0, liver (MIM#240600)                                                         |
| HADH    | BIALLELIC                              | 3-hydroxyacyl-CoA dehydrogenase deficiency, MIM# 231530                                                |
| HADHA   | BIALLELIC                              | Mitochondrial trifunctional protein deficiency, MIM#609015;LCHAD deficiency, MIM#609016                |
| HADHB   | BIALLELIC                              | Mitochondrial trifunctional protein deficiency, MIM#609015                                             |
| HAX1    | BIALLELIC                              | Neutropenia, severe congenital 3, autosomal recessive, MIM# 610738;Kostmann syndrome MONDO:0012548     |
| HBB     | BIALLELIC                              | Sickle cell anaemia, MIM# 603903                                                                       |
| HELLS   | BIALLELIC                              | Immunodeficiency-centromeric instability-facial anomalies syndrome 4, MIM# 616911                      |
| HESX1   | BOTH monoallelic and biallelic         | Pituitary hormone deficiency, combined, 5, MIM# 182230                                                 |
| HGF     | BIALLELIC                              | Deafness, autosomal recessive 39, MIM# 608265                                                          |
| HIBCH   | BIALLELIC                              | 3-hydroxyisobutryl-CoA hydrolase deficiency MIM#250620                                                 |
| HK1     | MONOALLELIC                            | Hyperinsulinism MONDO:0002177, HK1-related                                                             |
| HLCS    | BIALLELIC                              | Holocarboxylase synthetase deficiency, MIM#253270                                                      |
| HMGCL   | BIALLELIC                              | 3-hydroxy-3-methylglutaric aciduria, MIM#246450                                                        |
| HOGA1   | BIALLELIC                              | Hyperoxaluria, primary, type III MIM#613616                                                            |
| HSD11B2 | BIALLELIC                              | Apparent mineralocorticoid excess, MIM# 218030;MONDO:0009025                                           |
| HSD3B2  | BIALLELIC                              | Adrenal hyperplasia, congenital, due to 3-beta-hydroxysteroid dehydrogenase 2 deficiency MIM# 201810   |
| HSD3B7  | BIALLELIC                              | Bile acid synthesis defect, congenital, 1 MIM#607765                                                   |
| ICOS    | BIALLELIC                              | Immunodeficiency, common variable, 1 MIM# 607594                                                       |
| IDS     | X-LINKED: hemizygous mutation in males | Mucopolysaccharidosis II (MPS2, Hunter syndrome) 309900                                                |
| IDUA    | BIALLELIC                              | Mucopolysaccharidosis type 1, MONDO:0001586                                                            |
| IFITM5  | MONOALLELIC                            | Osteogenesis imperfecta, type V MIM#610967                                                             |
| IGF1    | BIALLELIC                              | Insulin-like growth factor I deficiency, MIM# 608747                                                   |
| IGHM    | BIALLELIC                              | Agammaglobulinaemia 1, MIM#601495                                                                      |
| IGLL1   | BIALLELIC                              | Agammaglobulinaemia 2, MIM#613500                                                                      |
| IGSF1   | X-LINKED: hemizygous mutation in males | Hypothyroidism, central, and testicular enlargement, MIM# 300888                                       |
| IKBK1   | BIALLELIC                              | Immunodeficiency 15B, MIM#615592                                                                       |
| IKZF1   | MONOALLELIC                            | Immunodeficiency, common variable, 13 MIM# 616873                                                      |
| IL10    | BIALLELIC                              | Autoinflammatory syndrome, MONDO:0019751, IL10-related                                                 |
| IL10RA  | BIALLELIC                              | Inflammatory bowel disease 28, early onset, autosomal recessive, MIM# 613148                           |
| IL10RB  | BIALLELIC                              | Inflammatory bowel disease 25, early onset, autosomal recessive, MIM#612567                            |
| IL1RN   | BIALLELIC                              | Interleukin 1 receptor antagonist deficiency, MIM# 612852                                              |
| IL21R   | BIALLELIC                              | Immunodeficiency 56, MIM# 615207                                                                       |
| IL2RA   | BIALLELIC                              | Immunodeficiency 41 with lymphoproliferation and autoimmunity, MIM# 606367                             |
| IL2RB   | BIALLELIC                              | Immunodeficiency 63 with lymphoproliferation and autoimmunity, MIM#618495                              |
| IL2RG   | X-LINKED: hemizygous mutation in males | Severe combined immunodeficiency, X-linked, MIM#312863                                                 |
| IL36RN  | BIALLELIC                              | Psoriasis 14, pustular, MIM# 614204                                                                    |
| IL7R    | BIALLELIC                              | Severe combined immunodeficiency, T-cell negative, B-cell/natural killer cell-positive type MIM#608971 |

|          |                                        |                                                                                                                                                                            |
|----------|----------------------------------------|----------------------------------------------------------------------------------------------------------------------------------------------------------------------------|
| ILDR1    | BIALLELIC                              | Deafness, autosomal recessive 42, MIM# 609646                                                                                                                              |
| INS      | BOTH monoallelic and biallelic         | Diabetes mellitus, insulin-dependent, 2, MIM# 125852;Diabetes mellitus, permanent neonatal 4, MIM# 618858;Maturity-onset diabetes of the young, type 10, MIM# 613370       |
| IRAK4    | BIALLELIC                              | Immunodeficiency 67, MIM#607676                                                                                                                                            |
| IRF8     | BIALLELIC                              | Immunodeficiency 32B, monocyte and dendritic cell deficiency, autosomal recessive, MIM# 226990                                                                             |
| IRS4     | X-LINKED: hemizygous mutation in males | Hypothyroidism, congenital, nongoitrous, 9, MIM# 301035                                                                                                                    |
| ITGA2B   | BIALLELIC                              | Glanzmann thrombasthaenia 1, MIM# 273800                                                                                                                                   |
| ITGB2    | BIALLELIC                              | Leukocyte adhesion deficiency, MIM#116920                                                                                                                                  |
| ITGB3    | BIALLELIC                              | Glanzmann thrombasthenia 2, MIM#619267                                                                                                                                     |
| ITK      | BIALLELIC                              | Lymphoproliferative syndrome 1, MIM#613011                                                                                                                                 |
| IVD      | BIALLELIC                              | Isovaleric acidemia, MIM#243500                                                                                                                                            |
| IYD      | BIALLELIC                              | Thyroid dysmorphogenesis 4, MIM# 274800                                                                                                                                    |
| JAGN1    | BIALLELIC                              | Neutropenia, severe congenital, 6, autosomal recessive, MIM# 616022                                                                                                        |
| JAK3     | BIALLELIC                              | SCID, autosomal recessive, T-negative/B-positive type, MIM#600802                                                                                                          |
| KCNH2    | MONOALLELIC                            | Long QT syndrome 2, MIM# 613688                                                                                                                                            |
| KCNJ1    | BIALLELIC                              | Bartter syndrome, type 2, 241200                                                                                                                                           |
| KCNJ11   | BOTH monoallelic and biallelic         | Diabetes mellitus, transient neonatal, 3 610582;Diabetes, permanent neonatal, with or without neurologic features 606176;Hyperinsulinemic hypoglycemia, familial, 2 601820 |
| KCNJ2    | MONOALLELIC                            | Andersen syndrome MIM#170390                                                                                                                                               |
| KCNQ1    | BOTH monoallelic and biallelic         | Jervell and Lange-Nielsen syndrome MIM#220400;Long QT syndrome 1, MIM# 192500                                                                                              |
| KDELR2   | BIALLELIC                              | Osteogenesis imperfecta 21, MIM# 619131                                                                                                                                    |
| KLHL3    | BOTH monoallelic and biallelic         | Pseudohypoadosteronism, type IID, MIM# 614495                                                                                                                              |
| LAMA2    | BIALLELIC                              | Muscular dystrophy, congenital, merosin deficient or partially deficient, MIM# 607855                                                                                      |
| LAT      | BIALLELIC                              | Immunodeficiency 52, MIM# 617514                                                                                                                                           |
| LDLR     | BIALLELIC                              | Hypercholesterolemia, familial, 1, MIM# 143890                                                                                                                             |
| LEP      | BIALLELIC                              | Obesity, morbid, due to leptin deficiency (MIM#614962)                                                                                                                     |
| LEPR     | BIALLELIC                              | Obesity, morbid, due to leptin receptor deficiency (MIM#614963)                                                                                                            |
| LHFPL5   | BIALLELIC                              | Deafness, autosomal recessive 67, MIM# 610265                                                                                                                              |
| LHX3     | BIALLELIC                              | Pituitary hormone deficiency, combined, MIM#221750                                                                                                                         |
| LHX4     | MONOALLELIC                            | Pituitary hormone deficiency, combined, 4, MIM#262700                                                                                                                      |
| LIG1     | BIALLELIC                              | Immunodeficiency 96, MIM#619774                                                                                                                                            |
| LIG4     | BIALLELIC                              | LIG4 syndrome, MIM# 606593                                                                                                                                                 |
| LIPA     | BIALLELIC                              | Wolman syndrome, MIM#278000                                                                                                                                                |
| LMBRD1   | BIALLELIC                              | Methylmalonic aciduria and homocystinuria, MIM#277380                                                                                                                      |
| LOXHD1   | BIALLELIC                              | Deafness, autosomal recessive 77, MIM# 613079                                                                                                                              |
| LPL      | BIALLELIC                              | Lipoprotein lipase deficiency, MIM# 238600                                                                                                                                 |
| LRBA     | BIALLELIC                              | Immunodeficiency, common variable, 8, with autoimmunity MIM# 614700                                                                                                        |
| LRP5     | BIALLELIC                              | Osteoporosis-pseudoglioma syndrome, MIM# 259770                                                                                                                            |
| LRTOMT   | BIALLELIC                              | Deafness, autosomal recessive 63, MIM# 611451                                                                                                                              |
| LYST     | BIALLELIC                              | Chediak-Higashi syndrome, MIM#214500                                                                                                                                       |
| MAFB     | MONOALLELIC                            | Multicentric carpotarsal osteolysis syndrome (MIM#166300)                                                                                                                  |
| MAGT1    | X-LINKED: hemizygous mutation in males | Immunodeficiency, X-linked, with magnesium defect, Epstein-Barr virus infection and neoplasia (MIM# 300853)                                                                |
| MALT1    | BIALLELIC                              | Immunodeficiency 12 MIM# 615468                                                                                                                                            |
| MAN2B1   | BIALLELIC                              | Mannosidosis, alpha-, types I and II, MIM# 248500                                                                                                                          |
| MARVELD2 | BIALLELIC                              | Deafness, autosomal recessive 49, MIM# 610153                                                                                                                              |
| MC2R     | BIALLELIC                              | Glucocorticoid deficiency, due to ACTH unresponsiveness, MIM#202200                                                                                                        |
| MCEE     | BIALLELIC                              | Methylmalonyl-CoA epimerase deficiency MIM#251120                                                                                                                          |
| MEFV     | BIALLELIC                              | Familial Mediterranean fever MIM# 249100                                                                                                                                   |
| MESD     | BIALLELIC                              | Osteogenesis imperfecta, type XX, MIM#618644                                                                                                                               |
| MITF     | BOTH monoallelic and biallelic         | Waardenburg syndrome, type 2A, MIM# 193510;Deafness                                                                                                                        |
| MLH1     | BIALLELIC                              | Mismatch repair cancer syndrome 1, MIM# 276300                                                                                                                             |
| MLYCD    | BIALLELIC                              | Malonyl-CoA decarboxylase deficiency, MIM# 248360                                                                                                                          |
| MMAA     | BIALLELIC                              | Methylmalonic aciduria, vitamin B12-responsive, MIM#251100                                                                                                                 |
| MMAB     | BIALLELIC                              | Methylmalonic aciduria, vitamin B12-responsive, due to defect in synthesis of adenosylcobalamin, cblB complementation type, MIM#251110                                     |

|         |                                        |                                                                                                                           |
|---------|----------------------------------------|---------------------------------------------------------------------------------------------------------------------------|
| MMACHC  | BIALLELIC                              | Methylmalonic aciduria and homocystinuria, cblC type, MIM#277400                                                          |
| MMADHC  | BIALLELIC                              | Methylmalonic aciduria and homocystinuria, cblD type, MIM#277410                                                          |
| MNX1    | BIALLELIC                              | Permanent neonatal diabetes mellitus, MONDO:0100164, MNX1-related                                                         |
| MOCS1   | BIALLELIC                              | Molybdenum cofactor deficiency, MIM#252150                                                                                |
| MPI     | BIALLELIC                              | Congenital disorder of glycosylation, type Ib, MIM# 602579                                                                |
| MPL     | BIALLELIC                              | Thrombocytopenia, congenital amegakaryocytic, MIM# 604498                                                                 |
| MRAP    | BIALLELIC                              | Glucocorticoid deficiency 2, MIM#607398                                                                                   |
| MSH2    | BIALLELIC                              | Mismatch repair cancer syndrome 2, MIM# 619096                                                                            |
| MSH6    | BIALLELIC                              | Mismatch repair cancer syndrome 3, MIM# 619097                                                                            |
| MTHFD1  | BIALLELIC                              | Combined immunodeficiency and megaloblastic anemia with or without hyperhomocysteinaemia MIM # 617780                     |
| MTR     | BIALLELIC                              | Homocystinuria-megaloblastic anaemia, cblG complementation type, MIM# 250940                                              |
| MT-RNR1 | MITOCHONDRIAL                          | Aminoglycoside sensitivity                                                                                                |
| MTRR    | BIALLELIC                              | Methylmalonic aciduria and homocystinuria, MIM#236270                                                                     |
| MTPP    | BIALLELIC                              | Abetalipoproteinemia, MIM# 200100                                                                                         |
| MUSK    | BIALLELIC                              | Congenital myasthenic syndrome, MIM#616325                                                                                |
| MUT     | BIALLELIC                              | Methylmalonic aciduria, mut(0) type, MIM#251000                                                                           |
| MVK     | BIALLELIC                              | Mevalonic aciduria, MIM# 610377                                                                                           |
| MYD88   | BIALLELIC                              | Immunodeficiency 68, MIM# 612260                                                                                          |
| MYH7    | BIALLELIC                              | Cardiomyopathy, hypertrophic, 1, MIM# 192600                                                                              |
| MYO15A  | BIALLELIC                              | Deafness, autosomal recessive 3, MIM# 600316                                                                              |
| MYO3A   | BIALLELIC                              | Deafness, autosomal recessive 30, MIM:607101                                                                              |
| MYO6    | BIALLELIC                              | Deafness, autosomal recessive 37, MIM# 607821                                                                             |
| MYO7A   | BIALLELIC                              | Deafness, autosomal recessive 2, 600060;Usher syndrome, type 1B, MIM# 276900                                              |
| MYSM1   | BIALLELIC                              | Bone marrow failure syndrome 4, MIM#618116                                                                                |
| NAGLU   | BIALLELIC                              | Mucopolysaccharidosis type IIIB (Sanfilippo B), MIM# 252920                                                               |
| NAGS    | BIALLELIC                              | N-acetylglutamate synthetase deficiency, MIM#237310                                                                       |
| NCF2    | BIALLELIC                              | Chronic granulomatous disease, MIM#233710                                                                                 |
| NCF4    | BIALLELIC                              | Granulomatous disease, chronic, autosomal recessive, cytochrome b-positive, type III MIM#613960                           |
| NEUROG3 | BIALLELIC                              | Diarrhoea 4, malabsorptive, congenital, MIM# 610370                                                                       |
| NFKBIA  | MONOALLELIC                            | Ectodermal dysplasia and immunodeficiency 2 MIM# 612132                                                                   |
| NHEJ1   | BIALLELIC                              | Severe combined immunodeficiency with microcephaly, growth retardation, and sensitivity to ionizing radiation, MIM#611291 |
| NIPAL4  | BIALLELIC                              | Ichthyosis, congenital, autosomal recessive 6, MIM# 612281                                                                |
| NKX2-1  | MONOALLELIC                            | Choreoathetosis, hypothyroidism, and neonatal respiratory distress MIM#610978                                             |
| NKX2-5  | MONOALLELIC                            | Atrial septal defect 7, with or without AV conduction defects, MIM#108900                                                 |
| NNT     | BIALLELIC                              | Glucocorticoid deficiency 4, with or without mineralocorticoid deficiency, MIM#614736                                     |
| NPC1    | BIALLELIC                              | Niemann-Pick disease type C1, MIM#257220                                                                                  |
| NPC2    | BIALLELIC                              | Niemann-Pick disease type C2, MIM#607625                                                                                  |
| NROB1   | X-LINKED: hemizygous mutation in males | Adrenal hypoplasia, congenital (MIM# 300200)                                                                              |
| NR3C2   | MONOALLELIC                            | Pseudohypoadosteronism type I, autosomal dominant, MIM#177735                                                             |
| NR5A1   | MONOALLELIC                            | Adrenocortical insufficiency, (MIM#612964)                                                                                |
| OAS1    | MONOALLELIC                            | Immunodeficiency 100 with pulmonary alveolar proteinosis and hypogammaglobulinaemia, MIM#618042                           |
| OAT     | BIALLELIC                              | Gyrate atrophy of choroid and retina with or without ornithinemia MIM#258870                                              |
| ORAI1   | BIALLELIC                              | Immunodeficiency 9, MIM# 612782                                                                                           |
| OTC     | X-LINKED: hemizygous mutation in males | Ornithine transcarbamylase deficiency, MIM#311250                                                                         |
| OTOA    | BIALLELIC                              | Deafness, autosomal recessive 22, MIM#607039                                                                              |
| OTOF    | BIALLELIC                              | Deafness, autosomal recessive 9, MIM#601071                                                                               |
| OTOG    | BIALLELIC                              | Deafness, autosomal recessive 18B - MIM#614945                                                                            |
| OTOGL   | BIALLELIC                              | Deafness, autosomal recessive 84B, MIM# 614944                                                                            |
| OTULIN  | BIALLELIC                              | Autoinflammation, panniculitis, and dermatosis syndrome, MIM# 617099                                                      |
| OTX2    | MONOALLELIC                            | Pituitary hormone deficiency, combined, 6, MIM# 613986                                                                    |
| OXCT1   | BIALLELIC                              | Succinyl CoA:3-oxoacid CoA transferase deficiency, MIM#245050                                                             |
| P3H1    | BIALLELIC                              | Osteogenesis imperfecta, type VIII, (MIM# 610915)                                                                         |

|         |                                        |                                                                                                                                                                        |
|---------|----------------------------------------|------------------------------------------------------------------------------------------------------------------------------------------------------------------------|
| PAH     | BIALLELIC                              | Phenylketonuria, MIM#261600                                                                                                                                            |
| PALB2   | BIALLELIC                              | Fanconi anemia, complementation group N, MIM# 610832                                                                                                                   |
| PAX3    | MONOALLELIC                            | Waardenburg syndrome, type 1, OMIM 193500                                                                                                                              |
| PAX8    | MONOALLELIC                            | Hypothyroidism, congenital, due to thyroid dysgenesis or hypoplasia, MIM#218700                                                                                        |
| PC      | BIALLELIC                              | Pyruvate carboxylase deficiency, MIM# 266150                                                                                                                           |
| PCBD1   | BIALLELIC                              | Hyperphenylalaninemia, BH4-deficient, D, MIM#264070                                                                                                                    |
| PCCA    | BIALLELIC                              | Propionic acidaemia, MIM#606054                                                                                                                                        |
| PCCB    | BIALLELIC                              | Propionicacidaemia, MIM#606054                                                                                                                                         |
| PCDH15  | BIALLELIC                              | Usher syndrome, type 1F 602083, Deafness, autosomal recessive 23 609533                                                                                                |
| PCSK9   | MONOALLELIC                            | Hypercholesterolaemia, familial, 3, MIM# 603776                                                                                                                        |
| PDHA1   | X-LINKED: hemizygous mutation in males | Pyruvate dehydrogenase E1-alpha deficiency, MIM# 312170                                                                                                                |
| PDHB    | BIALLELIC                              | Pyruvate dehydrogenase E1-beta deficiency, MIM#614111                                                                                                                  |
| PDHX    | BIALLELIC                              | Lactic acidaemia due to PDX1 deficiency, MIM# 245349                                                                                                                   |
| PDP1    | BIALLELIC                              | Pyruvate dehydrogenase phosphatase deficiency, MIM# 608782                                                                                                             |
| PDX1    | BIALLELIC                              | Pancreatic agenesis, MIM# # 260370                                                                                                                                     |
| PDZD7   | BIALLELIC                              | Deafness, autosomal recessive 57, MIM# 618003;Usher syndrome, type IIC, GPR98/PDZD7 digenic, MIM# 605472                                                               |
| PGM1    | BIALLELIC                              | Congenital disorder of glycosylation, type It, MIM#614921                                                                                                              |
| PGM3    | BIALLELIC                              | Immunodeficiency 23, MIM#615816                                                                                                                                        |
| PHEX    | X-LINKED: hemizygous mutation in males | Hypophosphatemic rickets, X-linked dominant, MIM#307800                                                                                                                |
| PHGDH   | BIALLELIC                              | Phosphoglycerate dehydrogenase deficiency, MIM#601815                                                                                                                  |
| PHKA2   | X-LINKED: hemizygous mutation in males | Glycogen storage disease, type IXa1 and a2, MIM# 306000                                                                                                                |
| PHKB    | BIALLELIC                              | Phosphorylase kinase deficiency of liver and muscle, autosomal recessive 261750;Glycogen storage disease IXb, MONDO:0009868                                            |
| PHKG2   | BIALLELIC                              | Glycogen storage disease IXc, MIM# 613027                                                                                                                              |
| PIK3CD  | BOTH monoallelic and biallelic         | Immunodeficiency 14B, autosomal recessive, MIM# 619281;Immunodeficiency 14A, autosomal dominant, MIM# 615513                                                           |
| PIK3R1  | BOTH monoallelic and biallelic         | Agammaglobulinemia 7, autosomal recessive, MIM# 615214;Immunodeficiency 36, MIM#616005                                                                                 |
| PKLR    | BIALLELIC                              | Pyruvate kinase deficiency, MIM#266200                                                                                                                                 |
| PLG     | BIALLELIC                              | Plasminogen deficiency, type I, MIM# 217090                                                                                                                            |
| PLPBP   | BIALLELIC                              | Epilepsy, early-onset, vitamin B6-dependent, MIM#617290                                                                                                                |
| PLS3    | X-LINKED: hemizygous mutation in males | Bone mineral density QTL18, osteoporosis - MIM#300910                                                                                                                  |
| PNP     | BIALLELIC                              | Immunodeficiency due to purine nucleoside phosphorylase deficiency MIM#613179                                                                                          |
| PNPO    | BIALLELIC                              | Pyridoxamine 5'-phosphate oxidase deficiency, MIM# 610090                                                                                                              |
| POLE    | BIALLELIC                              | IMAGE-I syndrome, MIM#618336                                                                                                                                           |
| POMC    | BIALLELIC                              | Obesity, adrenal insufficiency, and red hair due to POMC deficiency MIM#609734                                                                                         |
| POR     | BIALLELIC                              | Antley-Bixler syndrome with genital anomalies and disordered steroidogenesis, MIM#201750;Disordered steroidogenesis due to cytochrome P450 oxidoreductase, MIM# 613571 |
| POU1F1  | BOTH monoallelic and biallelic         | Pituitary hormone deficiency, combined, 1 MIM# 613038                                                                                                                  |
| POU3F4  | X-LINKED: hemizygous mutation in males | Deafness, X-linked 2, MIM#304400                                                                                                                                       |
| PPOX    | BIALLELIC                              | Variagate porphyria, childhood-onset, MIM# 620483                                                                                                                      |
| PRDX1   | Other                                  | Methylmalonic aciduria and homocystinuria, cblC type, digenic MIM#277400                                                                                               |
| PRF1    | BIALLELIC                              | Haemophagocytic lymphohistiocytosis, familial, 2, MIM#603553                                                                                                           |
| PRKAR1A | MONOALLELIC                            | Carney complex, type 1, MIM# 160980                                                                                                                                    |
| PRKDC   | BIALLELIC                              | Immunodeficiency 26, with or without neurologic abnormalities, MIM#615966                                                                                              |
| PROP1   | BIALLELIC                              | Pituitary hormone deficiency, combined, 2, MIM#262600                                                                                                                  |
| PSTPIP1 | MONOALLELIC                            | Pyogenic sterile arthritis, pyoderma gangrenosum, and acne, MIM# 604416                                                                                                |
| PTCH1   | MONOALLELIC                            | Basal cell nevus syndrome, MIM# 109400                                                                                                                                 |
| PTF1A   | BIALLELIC                              | Pancreatic and cerebellar agenesis, MIM#609069;Pancreatic agenesis 2, MIM#615935                                                                                       |
| PTPRC   | BIALLELIC                              | Severe combined immunodeficiency, T cell-negative, B-cell/natural killer-cell positive MIM# 608971                                                                     |
| PTPRQ   | BOTH monoallelic and biallelic         | Deafness, autosomal recessive 84A, MIM# 613391;Deafness, autosomal dominant 73, MIM# 617663                                                                            |
| PTS     | BIALLELIC                              | Hyperphenylalaninemia, BH4-deficient, A, MIM#261640                                                                                                                    |
| PYGL    | BIALLELIC                              | Glycogen storage disease VI, MIM# 232700                                                                                                                               |

|          |                                        |                                                                                                                                                                                                                                                                                                   |
|----------|----------------------------------------|---------------------------------------------------------------------------------------------------------------------------------------------------------------------------------------------------------------------------------------------------------------------------------------------------|
| QDPR     | BIALLELIC                              | Dihydropteridine reductase deficiency, MIM#261630                                                                                                                                                                                                                                                 |
| RAB27A   | BIALLELIC                              | Griscelli syndrome, MIM#607624                                                                                                                                                                                                                                                                    |
| RAC2     | MONOALLELIC                            | Immunodeficiency 73B with defective neutrophil chemotaxis and lymphopenia MIM# 618986                                                                                                                                                                                                             |
| RAG1     | BIALLELIC                              | Alpha/beta T-cell lymphopenia with gamma/delta T-cell expansion, severe cytomegalovirus infection, and autoimmunity MIM# 609889;Combined cellular and humoral immune defects with granulomas MIM# 233650;Omenn syndrome MIM# 603554;Severe combined immunodeficiency, B cell-negative MIM# 601457 |
| RAG2     | BIALLELIC                              | Omenn syndrome MIM# 603554;Severe combined immunodeficiency, B cell-negative MIM# 601457;Combined cellular and humoral immune defects with granulomas MIM# 233650                                                                                                                                 |
| RAPSN    | BIALLELIC                              | Myasthenic syndrome, congenital, 11, associated with acetylcholine receptor deficiency (MIM#616326)                                                                                                                                                                                               |
| RASGRP1  | BIALLELIC                              | Immunodeficiency 64 (MIM#618534)                                                                                                                                                                                                                                                                  |
| RB1      | MONOALLELIC                            | Retinoblastoma, MIM# 180200                                                                                                                                                                                                                                                                       |
| RDX      | BIALLELIC                              | Deafness, autosomal recessive 24, MIM# 611022                                                                                                                                                                                                                                                     |
| REST     | MONOALLELIC                            | {Wilms tumor 6, susceptibility to}, MIM# 616806                                                                                                                                                                                                                                                   |
| RET      | MONOALLELIC                            | Multiple endocrine neoplasia IIB;Multiple endocrine neoplasia IIA                                                                                                                                                                                                                                 |
| RFX5     | BIALLELIC                              | Bare lymphocyte syndrome, type II, complementation group C MIM# 209920;Bare lymphocyte syndrome, type II, complementation group E MIM# 209920                                                                                                                                                     |
| RFXANK   | BIALLELIC                              | MHC class II deficiency, complementation group B, MIM#209920                                                                                                                                                                                                                                      |
| RFXAP    | BIALLELIC                              | Bare lymphocyte syndrome, type II, complementation group D MIM# 209920                                                                                                                                                                                                                            |
| RMRP     | BIALLELIC                              | Cartilage-hair hypoplasia MIM#250250                                                                                                                                                                                                                                                              |
| RNPC3    | BIALLELIC                              | Pituitary hormone deficiency, combined or isolated, 7, MIM# 618160                                                                                                                                                                                                                                |
| RPE65    | BIALLELIC                              | Leber congenital amaurosis 2 MIM#204100;Retinitis pigmentosa 20 MIM#613794                                                                                                                                                                                                                        |
| RPL11    | MONOALLELIC                            | Diamond-Blackfan anaemia, MIM#612562                                                                                                                                                                                                                                                              |
| RPL15    | MONOALLELIC                            | Diamond-Blackfan anaemia 12 , MIM#615550                                                                                                                                                                                                                                                          |
| RPL35A   | MONOALLELIC                            | Diamond-Blackfan anaemia 5, MIM#612528                                                                                                                                                                                                                                                            |
| RPL5     | MONOALLELIC                            | Diamond-Blackfan anaemia, MIM#612561                                                                                                                                                                                                                                                              |
| RPS10    | MONOALLELIC                            | Diamond-Blackfan anaemia 9, MIM#613308                                                                                                                                                                                                                                                            |
| RPS17    | MONOALLELIC                            | Diamond-Blackfan anaemia, MIM#612527                                                                                                                                                                                                                                                              |
| RPS19    | MONOALLELIC                            | Diamond-Blackfan anaemia, MIM#105650                                                                                                                                                                                                                                                              |
| RPS24    | MONOALLELIC                            | Diamond-Blackfan anaemia, MIM#610629                                                                                                                                                                                                                                                              |
| RPS26    | MONOALLELIC                            | Diamond-Blackfan anaemia, MM#613309                                                                                                                                                                                                                                                               |
| RPS7     | MONOALLELIC                            | Diamond-Blackfan anaemia 8, MIM#612563                                                                                                                                                                                                                                                            |
| RUNX1    | MONOALLELIC                            | Platelet disorder, familial, with associated myeloid malignancy, MIM# 601399                                                                                                                                                                                                                      |
| RYR1     | MONOALLELIC                            | {Malignant hyperthermia susceptibility 1} MIM#145600                                                                                                                                                                                                                                              |
| RYR2     | MONOALLELIC                            | Arrhythmogenic right ventricular dysplasia 2;Ventricular tachycardia, catecholaminergic polymorphic                                                                                                                                                                                               |
| S1PR2    | BIALLELIC                              | Deafness, autosomal recessive 68, MIM# 610419                                                                                                                                                                                                                                                     |
| SAMD9    | MONOALLELIC                            | MIRAGE syndrome, MIM#617053                                                                                                                                                                                                                                                                       |
| SAMD9L   | MONOALLELIC                            | Ataxia-pancytopenia syndrome, MIM# 159550                                                                                                                                                                                                                                                         |
| SAR1B    | BIALLELIC                              | Chylomicron retention disease, MIM# 246700                                                                                                                                                                                                                                                        |
| SBDS     | BIALLELIC                              | Shwachman-Diamond syndrome, MIM# 260400                                                                                                                                                                                                                                                           |
| SCNN1A   | BIALLELIC                              | Pseudohypoaldosteronism, type I, MIM# 264350                                                                                                                                                                                                                                                      |
| SCNN1B   | BIALLELIC                              | Pseudohypoaldosteronism, type I MIM# 264350                                                                                                                                                                                                                                                       |
| SCNN1G   | BIALLELIC                              | Pseudohypoaldosteronism, type I, MIM#264350                                                                                                                                                                                                                                                       |
| SERPINF1 | BIALLELIC                              | Osteogenesis imperfecta, type VI, MIM# 613982                                                                                                                                                                                                                                                     |
| SERPINH1 | BIALLELIC                              | Osteogenesis imperfecta, type X, MIM#613848                                                                                                                                                                                                                                                       |
| SGPL1    | BIALLELIC                              | Nephrotic syndrome, type 14 MIM#617575                                                                                                                                                                                                                                                            |
| SH2D1A   | X-LINKED: hemizygous mutation in males | Lymphoproliferative syndrome, X-linked, 1, MIM# 308240                                                                                                                                                                                                                                            |
| SI       | BIALLELIC                              | Sucrase-isomaltase deficiency, congenital, MIM#222900                                                                                                                                                                                                                                             |
| SLC12A1  | BIALLELIC                              | Bartter syndrome, type 1, MIM# 601678                                                                                                                                                                                                                                                             |
| SLC18A2  | BIALLELIC                              | Parkinsonism-dystonia, infantile, 2, MIM# 618049                                                                                                                                                                                                                                                  |
| SLC18A3  | BIALLELIC                              | Myasthenic syndrome, congenital, 21, presynaptic, MIM#617239                                                                                                                                                                                                                                      |
| SLC19A2  | BIALLELIC                              | Thiamine-responsive megaloblastic anemia syndrome, MIM# 249270                                                                                                                                                                                                                                    |
| SLC19A3  | BIALLELIC                              | Thiamine metabolism dysfunction syndrome 2 (biotin- or thiamine-responsive encephalopathy type 2), MIM# 607483                                                                                                                                                                                    |

|          |                                        |                                                                                                                                                                                         |
|----------|----------------------------------------|-----------------------------------------------------------------------------------------------------------------------------------------------------------------------------------------|
| SLC22A5  | BIALLELIC                              | Carnitine deficiency, systemic primary, MIM# 212140, MONDO:0008919                                                                                                                      |
| SLC25A13 | BIALLELIC                              | Citrullinemia, type II, neonatal-onset, MIM# 605814                                                                                                                                     |
| SLC25A15 | BIALLELIC                              | Hyperornithinemia-hyperammonemia-homocitrullinemia syndrome, MIM#238970                                                                                                                 |
| SLC25A19 | BIALLELIC                              | Thiamine metabolism dysfunction syndrome 4 (progressive polyneuropathy type), MIM#613710                                                                                                |
| SLC25A20 | BIALLELIC                              | Carnitine-acylcarnitine translocase deficiency, MIM#212138                                                                                                                              |
| SLC25A38 | BIALLELIC                              | Anemia, sideroblastic, 2, pyridoxine-refractory, MIM# 205950                                                                                                                            |
| SLC26A3  | BIALLELIC                              | Diarrhoea 1, secretory chloride, congenital, MIM# 214700                                                                                                                                |
| SLC26A4  | BIALLELIC                              | Deafness, autosomal recessive 4, with enlarged vestibular aqueduct 600791;Pendred syndrome 274600                                                                                       |
| SLC26A7  | BIALLELIC                              | Congenital hypothyroidism, MONDO:0018612, SLC26A7-related                                                                                                                               |
| SLC2A1   | BOTH monoallelic and biallelic         | GLUT1 deficiency syndrome 2, childhood onset, 612126;{Epilepsy, idiopathic generalized, susceptibility to, 12}, MIM#614847;GLUT1 deficiency syndrome 1, infantile onset, severe, 606777 |
| SLC30A10 | BIALLELIC                              | Hypermanganesemia with dystonia 1, MIM# 613280                                                                                                                                          |
| SLC34A3  | BIALLELIC                              | Hypophosphatemic rickets with hypercalciuria, MIM#241530                                                                                                                                |
| SLC35A2  | X-LINKED: hemizygous mutation in males | Congenital disorder of glycosylation, type II <sub>m</sub> , MIM #300896                                                                                                                |
| SLC37A4  | BOTH monoallelic and biallelic         | Glycogen storage disease Ib, MIM# 232220;Glycogen storage disease Ic, MIM# 232240;Congenital disorder of glycosylation, type II <sub>w</sub> , MIM# 619525                              |
| SLC39A4  | BIALLELIC                              | Acrodermatitis enteropathica, MIM# 201100                                                                                                                                               |
| SLC39A7  | BIALLELIC                              | Agammaglobulinaemia 9, autosomal recessive, MIM# 619693                                                                                                                                 |
| SLC39A8  | BIALLELIC                              | Congenital disorder of glycosylation, type II <sub>n</sub> , MIM#16721                                                                                                                  |
| SLC46A1  | BIALLELIC                              | Folate malabsorption, hereditary, MIM# 229050                                                                                                                                           |
| SLC4A1   | BIALLELIC                              | Distal renal tubular acidosis 4 with haemolytic anaemia MIM# 611590                                                                                                                     |
| SLC52A2  | BIALLELIC                              | Brown-Vialetto-Van Laere syndrome 2, MIM# 614707                                                                                                                                        |
| SLC52A3  | BIALLELIC                              | Brown-Vialetto-Van Laere syndrome 1, MIM# 211530                                                                                                                                        |
| SLC5A1   | BIALLELIC                              | Glucose/galactose malabsorption, MIM# 606824                                                                                                                                            |
| SLC5A5   | BIALLELIC                              | Thyroid dysmorphogenesis 1, MIM# 274400                                                                                                                                                 |
| SLC5A6   | BIALLELIC                              | Neurodegeneration, infantile-onset, biotin-responsive, MIM# 618973                                                                                                                      |
| SLC5A7   | BIALLELIC                              | Myasthenic syndrome, congenital, 20, presynaptic, MIM# 617143                                                                                                                           |
| SLC7A7   | BIALLELIC                              | Lysinuric protein intolerance, MIM# 222700                                                                                                                                              |
| SLITRK6  | BIALLELIC                              | Deafness and myopia MIM#221200                                                                                                                                                          |
| SLX4     | BIALLELIC                              | Fanconi anaemia, complementation group P, MIM# 613951                                                                                                                                   |
| SMAD2    | MONOALLELIC                            | Loeys-Dietz syndrome 6, MIM# 619656                                                                                                                                                     |
| SMAD3    | MONOALLELIC                            | Loeys-Dietz syndrome 3, MIM# 613795                                                                                                                                                     |
| SMARCD2  | BIALLELIC                              | Specific granule deficiency 2 MIM#617475                                                                                                                                                |
| SMN1     | BIALLELIC                              | Spinal muscular atrophy type 1, MIM#253300                                                                                                                                              |
| SMPD1    | BIALLELIC                              | Niemann-Pick disease, type A, MIM# 257200;Niemann-Pick disease, type B, MIM# 607616                                                                                                     |
| SNX10    | BIALLELIC                              | Osteopetrosis, autosomal recessive 8 MIM#615085                                                                                                                                         |
| SP110    | BIALLELIC                              | Hepatic veno-occlusive disease with immunodeficiency MIM#235550                                                                                                                         |
| SPR      | BIALLELIC                              | Dystonia, dopa-responsive, due to sepiapterin reductase deficiency, MIM# 612716                                                                                                         |
| SRP54    | MONOALLELIC                            | Neutropenia, severe congenital, 8, autosomal dominant, MIM# 618752                                                                                                                      |
| STAR     | BIALLELIC                              | Congenital lipoid adrenal hyperplasia, MIM#201710                                                                                                                                       |
| STAT1    | BIALLELIC                              | Immunodeficiency 31B, mycobacterial and viral infections, autosomal recessive MIM#613796                                                                                                |
| STAT3    | MONOALLELIC                            | Autoimmune disease, multisystem, infantile-onset, 1 MIM# 615952                                                                                                                         |
| STIM1    | BIALLELIC                              | Immunodeficiency 10 MIM#612783                                                                                                                                                          |
| STK4     | BIALLELIC                              | T-cell immunodeficiency, recurrent infections, autoimmunity, and cardiac malformations MIM#614868                                                                                       |
| STX11    | BIALLELIC                              | Haemophagocytic lymphohistiocytosis, familial, 4, MIM#603552                                                                                                                            |
| STX16    | MONOALLELIC, imprinted                 | Pseudohypoparathyroidism, type IB MIM#603233                                                                                                                                            |
| STXBP2   | BIALLELIC                              | Hemophagocytic lymphohistiocytosis, familial, 5, MIM# 613101                                                                                                                            |
| SYT2     | BIALLELIC                              | Myasthenic syndrome, congenital, 7B, presynaptic, autosomal recessive MIM#619461                                                                                                        |
| TANGO2   | BIALLELIC                              | Metabolic encephalomyopathic crises, recurrent, with rhabdomyolysis, cardiac arrhythmias, and neurodegeneration, MIM# 616878                                                            |
| TAT      | BIALLELIC                              | Tyrosinemia, type II, MIM#276600                                                                                                                                                        |
| TBL1X    | X-LINKED: hemizygous mutation in males | Hypothyroidism, congenital, nongoitrous, 8 MIM#301033                                                                                                                                   |

|           |                                        |                                                                                                                                      |
|-----------|----------------------------------------|--------------------------------------------------------------------------------------------------------------------------------------|
| TBX19     | BIALLELIC                              | Adrenocorticotrophic hormone deficiency, MIM#201400                                                                                  |
| TCF3      | BOTH monoallelic and biallelic         | Agammaglobulinaemia 8, autosomal dominant, MIM# 616941;Agammaglobulinaemia 8B, autosomal recessive, MIM# 619824                      |
| TCIRG1    | BIALLELIC                              | Osteopetrosis, autosomal recessive 1, MIM# 259700                                                                                    |
| TCN2      | BIALLELIC                              | Transcobalamin II deficiency MIM# 275350                                                                                             |
| TECTA     | BOTH monoallelic and biallelic         | Deafness, autosomal recessive 21 603629;Deafness, autosomal dominant 8/12 601543                                                     |
| TF        | BIALLELIC                              | Atransferrinemia MIM#209300                                                                                                          |
| TG        | BIALLELIC                              | Thyroid dysmorphogenesis 3, MIM# 274700                                                                                              |
| TGFB2     | MONOALLELIC                            | Loeys-Dietz syndrome 4, MIM#614816                                                                                                   |
| TGFB3     | MONOALLELIC                            | Loeys-Dietz syndrome 5 , MIM#615582                                                                                                  |
| TGFBR1    | MONOALLELIC                            | Loeys-Dietz syndrome 1, MIM# 609192                                                                                                  |
| TGFBR2    | MONOALLELIC                            | Loeys-Dietz syndrome 2, MIM# 610168                                                                                                  |
| TH        | BIALLELIC                              | Tyrosine hydroxylase deficiency, MIM#605407                                                                                          |
| THRA      | MONOALLELIC                            | Hypothyroidism, congenital, nongoitrous, 6, MIM# 614450                                                                              |
| TK2       | BIALLELIC                              | Mitochondrial DNA depletion syndrome 2 (myopathic type), 609560                                                                      |
| TMC1      | BIALLELIC                              | Deafness, autosomal recessive 7 MIM#600974                                                                                           |
| TMEM38B   | BIALLELIC                              | Osteogenesis imperfecta, type XIV , MIM#615066                                                                                       |
| TMIE      | BIALLELIC                              | Deafness, autosomal recessive 6 MIM#600971                                                                                           |
| TMPRSS3   | BIALLELIC                              | deafness, autosomal recessive MIM#601072                                                                                             |
| TNFRSF11A | BIALLELIC                              | Osteopetrosis, autosomal recessive 7 - MIM# 612301                                                                                   |
| TP53      | MONOALLELIC                            | Li-Fraumeni syndrome MIM#151623                                                                                                      |
| TPK1      | BIALLELIC                              | Thiamine metabolism dysfunction syndrome 5 (episodic encephalopathy type) MIM#614458                                                 |
| TPO       | BIALLELIC                              | Thyroid dysmorphogenesis 2A MIM#274500                                                                                               |
| PPP1      | BIALLELIC                              | Ceroid lipofuscinosis, neuronal, 2 MIM#204500 (Batten disease)                                                                       |
| TPRN      | BIALLELIC                              | Deafness, autosomal recessive 79, MIM# 613307                                                                                        |
| TRHR      | BIALLELIC                              | Hypothyroidism, congenital, nongoitrous, 7, MIM# 618573                                                                              |
| TRIM28    | MONOALLELIC                            | Wilms tumour, MONDO:0006058, TRIM28-related                                                                                          |
| TRIOBP    | BIALLELIC                              | Deafness, autosomal recessive 28, MIM#609823                                                                                         |
| TRMU      | BIALLELIC                              | Liver failure, transient infantile MIM# 613070                                                                                       |
| TRPM6     | BIALLELIC                              | Hypomagnesemia 1, intestinal MIM#602014                                                                                              |
| TSHB      | BIALLELIC                              | Hypothyroidism, congenital, nongoitrous 4, MIM#275100                                                                                |
| TSHR      | BOTH monoallelic and biallelic         | Hypothyroidism, congenital, nongoitrous, 1 - MIM#275200                                                                              |
| TPPA      | BIALLELIC                              | Ataxia with isolated vitamin E deficiency MIM#277460                                                                                 |
| TUBB1     | MONOALLELIC                            | Congenital hypothyroidism, MONDO:0018612, TUBB1-related;Macrothrombocytopenia, autosomal dominant, TUBB1-related, OMIM # 613112      |
| UBE2T     | BIALLELIC                              | Fanconi anaemia, complementation group T, MIM# 616435                                                                                |
| UGT1A1    | BIALLELIC                              | Crigler-Najjar syndrome, type I, MIM#218800                                                                                          |
| UMPS      | BIALLELIC                              | Orotic aciduriaMIM#258900                                                                                                            |
| UNC13D    | BIALLELIC                              | Haemophagocytic lymphohistiocytosis, familial, 3, MIM#608898                                                                         |
| UROS      | BIALLELIC                              | Porphyria, congenital erythropoietic MIM#263700                                                                                      |
| USH1C     | BIALLELIC                              | Usher syndrome type 1 MIM#276904                                                                                                     |
| USH1G     | BIALLELIC                              | Usher syndrome type 1 MIM#606943                                                                                                     |
| USH2A     | BIALLELIC                              | Usher Syndrome Type II MIM#276901                                                                                                    |
| VAMP1     | BIALLELIC                              | Myasthenic syndrome, congenital, 25, MIM# 618323                                                                                     |
| VDR       | BIALLELIC                              | Rickets, vitamin D-resistant, type IIA MIM#277440                                                                                    |
| VHL       | MONOALLELIC                            | von Hippel-Lindau syndrome MIM#193300                                                                                                |
| VKORC1    | BIALLELIC                              | Vitamin K-dependent clotting factors, combined deficiency of, 2 MIM#607473                                                           |
| VPS45     | BIALLELIC                              | Neutropenia, severe congenital, 5, autosomal recessive, MIM#615285                                                                   |
| WAS       | X-LINKED: hemizygous mutation in males | Neutropenia, severe congenital, X-linked , MIM#300299;Thrombocytopaenia, X-linked, MIM# 313900;Wiskott-Aldrich syndrome, MIM# 301000 |
| WDR1      | BIALLELIC                              | Periodic fever, immunodeficiency, and thrombocytopenia syndrome MIM#150550                                                           |
| WDR72     | BIALLELIC                              | Amelogenesis imperfecta, type IIA3, MIM# 613211;Distal RTA MONDO:0015827                                                             |
| WHRN      | BIALLELIC                              | Usher syndrome, type 2D, MIM# 611383;Deafness, autosomal recessive 31, MIM# 607084                                                   |
| WIPF1     | BIALLELIC                              | Wiskott-Aldrich syndrome 2 MIM#614493                                                                                                |
| WNK1      | MONOALLELIC                            | Pseudohypaldosteronism 2C (PHA2C), MIM#614492                                                                                        |

|       |                                        |                                                        |
|-------|----------------------------------------|--------------------------------------------------------|
| WNK4  | MONOALLELIC                            | Pseudohypaldosteronism, type IIB MIM#614491            |
| WT1   | MONOALLELIC                            | Wilms tumor, type 1, MIM#194070                        |
| XIAP  | X-LINKED: hemizygous mutation in males | Lymphoproliferative syndrome, X-linked, 2, MIM# 300635 |
| XPA   | BIALLELIC                              | Xeroderma pigmentosum, group A MIM#278700              |
| XPC   | BIALLELIC                              | Xeroderma pigmentosum, group C MIM#278720              |
| ZAP70 | BIALLELIC                              | Immunodeficiency MIM#176947                            |
